# Supplementary material for: Growth-rate regulated genes have profound impact on interpretation of transcriptome profiling in Saccharomyces cerevisiae
Source: Genome Biol. 2006 Nov 14;7(11):R107. doi: 10.1186/gb-2006-7-11-r107 (PMC1794586; doi:10.1186/gb-2006-7-11-r107)
Supplement: Additional data file 1 — The expression profiles (all specific growth rates) of the 6,091 annotated unique open reading frames (ORFs; including 'not physically mapped' and 'not in systematic sequence of S288C' ORFs) from the Saccharomyces Genome Database [56] (updated March 2004) can be viewed. Each gene can be selected by its name or, in case the gene has not been named, by its corresponding ORF name. [file gb-2006-7-11-r107-S1.xls]

## Sheet: Data viewer
		Growth-rate regulated genes have profound impact on transcriptome proﬁling in Saccharomyces cerevisiae											AAC1		DIP5	Showing gene: DIP5				87.173
		Birgitte Regenberg, Thomas Grotkjær, Ole Winther, Anders Fausbøll, Christoffer Bro, Mats Åkesson, Lars Kai Hansen, Søren Brunak & Jens Nielsen											AAC3		Table	752.546	304.018	77.2597	90.6902	82.1273	95.8739	87.173	121.6	139.877	81.38	77.8611	77.9611	3
		August 2006						http://www.cmb.dtu.dk/					AAD10			6.62346	5.71709	4.34717	4.50745	4.40827	4.56303	4.46789	4.80074	4.94076	4.39913	4.35493	4.35621
													AAD14		Geo. Mean	752.546	304.018	83.1764	100.54	139.877	79.0506
			Show gene:		DIP5		<---- select gene from drop-down list						AAD15			777.925	331.016	99.3887	149.222	236.199	171.215
													AAD16
											Gene included in analysis		AAD4		Sp. growth rate	0.02	0.05	0.1	0.2	0.25	0.33
													AAD6			1.03372	1.0888	1.19491	1.48421	1.68862	2.16589
													AAH1
													AAP1
													AAR2
													AAT1			Gene included in analysis
													AAT2
													ABC1
													ABD1
													ABF1
													ABF2
													ABM1
													ABP1
													ABP140
													ABZ1
													ACA1
													ACB1
													ACC1
													ACE2
													ACF2
													ACF4
													ACH1
													ACN9
					dChip				Scaled				ACO1
													ACP1
													ACS1
													ACS2
													ACT1
													ADA2
													ADE1
													ADE12
													ADE13
													ADE16
													ADE17
													ADE2
													ADE3
													ADE4
													ADE5,7
													ADE6
													ADE8
													ADH1
													ADH2
													ADH3
													ADH4
													ADH5
													ADH6
													ADH7
													ADK1
													ADK2
													ADO1
													ADP1
													ADR1
													ADY2
													ADY3
													ADY4
													AEP1
													AEP2
													AFG1
													AFG2
													AFG3
													AFR1
													AFT2
													AGA1
													AGA2
													AGC1
													AGE1
													AGE2
													AGP1
													AGP2
													AGP3
													AGX1
													AHA1
													AHC1
													AHP1
													AHT1
													AIP1
													AIR1
													AIR2
													AKL1
													AKR1
													AKR2
													ALA1
													ALD1
													ALD2
													ALD3
													ALD4
													ALD5
													ALD6
													ALF1
													ALG1
													ALG11
													ALG2
													ALG5
													ALG6
													ALG7
													ALG8
													ALG9
													ALK1
													ALO1
													ALP1
													ALR1
													ALR2
													AMA1
													AMD1
													AMD2
													AME1
													AMN1
													AMS1
													ANB1
													ANP1
													ANT1
													AOR1
													AOS1
													APA1
													APA2
													APC1
													APC11
													APC2
													APC4
													APC5
													APC9
													APD1
													APE2
													APE3
													API2
													APJ1
													APL1
													APL2
													APL3
													APL4
													APL5
													APL6
													APM1
													APM2
													APM3
													APM4
													APN1
													APN2
													APP1
													APP2
													APS1
													APS2
													APS3
													APT1
													APT2
													AQR1
													AQY1
													AQY2
													ARA1
													ARC1
													ARC15
													ARC18
													ARC19
													ARC35
													ARC40
													ARD1
													ARE1
													ARE2
													ARF1
													ARF2
													ARF3
													ARG1
													ARG2
													ARG3
													ARG4
													ARG5,6
													ARG8
													ARG80
													ARG81
													ARG82
													ARH1
													ARK1
													ARL1
													ARL3
													ARN1
													ARN2
													ARO1
													ARO10
													ARO2
													ARO3
													ARO4
													ARO7
													ARO8
													ARO80
													ARO9
													ARP1
													ARP10
													ARP2
													ARP3
													ARP4
													ARP5
													ARP6
													ARP7
													ARP8
													ARP9
													ARR1
													ARR2
													ARR3
													ARR4
													ARV1
													ARX1
													ASC1
													ASE1
													ASF1
													ASF2
													ASG7
													ASH1
													ASI1
													ASI2
													ASI3
													ASK1
													ASK10
													ASM4
													ASN1
													ASN2
													ASP1
													ASP3-1
													AST1
													AST2
													ATC1
													ATE1
													ATF1
													ATF2
													ATG1
													ATG10
													ATG11
													ATG12
													ATG13
													ATG14
													ATG15
													ATG16
													ATG17
													ATG18
													ATG19
													ATG2
													ATG20
													ATG21
													ATG22
													ATG23
													ATG26
													ATG27
													ATG3
													ATG4
													ATG5
													ATG7
													ATG8
													ATG9
													ATH1
													ATM1
													ATO3
													ATP1
													ATP10
													ATP11
													ATP12
													ATP14
													ATP15
													ATP16
													ATP17
													ATP18
													ATP2
													ATP20
													ATP3
													ATP4
													ATP5
													ATP6
													ATP7
													ATR1
													ATS1
													ATX1
													ATX2
													AUR1
													AUS1
													AVO1
													AVO2
													AVT1
													AVT2
													AVT3
													AVT4
													AVT5
													AVT6
													AVT7
													AXL1
													AXL2
													AYR1
													AYT1
													AZF1
													AZR1
													BAG7
													BAP2
													BAP3
													BAR1
													BAS1
													BAT1
													BAT2
													BBC1
													BBP1
													BCD1
													BCK1
													BCK2
													BCP1
													BCS1
													BCY1
													BDF1
													BDF2
													BDH1
													BDP1
													BEM1
													BEM2
													BEM3
													BEM4
													BET1
													BET2
													BET3
													BET4
													BET5
													BFA1
													BFR1
													BFR2
													BGL2
													BI3
													BI4
													BIG1
													BIK1
													BIM1
													BIO2
													BIO3
													BIO4
													BIO5
													BIR1
													BIT61
													BLM3
													BMH1
													BMH2
													BMS1
													BNA1
													BNA2
													BNA3
													BNA4
													BNA5
													BNA6
													BNI1
													BNI4
													BNI5
													BNR1
													BNS1
													BOI1
													BOI2
													BOS1
													BPH1
													BPL1
													BPT1
													BRE1
													BRE2
													BRE4
													BRE5
													BRF1
													BRN1
													BRO1
													BRR1
													BRR2
													BRR6
													BRX1
													BSC1
													BSC2
													BSC3
													BSC4
													BSC5
													BSC6
													BSD2
													BSP1
													BST1
													BTN2
													BTS1
													BTT1
													BUB1
													BUB2
													BUB3
													BUD13
													BUD14
													BUD16
													BUD17
													BUD19
													BUD2
													BUD20
													BUD21
													BUD22
													BUD23
													BUD25
													BUD26
													BUD27
													BUD28
													BUD3
													BUD30
													BUD31
													BUD32
													BUD4
													BUD5
													BUD6
													BUD7
													BUD8
													BUD9
													BUL1
													BUL2
													BUR2
													BUR6
													BYE1
													BZZ1
													CAC2
													CAD1
													CAF120
													CAF130
													CAF16
													CAF17
													CAF20
													CAF4
													CAF40
													CAJ1
													CAK1
													CAM1
													CAN1
													CAP1
													CAP2
													CAR1
													CAR2
													CAT2
													CAT5
													CAT8
													CAX4
													CBC2
													CBF1
													CBF2
													CBF5
													CBK1
													CBP1
													CBP2
													CBP3
													CBP4
													CBP6
													CBR1
													CBS1
													CBS2
													CBT1
													CCA1
													CCC1
													CCC2
													CCE1
													CCH1
													CCL1
													CCP1
													CCR4
													CCT2
													CCT3
													CCT4
													CCT5
													CCT6
													CCT7
													CCT8
													CCW12
													CCZ1
													CDA1
													CDA2
													CDC1
													CDC10
													CDC11
													CDC12
													CDC13
													CDC14
													CDC15
													CDC16
													CDC19
													CDC2
													CDC20
													CDC21
													CDC23
													CDC24
													CDC25
													CDC26
													CDC27
													CDC28
													CDC3
													CDC31
													CDC33
													CDC34
													CDC36
													CDC37
													CDC39
													CDC4
													CDC40
													CDC42
													CDC43
													CDC45
													CDC46
													CDC47
													CDC48
													CDC5
													CDC50
													CDC53
													CDC54
													CDC55
													CDC6
													CDC60
													CDC7
													CDC73
													CDC8
													CDC9
													CDC91
													CDD1
													CDH1
													CDS1
													CEF1
													CEG1
													CEM1
													CEP3
													CET1
													CFD1
													CFT1
													CFT2
													CGR1
													CHA1
													CHA4
													CHC1
													CHD1
													CHK1
													CHL1
													CHL4
													CHO1
													CHO2
													CHS1
													CHS2
													CHS3
													CHS5
													CHS6
													CHS7
													CIC1
													CIK1
													CIN1
													CIN2
													CIN4
													CIN5
													CIN8
													CIS1
													CIS3
													CIT1
													CIT2
													CIT3
													CKA1
													CKA2
													CKB1
													CKB2
													CKI1
													CKS1
													CLA4
													CLB1
													CLB2
													CLB3
													CLB4
													CLB5
													CLB6
													CLC1
													CLF1
													CLG1
													CLN1
													CLN2
													CLN3
													CLP1
													CLU1
													CMD1
													CMK1
													CMK2
													CMP2
													CNA1
													CNB1
													CNE1
													CNM67
													CNS1
													COF1
													COG1
													COG2
													COG3
													COG4
													COG5
													COG6
													COG7
													COG8
													COP1
													COQ1
													COQ2
													COQ3
													COQ4
													COQ5
													COQ6
													COR1
													COS1
													COS10
													COS111
													COS12
													COS2
													COS3
													COS4
													COS5
													COS6
													COS7
													COS8
													COS9
													COT1
													COX10
													COX11
													COX12
													COX13
													COX14
													COX15
													COX16
													COX17
													COX18
													COX19
													COX20
													COX4
													COX5A
													COX5B
													COX6
													COX7
													COX8
													COX9
													COY1
													CPA1
													CPA2
													CPD1
													CPR1
													CPR2
													CPR3
													CPR4
													CPR5
													CPR6
													CPR7
													CPR8
													CPS1
													CPT1
													CRC1
													CRD1
													CRH1
													CRM1
													CRN1
													CRP1
													CRR1
													CRS5
													CRZ1
													CSE1
													CSE2
													CSE4
													CSF1
													CSG2
													CSH1
													CSI1
													CSL4
													CSM1
													CSM2
													CSM3
													CSM4
													CSN12
													CSN9
													CSR1
													CSR2
													CST6
													CST9
													CTA1
													CTF13
													CTF18
													CTF19
													CTF3
													CTF4
													CTF8
													CTH1
													CTI6
													CTK1
													CTK2
													CTK3
													CTL1
													CTM1
													CTP1
													CTR1
													CTR2
													CTR3
													CTR86
													CTR9
													CTS1
													CTS2
													CTT1
													CUE1
													CUE2
													CUE3
													CUE4
													CUE5
													CUL3
													CUP1-1
													CUP2
													CUP5
													CUP9
													CUS1
													CUS2
													CWC15
													CWC2
													CWC21
													CWC22
													CWC23
													CWC24
													CWC25
													CWC27
													CWH41
													CWH43
													CWP1
													CYB2
													CYB5
													CYC1
													CYC2
													CYC3
													CYC7
													CYC8
													CYK3
													CYM1
													CYR1
													CYS3
													CYS4
													CYT1
													CYT2
													DAD1
													DAD2
													DAK1
													DAK2
													DAL1
													DAL2
													DAL3
													DAL4
													DAL5
													DAL7
													DAL80
													DAL81
													DAL82
													DAM1
													DAN1
													DAN2
													DAN3
													DAN4
													DAP1
													DAP2
													DAT1
													DBF2
													DBF20
													DBF4
													DBP1
													DBP10
													DBP2
													DBP3
													DBP5
													DBP6
													DBP7
													DBP8
													DBP9
													DBR1
													DCC1
													DCD1
													DCG1
													DCI1
													DCP1
													DCP2
													DCS1
													DCS2
													DCW1
													DDC1
													DDI1
													DDP1
													DDR48
													DED1
													DED81
													DEF1
													DEG1
													DEM1
													DEP1
													DER1
													DFG10
													DFG16
													DFG5
													DFR1
													DGA1
													DHH1
													DHR2
													DIA1
													DIA2
													DIA3
													DIA4
													DIB1
													DIC1
													DID2
													DID4
													DIE2
													DIG1
													DIG2
													DIM1
													DIN7
													DIP2
													DIP5
													DIS3
													DIT1
													DIT2
													DJP1
													DLD1
													DLD2
													DLD3
													DLS1
													DMC1
													DML1
													DNA2
													DNF1
													DNF2
													DNF3
													DNL4
													DNM1
													DOA1
													DOA4
													DOC1
													DOG1
													DOG2
													DOM34
													DON1
													DOP1
													DOS2
													DOT1
													DOT5
													DOT6
													DPB11
													DPB2
													DPB3
													DPB4
													DPH2
													DPH5
													DPL1
													DPM1
													DPP1
													DPS1
													DRE2
													DRS1
													DRS2
													DSE1
													DSE2
													DSE3
													DSE4
													DSK2
													DSL1
													DSN1
													DSS4
													DST1
													DTD1
													DTR1
													DUN1
													DUO1
													DUR1,2
													DUR3
													DUS1
													DUT1
													DYN1
													DYN2
													DYS1
													EAF3
													EAF5
													EAF6
													EAP1
													EBP2
													EBS1
													ECI1
													ECM1
													ECM10
													ECM11
													ECM12
													ECM13
													ECM14
													ECM15
													ECM16
													ECM17
													ECM18
													ECM19
													ECM2
													ECM21
													ECM22
													ECM23
													ECM25
													ECM27
													ECM29
													ECM3
													ECM30
													ECM31
													ECM32
													ECM33
													ECM34
													ECM37
													ECM38
													ECM39
													ECM4
													ECM40
													ECM5
													ECM7
													ECM8
													ECM9
													ECO1
													EDC1
													EDC2
													EDE1
													EFB1
													EFR3
													EFT1
													EGD1
													EGD2
													EGT2
													EHD3
													EHT1
													EKI1
													ELA1
													ELC1
													ELG1
													ELM1
													ELO1
													ELP2
													ELP3
													ELP4
													ELP6
													EMG1
													EMI1
													EMI2
													EMI5
													EMP24
													EMP46
													EMP47
													EMP70
													ENA2
													ENA5
													ENB1
													END3
													ENO1
													ENO2
													ENP1
													ENT1
													ENT2
													ENT3
													ENT4
													ENT5
													EPL1
													EPS1
													EPT1
													ERB1
													ERD1
													ERD2
													ERF2
													ERG1
													ERG10
													ERG11
													ERG12
													ERG13
													ERG2
													ERG20
													ERG24
													ERG25
													ERG26
													ERG27
													ERG28
													ERG3
													ERG4
													ERG5
													ERG6
													ERG7
													ERG8
													ERG9
													ERO1
													ERP1
													ERP2
													ERP3
													ERP4
													ERP5
													ERP6
													ERS1
													ERV1
													ERV14
													ERV15
													ERV2
													ERV25
													ERV29
													ERV41
													ERV46
													ESA1
													ESBP6
													ESC1
													ESC2
													ESC8
													ESP1
													ESS1
													EST1
													EST2
													EST3
													ETR1
													EUG1
													EXG1
													EXG2
													EXO1
													EXO70
													EXO84
													FAA1
													FAA2
													FAA3
													FAA4
													FAB1
													FAD1
													FAL1
													FAP1
													FAP7
													FAR1
													FAR10
													FAR11
													FAR3
													FAR7
													FAR8
													FAS1
													FAS2
													FAT1
													FAU1
													FBA1
													FBP1
													FBP26
													FCP1
													FCY1
													FCY2
													FCY21
													FCY22
													FDH1
													FDH2
													FEN1
													FEN2
													FES1
													FET3
													FET4
													FET5
													FHL1
													FIG1
													FIG2
													FIG4
													FIN1
													FIP1
													FIR1
													FIS1
													FIT1
													FIT2
													FIT3
													FKH1
													FKH2
													FKS1
													FKS3
													FLO1
													FLO10
													FLO8
													FLO9
													FLR1
													FLX1
													FMC1
													FMN1
													FMO
													FMS1
													FMT1
													FOB1
													FOL1
													FOL2
													FOL3
													FOX2
													FPR1
													FPR2
													FPR3
													FPR4
													FPS1
													FRE1
													FRE2
													FRE3
													FRE4
													FRE5
													FRE6
													FRE7
													FRM2
													FRQ1
													FRS1
													FRS2
													FSH1
													FSH2
													FSH3
													FSP2
													FTH1
													FTR1
													FUI1
													FUM1
													FUN11
													FUN12
													FUN14
													FUN19
													FUN21
													FUN26
													FUN30
													FUN34
													FUR1
													FUR4
													FUS1
													FUS2
													FUS3
													FYV1
													FYV10
													FYV12
													FYV4
													FYV5
													FYV6
													FYV7
													FYV8
													FZF1
													FZO1
													GAA1
													GAC1
													GAD1
													GAL1
													GAL10
													GAL11
													GAL2
													GAL3
													GAL4
													GAL7
													GAL80
													GAL83
													GAP1
													GAR1
													GAS1
													GAS3
													GAS4
													GAS5
													GAT1
													GAT2
													GAT3
													GAT4
													GBP2
													GCD1
													GCD10
													GCD11
													GCD14
													GCD2
													GCD6
													GCD7
													GCN1
													GCN2
													GCN20
													GCN3
													GCN4
													GCN5
													GCR1
													GCR2
													GCS1
													GCV1
													GCV2
													GCV3
													GCY1
													GDA1
													GDB1
													GDH1
													GDH2
													GDH3
													GDI1
													GDS1
													GEA1
													GEA2
													GEF1
													GFA1
													GFD1
													GGA1
													GGA2
													GIC1
													GIC2
													GID7
													GID8
													GIM3
													GIM4
													GIM5
													GIN4
													GIP1
													GIP2
													GIR2
													GIS1
													GIS2
													GIS3
													GIS4
													GIT1
													GLC3
													GLC7
													GLC8
													GLE1
													GLE2
													GLG1
													GLG2
													GLK1
													GLN1
													GLN3
													GLN4
													GLO1
													GLO2
													GLO3
													GLO4
													GLR1
													GLT1
													GLY1
													GMH1
													GNA1
													GND1
													GND2
													GNP1
													GNT1
													GOD1
													GON7
													GOS1
													GOT1
													GPA1
													GPA2
													GPB1
													GPB2
													GPD1
													GPD2
													GPG1
													GPH1
													GPI1
													GPI10
													GPI11
													GPI12
													GPI13
													GPI15
													GPI16
													GPI17
													GPI2
													GPI8
													GPM1
													GPM2
													GPM3
													GPR1
													GPT2
													GPX1
													GPX2
													GRC3
													GRD19
													GRE1
													GRE2
													GRE3
													GRR1
													GRS1
													GRS2
													GRX1
													GRX3
													GRX4
													GRX5
													GSC2
													GSF2
													GSG1
													GSH1
													GSH2
													GSP1
													GSP2
													GSY1
													GSY2
													GTR1
													GTR2
													GTS1
													GTT1
													GTT2
													GTT3
													GUA1
													GUF1
													GUK1
													GUP1
													GUP2
													GUT1
													GUT2
													GWT1
													GYP1
													GYP5
													GYP6
													GYP7
													GYP8
													GZF3
													HAA1
													HAC1
													HAL1
													HAL5
													HAL9
													HAM1
													HAP1
													HAP2
													HAP3
													HAP4
													HAP5
													HAS1
													HAT1
													HAT2
													HBS1
													HBT1
													HCA4
													HCH1
													HCM1
													HCR1
													HCS1
													HDA1
													HDA2
													HDA3
													HEF3
													HEK2
													HEM1
													HEM12
													HEM13
													HEM14
													HEM15
													HEM2
													HEM3
													HEM4
													HES1
													HEX3
													HFA1
													HFI1
													HFM1
													HGH1
													HHF2
													HHO1
													HHT1
													HHT2
													HIP1
													HIR1
													HIR2
													HIR3
													HIS1
													HIS2
													HIS3
													HIS4
													HIS5
													HIS6
													HIS7
													HIT1
													HKR1
													HLJ1
													HLR1
													HMF1
													HMG1
													HMG2
													HMI1
													HMLALPHA1
													HMLALPHA2
													HMO1
													HMRA1
													HMRA2
													HMS1
													HMS2
													HMT1
													HMX1
													HNM1
													HNT1
													HNT2
													HNT3
													HO
													HOC1
													HOF1
													HOG1
													HOL1
													HOM2
													HOM3
													HOM6
													HOP1
													HOP2
													HOR2
													HOR7
													HOS1
													HOS2
													HOS3
													HOS4
													HOT1
													HPA2
													HPA3
													HPC2
													HPR1
													HPR5
													HPT1
													HRB1
													HRD1
													HRD3
													HRK1
													HRP1
													HRR25
													HRT1
													HRT3
													HSC82
													HSD1
													HSE1
													HSF1
													HSH155
													HSH49
													HSL1
													HSL7
													HSM3
													HSP10
													HSP104
													HSP12
													HSP150
													HSP26
													HSP30
													HSP31
													HSP42
													HSP60
													HSP78
													HSP82
													HST1
													HST2
													HST3
													HST4
													HTA1
													HTA2
													HTB1
													HTB2
													HTL1
													HTS1
													HTZ1
													HUA1
													HUA2
													HUB1
													HUG1
													HUL4
													HUL5
													HUR1
													HUT1
													HVG1
													HXK1
													HXK2
													HXT1
													HXT10
													HXT12
													HXT14
													HXT16
													HXT2
													HXT3
													HXT4
													HXT5
													HXT6
													HXT7
													HXT8
													HXT9
													HYM1
													HYP2
													HYR1
													HYS2
													IAH1
													IBD2
													ICL1
													ICL2
													ICS2
													ICS3
													ICT1
													ICY1
													IDH1
													IDH2
													IDI1
													IDP1
													IDP2
													IDP3
													IDS2
													IES1
													IES2
													IES3
													IES4
													IES5
													IES6
													IFH1
													IFM1
													IKI1
													IKI3
													ILM1
													ILS1
													ILV1
													ILV2
													ILV3
													ILV5
													ILV6
													IMD1
													IMD2
													IMD3
													IMD4
													IME1
													IME2
													IME4
													IMG1
													IMG2
													IMH1
													IML1
													IML2
													IML3
													IMP1
													IMP2
													IMP2'
													IMP3
													IMP4
													INH1
													INM1
													INO1
													INO2
													INO4
													INO80
													INP51
													INP52
													INP53
													INP54
													IOC2
													IOC3
													IOC4
													IPI3
													IPK1
													IPL1
													IPP1
													IPT1
													IQG1
													IRA1
													IRA2
													IRE1
													IRR1
													IRS4
													ISA1
													ISA2
													ISC1
													ISC10
													ISF1
													ISM1
													ISN1
													ISR1
													IST1
													IST2
													IST3
													ISU1
													ISU2
													ISW1
													ISW2
													ISY1
													ITC1
													ITR1
													ITR2
													ITT1
													IVY1
													IWR1
													IWS1
													IXR1
													JAC1
													JEM1
													JEN1
													JID1
													JNM1
													JSN1
													KAE1
													KAP104
													KAP114
													KAP120
													KAP122
													KAP123
													KAP95
													KAR1
													KAR2
													KAR3
													KAR4
													KAR5
													KAR9
													KCC4
													KCS1
													KEL1
													KEL2
													KEL3
													KEM1
													KES1
													KEX1
													KEX2
													KGD1
													KGD2
													KHA1
													KIC1
													KIN1
													KIN2
													KIN28
													KIN3
													KIN4
													KIN82
													KIP1
													KIP2
													KIP3
													KKQ8
													KNH1
													KNS1
													KOG1
													KRE1
													KRE11
													KRE2
													KRE27
													KRE29
													KRE33
													KRE5
													KRE6
													KRE9
													KRI1
													KRR1
													KRS1
													KSP1
													KSS1
													KTI12
													KTR1
													KTR2
													KTR3
													KTR4
													KTR5
													KTR6
													KTR7
													LAC1
													LAG1
													LAG2
													LAP3
													LAP4
													LAS1
													LAS17
													LAS21
													LAT1
													LCB1
													LCB2
													LCB3
													LCB4
													LCB5
													LCD1
													LCP5
													LDB7
													LEA1
													LEE1
													LEM3
													LEO1
													LEU1
													LEU2
													LEU3
													LEU4
													LEU5
													LEU9
													LGE1
													LHP1
													LHS1
													LIA1
													LIF1
													LIN1
													LIP2
													LIP5
													LOC1
													LOS1
													LOT5
													LOT6
													LPD1
													LPE10
													LPP1
													LRE1
													LRG1
													LRO1
													LRP1
													LRS4
													LSB1
													LSB3
													LSB5
													LSB6
													LSC1
													LSC2
													LSG1
													LSM1
													LSM2
													LSM3
													LSM4
													LSM5
													LSM6
													LSM7
													LSM8
													LSP1
													LST4
													LST7
													LST8
													LTE1
													LTP1
													LTV1
													LUC7
													LYP1
													LYS1
													LYS12
													LYS14
													LYS2
													LYS20
													LYS21
													LYS4
													LYS5
													LYS7
													LYS9
													MAC1
													MAD1
													MAD2
													MAD3
													MAE1
													MAF1
													MAG1
													MAG2
													MAK10
													MAK11
													MAK16
													MAK21
													MAK3
													MAK31
													MAK32
													MAK5
													MAL11
													MAL13
													MAL23
													MAL31
													MAL32
													MAL33
													MAM1
													MAM3
													MAM33
													MAP1
													MAP2
													MAS1
													MAS2
													MAS6
													MBA1
													MBB1
													MBF1
													MBP1
													MBR1
													MCA1
													MCD1
													MCD4
													MCH1
													MCH2
													MCH4
													MCH5
													MCK1
													MCM1
													MCM10
													MCM16
													MCM2
													MCM21
													MCM22
													MCM3
													MCM6
													MCR1
													MCT1
													MCX1
													MDG1
													MDH1
													MDH2
													MDH3
													MDJ1
													MDJ2
													MDL1
													MDL2
													MDM1
													MDM10
													MDM12
													MDM20
													MDM30
													MDM31
													MDM32
													MDM34
													MDM35
													MDM36
													MDM38
													MDM39
													MDN1
													MDR1
													MDS3
													MDV1
													MEC1
													MEC3
													MED1
													MED11
													MED2
													MED4
													MED6
													MED7
													MED8
													MEF1
													MEF2
													MEI4
													MEI5
													MEK1
													MEL1
													MEP1
													MEP2
													MEP3
													MER1
													MES1
													MET1
													MET10
													MET12
													MET13
													MET14
													MET16
													MET17
													MET18
													MET2
													MET22
													MET28
													MET3
													MET30
													MET31
													MET32
													MET4
													MET6
													MET7
													MET8
													MEU1
													MEX67
													MF(ALPHA)1
													MF(ALPHA)2
													MFA1
													MFA2
													MFT1
													MGA1
													MGA2
													MGE1
													MGM1
													MGM101
													MGS1
													MGT1
													MHP1
													MHR1
													MHT1
													MID1
													MID2
													MIF2
													MIG1
													MIG2
													MIG3
													MIH1
													MIP1
													MIP6
													MIR1
													MIS1
													MKC7
													MKK1
													MKK2
													MKS1
													MKT1
													MLC1
													MLF3
													MLH1
													MLH2
													MLH3
													MLP1
													MLP2
													MLS1
													MMF1
													MMM1
													MMP1
													MMR1
													MMS1
													MMS2
													MMS21
													MMS22
													MMS4
													MMT1
													MMT2
													MND1
													MND2
													MNE1
													MNL1
													MNN1
													MNN10
													MNN11
													MNN2
													MNN4
													MNN5
													MNN9
													MNR2
													MNS1
													MNT2
													MNT3
													MNT4
													MOB1
													MOD5
													MOG1
													MOH1
													MON1
													MON2
													MOT1
													MOT2
													MOT3
													MPA43
													MPC54
													MPD1
													MPD2
													MPE1
													MPH1
													MPH2
													MPH3
													MPM1
													MPP10
													MPS1
													MPS2
													MPS3
													MPT5
													MRC1
													MRD1
													MRE11
													MRF1
													MRH1
													MRH4
													MRK1
													MRL1
													MRM2
													MRP1
													MRP10
													MRP13
													MRP17
													MRP2
													MRP20
													MRP21
													MRP4
													MRP49
													MRP51
													MRP7
													MRP8
													MRPL1
													MRPL10
													MRPL11
													MRPL13
													MRPL15
													MRPL16
													MRPL17
													MRPL19
													MRPL20
													MRPL22
													MRPL23
													MRPL24
													MRPL25
													MRPL27
													MRPL28
													MRPL3
													MRPL31
													MRPL32
													MRPL33
													MRPL35
													MRPL36
													MRPL37
													MRPL38
													MRPL39
													MRPL4
													MRPL40
													MRPL44
													MRPL49
													MRPL50
													MRPL51
													MRPL6
													MRPL7
													MRPL8
													MRPL9
													MRPS16
													MRPS17
													MRPS18
													MRPS28
													MRPS35
													MRPS5
													MRPS8
													MRPS9
													MRS1
													MRS11
													MRS2
													MRS3
													MRS4
													MRS5
													MRS6
													MRT4
													MSB1
													MSB2
													MSB3
													MSB4
													MSC1
													MSC2
													MSC3
													MSC6
													MSC7
													MSD1
													MSE1
													MSF1
													MSG5
													MSH1
													MSH2
													MSH3
													MSH4
													MSH5
													MSH6
													MSI1
													MSK1
[truncated: 4,091 more rows]

## Sheet: dChip normalised data
ORF	D_0.02	D_0.05	D_0.10_1	D_0.10_2	D_0.10_3	D_0.20_1	D_0.20_2	D_0.20_3	D_0.25	D_0.33_1	D_0.33_2	D_0.33_3	A calls
AAC1	5355.33	4422.86	3426.88	4267.03	3663.9	2153.07	2394.11	2791.51	3280.38	1455.08	1308.43	1250.28	0
AAC3	44.2545	50.1508	71.4206	79.0629	58.3293	104.681	89.028	75.9233	99.9252	145.435	145.118	106.409	2
AAD10	663.153	568.069	412.881	354.288	321.212	175.55	196.736	239.282	166.39	121.748	132.64	142.568	0
AAD14	398.294	465.877	459.706	496.752	347.739	979.726	949.806	1001.63	1826.85	1207.45	962.105	927.345	0
AAD15	46.8684	45.853	12.3538	12.432	11.9128	29.5181	31.0055	27.0473	46.4234	11.484	13.8146	11.9247	8
AAD16	3033.13	2187.18	1044.95	1419.58	1190.92	1207.01	1380.63	1302.37	1343.86	884.448	978.711	923.045	0
AAD4	198.083	279.021	109.463	189.896	199.291	197.201	195.239	212.036	211.444	246.724	244.69	202.785	0
AAD6	25.348	16.6922	7.3822	8.3587	17.6747	11.1028	13.5364	8.1182	5.6578	9.8875	10.6926	3.2727	5
AAH1	321.758	183.276	352.521	336.281	278.505	641.745	743.91	720.795	606.744	513.273	864.536	680.545	0
AAP1	376.893	395.288	372.078	471.608	454.289	335.624	329.119	299.791	281.525	411.398	381.193	292.45	0
AAR2	42.9359	65.6357	46.7807	36.6515	34.1265	30.1132	29.0704	41.9172	30.9312	21.7971	32.8902	28.7223	10
AAT1	303.855	307.74	588.626	519.549	532.219	509.154	567.857	569.661	536.681	196.836	435.703	417.787	0
AAT2	1807.56	2883.23	4370.72	4958.5	4045.69	3813.15	4176.4	4841.65	2717.22	3646.5	3567.21	3349.77	0
ABC1	193.863	207.904	172.121	197.281	132.821	186.382	173.369	167.464	235.483	188.697	154.06	187.666	0
ABD1	331.671	374.623	272.462	341.582	354.176	383.725	387.057	329.22	365.815	377.489	407.601	231.031	0
ABF1	563.874	462.186	692.286	713.479	682.949	512.889	545.878	571.528	474.701	616.251	597.902	694.612	0
ABF2	2020.44	1730.32	3047.67	2345.3	2131.6	2119.42	2473.39	2196.45	2029.68	1557.54	1936.94	2130.93	0
ABM1	356.528	155.401	146.55	166.237	172.407	179.854	166.294	155.956	152.858	169.063	146.2	83.8585	1
ABP1	970.787	1223.51	378.324	759.873	909.273	1008.13	1181.9	1384.36	1000.22	1051.03	1282.07	1543.7	0
ABP140	37.0856	74.5104	86.7355	114.436	64.0765	129.842	122.577	145.588	153.146	98.8998	124.571	327.285	0
ABZ1	309.387	470.792	291.499	512.913	450.919	513.734	633.074	416.114	577.04	566.727	593.502	393.103	0
ACA1	300.001	239.957	215.268	177.362	148.694	91.9666	81.1873	117.883	105.676	136.739	97.9765	147.94	0
ACB1	4306.43	3736.09	3962.32	3561.5	3016.55	3695.23	3633.62	2742.96	4152.69	3005.67	3408.87	3811.14	0
ACC1	7737.61	7872.64	6577.12	6161.83	5692.96	3949.65	4187.55	4490.86	4082.22	4096.86	3717.86	3970.3	0
ACE2	255.094	184.347	274.475	379.564	351.86	290.443	279.375	321.469	305.069	438.677	464.91	781.52	0
ACF2	351.515	268.441	272.569	244.313	295.561	254.722	303.641	354.615	233.374	266.875	267.938	183.24	0
ACF4	243.14	142.201	188.375	207.86	178.729	184.701	229.852	244.784	210.31	168.62	197.247	188.858	0
ACH1	2762.62	3306.62	2694.94	3565.58	4185.6	3732.27	4022.75	3592.05	4735.41	4468.1	3202.96	2514.72	0
ACN9	906.351	1122.77	921.153	1032.05	994.718	1000.52	844.541	1143.66	1234.21	1724.41	1265.48	1841.85	0
ACO1	4124.32	3966.65	4580.97	4471.79	5535.67	4979.89	5230.37	5125.59	4854.57	4915.42	4571.31	3865.83	0
ACP1	3650.84	3162.79	3056.17	3909.88	4032.55	3305.81	3372.84	4409.38	4116.67	4872.1	4982.75	5478.64	0
ACS1	6217.84	7317.04	7231.55	7979.6	10837.4	5429.69	5893.08	6917.22	4979.68	658.759	480.452	446.208	0
ACS2	4491.31	4350.72	4823.15	4918.56	5230.99	4092.49	4755.32	4915.38	3176	4315.13	4642.78	4045.4	0
ACT1	10626	9864.72	9257.38	10411.8	9211.85	8713.99	8425.59	9232.08	8806.76	8168.42	7721.62	8657.64	0
ADA2	195.891	294.014	532.759	267.439	367.195	321.846	289.324	323.528	353.566	209.771	279.467	314.903	0
ADE1	1842.24	831.973	2262.78	2640.4	2627.53	3187.74	3719.06	3604.84	3920.21	3038.99	3892.73	3287.51	0
ADE12	1524.17	1847.19	2268.51	2529.53	2486.72	2814.6	2957.08	2604.77	3038.88	3334.81	3246.63	2667.68	0
ADE13	1743.03	1984.05	3734.67	3582.9	4117.84	3533.36	3661.86	2750.5	4133.66	4733.7	4777.8	4122.98	0
ADE16	1906.88	2090.87	1829.18	2243.46	2042.18	1503.11	1563.01	1988.92	1585.37	1749.77	1387.93	1023.1	0
ADE17	2298.24	2582.92	3211.41	3254.8	2993.12	3857.42	3865.94	4125.74	3893.51	4315.58	4623.86	4094.16	0
ADE2	2159.64	2272.06	3091.61	3903.47	3059.9	3390.91	3861.95	3081.29	3930.41	4296.62	4242.44	4036.96	0
ADE3	2185.28	2895.18	2877.34	3829.99	3086.25	3348.15	3579.89	3290.94	3384.45	4593.02	4544.04	5775.93	0
ADE4	78.73	48.7477	60.129	52.9147	80.7019	144.881	126.937	100.763	137.055	122.001	108.056	134.723	0
ADE5,7	3805.64	4488.65	4894.37	5490.81	5174.89	4458.17	4961.11	4545.84	5383.06	5532.65	5760.1	6274.95	0
ADE6	1877.93	2112.45	2688.99	3326.17	2237.63	1949.74	2113.07	1948.56	2353.65	3634.43	3189.41	3956.03	0
ADE8	985.332	1752.41	1324.63	2267.17	1924.76	1967.81	1916.99	2276.04	2690.29	3433.9	3293.33	2218.84	0
ADH1	9159.91	10498.8	10850.9	11161.8	11894.3	11350.7	11339.3	11504.8	11207.8	11191.9	11020	10288.5	0
ADH2	13270.2	17067.6	14248.1	14105.6	16107	12828.7	13798.2	13993.6	11683.6	250.341	203.699	180.687	0
ADH3	2546.8	2931.26	3128.65	2902.45	3158.16	3396.47	3610.01	3595.1	3842.82	4284.47	4242.45	4357.5	0
ADH4	1143.66	817.867	518.641	603.664	441.526	625.904	646.898	732.669	818.274	623.72	690.94	731.157	0
ADH5	1101.16	899.135	977.661	1347.25	1125.93	908.116	947.853	1006.45	674.034	710.555	570.515	555.702	0
ADH6	1163.21	1253.54	1777.86	2557.13	2886.13	4416.14	5082.74	4480.64	4736.07	3651.18	3713.65	2848.87	0
ADH7	38.0518	54.9638	44.4178	53.7835	40.8291	52.0913	44.7266	60.9577	55.3885	56.3456	51.2984	51.8566	10
ADK1	4948.02	5780.71	4889.63	4896.49	4872.91	5165.64	5586.97	5298.34	6140.76	5074.06	5130.84	5336.5	0
ADK2	284.477	362.649	149.865	289.862	296.457	333.322	335.388	330.703	451.136	320.011	258.688	145.743	0
ADO1	1510.15	3587.19	6551.1	7312.26	7729.08	6657.64	6161.77	7074.49	6391.43	6101.36	7052.56	6384.76	0
ADP1	1032.09	1286.52	1911.49	1704.82	2185.24	1560.41	1210.03	1195.35	1224.37	1623.18	1355.7	1076.95	0
ADR1	429.714	433.557	220.814	221.934	310.539	189.001	255.733	268.84	163.597	236.95	168.908	154.381	0
ADY2	2791.06	5461.16	4586.27	4826.9	4526.45	2731.11	2562.36	2766.78	4841.26	348.24	252.449	210.918	0
ADY3	194.564	171.701	133.803	118.239	122.124	90.9489	87.2038	95.0684	92.4206	84.7529	50.6704	65.6946	0
ADY4	321.171	241.309	171.45	141.903	115.481	136.417	145.07	213.449	193.064	131.328	96.5215	112.041	2
AEP1	121.994	145.608	182.677	186.419	198.417	186.016	191.107	157.785	170.282	177.199	193.345	170.142	0
AEP2	120.204	178.254	345.555	288.338	270.443	313.5	302.768	277.019	358.313	310.141	329.159	293.298	0
AFG1	780.245	1053.58	824.926	1001.28	706.794	832.923	791.356	1029.44	1243.91	1077.81	953.846	1322.44	0
AFG2	192.462	208.481	255.215	321.237	327.43	422.315	461.323	497.47	355.024	464.856	598.337	552.369	0
AFG3	846.503	815.31	517.28	706.931	851.782	888.823	1007.93	1172.46	1015.47	981.369	1130.53	1088.76	0
AFR1	542.327	734.885	310.205	343.369	400.989	204.862	207.481	221.01	145.029	239.677	101.924	143.012	0
AFT2	204.77	189.387	196.218	197.942	177.459	169.166	178.195	182.279	156.767	200.021	180.409	146.468	0
AGA1	357.745	433.502	173.84	209.452	210.105	183.574	197.882	291.265	228.243	198.074	245.11	283.026	0
AGA2	1259.47	782.398	481.322	466.143	475.325	380.116	366.304	325.668	515.958	360.796	491.615	721.674	0
AGC1	408.027	283.339	326.47	298.992	291.997	404.735	474.13	433.466	498.247	363.226	369.679	372.375	0
AGE1	330.142	234.947	209.561	132.36	136.849	144.578	146.972	165.779	143.577	135.345	153.896	182.671	0
AGE2	152.287	213.478	190.369	262.443	258.259	269.244	238.267	209.052	233.638	283.91	285.891	361.843	0
AGP1	1792.41	1500.21	363.467	539.984	409.564	383.652	392.064	468.038	314.95	1321.1	689.341	729.849	0
AGP2	113.413	141.23	76.0821	155.524	133.918	107.244	118.277	168.607	139.396	124.195	111.423	82.9288	1
AGP3	144.303	306.666	86.9478	87.4811	111.206	115.718	121.714	114.589	238.644	73.2881	53.1118	43.4793	0
AGX1	7732.25	9137.12	6638.05	7226.45	7902.67	7056.83	7205.86	7086.19	7945.38	4124.89	3820.66	3450.3	0
AHA1	5119.81	5235.83	2686.17	4107.99	3786.31	2728.06	2806.9	2366.88	2526.55	2043.85	1983.41	1676.1	0
AHC1	72.7722	121.165	104.993	119.861	157.515	76.0504	71.5186	79.1681	90.9714	118.847	139.855	121.375	0
AHP1	8680.96	8327.02	6414.57	7372.45	7102.08	5418.28	6213.48	7283.74	2769.06	5614.15	4663.54	6474.32	0
AHT1	67.1401	72.101	89.9903	107.119	66.952	107.276	71.1559	88.7603	101.311	104.752	92.4349	89.2219	3
AIP1	561.912	984.471	1466	1177.72	1017.15	792.797	896.108	888.975	571.678	1058.48	644.916	672.936	0
AIR1	46.99	38.9762	46.0883	50.5798	45.0428	62.3594	75.9978	46.1355	60.8124	22.188	67.6674	97.3888	2
AIR2	269.227	359.01	153.936	145.357	143.068	161.589	174.562	195.989	174.969	202.142	216.142	197.558	0
AKL1	443.646	512.385	401.625	476.467	541.991	325.071	368.432	383.807	246.075	475.398	435.413	396.798	0
AKR1	675.646	611.212	534.294	504.627	703.456	424.045	499.717	494.232	437.936	582.232	565.527	437.122	0
AKR2	440.177	387.109	334.723	426.497	521.849	330.044	345.306	371.759	171.503	174.106	182.723	144.669	0
ALA1	1992.56	2374.22	2531.76	2637.32	2295.8	2473.02	2807.83	2900.19	2403.82	3637.82	3400.73	3687.52	0
ALD1	47.5673	55.5245	109.728	159.808	114.154	113.209	87.8399	156.877	87.609	106.959	119.998	125.913	12
ALD2	257.196	323.014	283.789	295.306	435.093	188.333	197.38	204.09	84.0322	145.324	87.9237	86.4406	0
ALD3	451.693	319.371	423.283	550.304	708.788	244.939	260.709	254.711	79.9041	298.353	95.7202	100.166	0
ALD4	9981.7	10168.5	10978.5	10303.4	11275.8	9442.67	9470.74	9296.77	9398.1	4734.19	3225.42	3354.49	0
ALD5	1096.14	1264.39	1241.05	1611.03	1273.85	1523.21	1442.32	1338.41	1493.75	948.255	1015.79	537.103	0
ALD6	5136.67	5973.57	6487.77	6561.82	7598.41	6741.64	7093.44	5728.21	6198.19	6345.21	5384.04	4326.36	0
ALF1	203.505	265.477	84.8529	158.65	153.273	204.884	235.455	326.555	182.34	134.267	183.625	105.514	0
ALG1	490.501	588.424	364.965	446.274	352.449	380.286	447.57	404.311	312.482	404.67	364.011	267.846	0
ALG11	855.952	1306	817.78	842.838	863.198	898.315	988.825	1024.62	962.18	819.083	754.801	624.413	0
ALG2	671.752	530.754	524.29	442.141	305.4	349.359	325.174	570.975	392.824	671.82	502.205	791.49	0
ALG5	274.124	317.431	352.238	423.869	362.243	448.492	471.962	331.951	527.451	504.41	436.926	393.377	0
ALG6	1128.62	1413.12	1183.46	876.415	860.037	788.536	810.375	986.283	875.428	941.526	757.462	787.714	0
ALG7	209.837	327.226	440.7	395.256	574.709	536.944	485.236	547.766	402.599	484.598	487.19	485.66	0
ALG8	624.658	733.862	515.597	562.757	579.703	636.027	682.973	713.181	581.36	666.811	610.163	454.54	0
ALG9	1206.54	1357.26	1305.43	1212.97	1057.79	1040.73	1191.62	1243.13	1053.21	1027.58	1012.27	1166.03	0
ALK1	288.378	231.857	277.26	312.83	282.123	249.641	258.907	224.176	294.058	399.3	467.123	338.749	0
ALO1	256.001	321.98	443.042	739.815	661.905	725.325	713.814	718.504	903.346	692.167	901.024	763.508	0
ALP1	168.225	351.291	99.7158	119.783	128.95	67.3791	83.8779	71.684	97.4638	64.0488	64.7481	53.0562	0
ALR1	685.541	779.817	549.424	771.752	771.43	781.538	859.142	824.954	747.261	828.466	930.071	770.169	0
ALR2	204.971	164.242	124.133	162.029	123.455	123.982	131.843	113.085	135.32	144.833	147.13	132.986	0
AMA1	56.1807	33.5763	29.198	27.4743	23.3593	23.5507	23.9456	21.131	28.2493	27.3483	23.783	24.7492	5
AMD1	400.295	353.977	293.451	307.327	353.32	373.13	473.475	468.086	390.902	499.737	603.616	408.406	0
AMD2	569.497	548.47	321.772	291.451	224.147	185.444	187.062	188.786	216.393	154.156	118.256	112.881	0
AME1	90.5534	122.227	187.182	123.52	145.58	173.625	121.208	114.991	152.158	159.711	126.533	115.078	0
AMN1	1695.89	1296.76	2383.39	2845.28	1977.59	2150.82	2319.99	2170.63	2818.53	1858.75	2514.12	3046.36	0
AMS1	1878.17	1719.33	1545.99	1484.57	1731.93	861.809	825.387	866.99	308.619	186.94	152.794	174.163	0
ANB1	59.8584	39.9152	49.3982	63.2696	46.6573	46.7567	47.0648	68.5081	45.3978	66.1047	58.4829	64.7077	0
ANP1	522.045	592.575	555.216	341.431	732.194	193.879	207.165	237.645	354.85	267.755	322.299	272.541	0
ANT1	329.517	747.348	625.998	652.972	816.933	820.947	856.627	788.266	664.09	564.258	608.721	370.621	0
AOR1	341.109	339.814	266.931	384.748	264.187	283.126	300.37	283.679	322.069	246.393	285.117	362.628	0
AOS1	55.7659	55.1546	103.911	62.492	78.3964	58.0595	78.5054	34.4205	67.8052	51.4785	39.0616	50.0051	0
APA1	298.99	271.826	202.356	213.273	252.822	227.344	232.922	188.158	221.369	218.462	226.892	260.085	0
APA2	453.887	367.83	245.538	330.222	309.2	353.297	329.815	318.017	365.985	339.754	394.361	308.032	0
APC1	219.744	291.608	290.678	291.827	303.213	273.19	256.536	378.173	247.336	298.733	298.037	280.602	0
APC11	1743.65	1623.62	1181.54	1132.62	1105.36	1322.23	1384.16	1253.75	1489.55	1087.81	1242.77	894.596	0
APC2	27.7012	31.3385	41.107	40.7205	36.988	37.8273	45.3212	43.545	32.6285	47.7364	59.707	49.1453	0
APC4	201.711	207.796	169.036	214.707	219.109	140.625	173.851	149.858	155.114	143.344	118.206	90.0971	0
APC5	141.232	163.751	172.667	123.723	110.885	142.148	176.081	133.379	147.467	138.998	142.567	138.495	0
APC9	133.662	127.598	121.738	147.077	165.544	99.8863	98.6061	108.928	60.2742	104.158	74.183	61.4667	0
APD1	450.395	536.109	476.952	638.151	710.267	437.627	599.724	305.921	605.357	831.107	544.131	382.006	0
APE2	1517.21	1570.92	1729.01	1750.96	1805.43	1414.97	1556.43	1820.54	1024.95	1416.86	1246.97	821.797	0
APE3	3699.74	5793.73	5088.87	5796.74	7223.61	4325.16	5246.03	3990.22	3695.83	3827.83	2694.16	3063.03	0
API2	53.1908	54.1746	45.2006	56.2227	25.0451	43.0366	32.0333	57.9806	45.7579	52.2155	38.7847	41.4887	12
APJ1	482.209	493.062	314.664	383.246	400.736	311.985	294.16	368.47	227.448	201.589	192.999	204.031	0
APL1	217.817	96.5675	438.982	452.18	359.91	349.446	329.108	298.048	356.124	383.615	360.974	359.448	1
APL2	1911.14	1352.08	1858.53	1533.8	1231.38	1103.34	1225.9	1561.32	1292.62	1413.77	1303.32	1397.19	0
APL3	77.0271	130.452	94.2835	117.541	116.145	119.221	133.554	132	128.835	119.017	117.413	143.935	0
APL4	824.956	1091.21	885.56	818.115	770.452	923.396	1000.36	1161.98	856.397	1216.75	1091.44	777.688	0
APL5	118.89	177.91	298.939	141.851	183.792	142.699	150.107	109.173	98.8356	130.725	98.1732	120.441	0
APL6	748.037	768.993	654.55	729.687	524.763	520.538	525.55	605.762	448.156	659.882	557.76	547.612	0
APM1	116.749	144.395	96.9271	106.298	127.647	147.337	174.584	121.087	115.878	117.593	124.949	124.144	0
APM2	344.507	265.458	179.996	291.923	214.97	216.922	208.991	203.364	208.687	261.002	227.781	225.466	0
APM3	433.619	467.514	491.79	589.597	541.647	480.307	595.267	426.978	524.998	508.851	457.465	353.874	0
APM4	607.604	776.989	532.365	619.046	619.71	664.039	791.785	754.983	770.239	620.283	602.851	542.565	0
APN1	279.219	231.221	228.238	641.127	763.193	571.488	496.772	278.647	191.951	582.191	742.962	528.772	0
APN2	196.357	210.465	181.127	193.35	180.666	178.929	174.847	172.047	181.28	170.581	168.692	177.453	0
APP1	361.427	375.608	273.481	296.533	313.017	304.25	303.765	396.238	255.872	308.662	271.56	364.53	0
APP2	16.2393	8.8727	13.0799	16.0262	20.5269	8.5156	11.219	11.5859	12.3246	11.6557	11.0105	7.4715	4
APS1	825.876	656.43	843.561	757.325	708.767	436.824	501.071	511.414	750.285	736.746	717.235	548.12	0
APS2	517.117	441.161	837.367	701.031	839.138	902.121	899.435	1011.21	596.065	1009.68	828.422	474.125	0
APS3	126.675	52.021	128.348	134.925	142.472	124.055	134.284	124.594	127.297	127.771	163.035	160.41	0
APT1	1576.83	1798.27	2767.04	2306.99	2488.95	2826.55	2953.01	2980.74	3022.49	1810.87	2387.39	1689.8	0
APT2	1725.86	1361.73	531.602	779.825	683.448	683.577	713.742	730.497	753.795	480.225	649.116	823.407	0
AQR1	82.251	35.1944	63.3931	68.3769	54.4776	37.2697	44.0395	52.6104	36.6488	28.9561	47.8439	61.5067	3
AQY1	315.503	618.51	1269.18	2235.17	1653.82	1071.12	887.73	1038.81	809.721	1138.22	1209.39	1138.62	3
AQY2	733.282	1348.44	867.054	954.981	1024.75	1236.94	1760.68	2230.78	1592.11	610.788	700.498	298.741	0
ARA1	4516.26	5209.42	4537.25	5064.23	5087.99	3730.06	4177.9	3316.31	3563.86	3159.99	2072.87	1792.78	0
ARC1	2442.38	2549.79	1972.32	2436.22	2343.15	2969.53	2980.66	2507.36	2717.78	3377.81	3581.59	3560.46	0
ARC15	5028.5	5243.89	3724.99	5508.2	4992.42	3987.26	3879.04	3651.76	4034.26	4387.5	3327.09	2985.7	0
ARC18	1084.81	1259.77	1181.8	1240.62	1452.4	999.43	1097.64	1134.12	795.368	889.513	856.031	845.781	0
ARC19	394.744	429.595	726.729	729.051	874.607	786.073	912.295	700.346	572.866	727.007	641.515	381.817	0
ARC35	2031.04	2894.33	2767.21	2865.97	2579.13	2183.63	2580.77	2506.94	2337.21	2092.82	1860.51	2137.48	0
ARC40	948.744	786.363	920.233	912.22	830.666	927.766	930.207	1015.97	907.375	1153.56	1087.42	1289.55	0
ARD1	143.034	153.789	161.062	178.158	198.45	270.635	240.458	204.055	249.557	265.829	330.841	368.629	0
ARE1	548.739	820.707	228.257	475.287	477.324	478.933	556.89	696.83	333.088	477.403	544.655	476.165	0
ARE2	179.135	148.271	127.88	173.603	91.3975	121.414	152.061	166.466	116.157	168.037	153.081	177.06	1
ARF1	11322.4	9846.81	11364.9	11160.8	9383.7	10536.6	12397.5	11792.5	12756	13067.2	13773.4	14378.5	0
ARF2	7677.47	6846	7420.65	7397.44	7021.88	6326.04	6728.41	6338.46	6797.94	6282.11	6200.92	5674.98	0
ARF3	427.457	393.383	557.61	507.169	427.41	577.95	630.588	411.534	645.227	507.113	569.047	465.335	0
ARG1	6670.23	5254.3	5938.32	6299.84	5859.07	5550.4	6400.78	6295.72	3996.36	4212.81	4488.07	4161.62	0
ARG2	457.658	393.578	521.887	565.795	484.716	592.95	578.597	660.795	480.892	437.901	486.05	355.713	0
ARG3	770.186	1025.23	3599.48	2947.35	2880.16	2338.36	2754.98	2756.21	2373.84	2185.39	2258.58	2867.87	0
ARG4	4401.88	3342.4	4500.99	5179.08	4674.58	4951.74	4597.49	4488.64	3963.61	3304.98	3589.08	2333.77	0
ARG5,6	3793.26	3697.32	4216.57	5148.66	4697.71	4289.99	4214.46	4550.9	3861.21	4049.42	3912.45	3864.74	0
ARG8	129.836	186.814	268.095	492.711	404.253	389.636	429.428	220.019	211	233.477	231.835	188.042	0
ARG80	243.578	307.547	141.949	153.145	121.105	114.091	145.85	171.967	163.046	122.06	140.464	149.869	0
ARG81	148.116	182.546	186.003	182.689	130.672	136.051	172.386	165.609	128.202	129.505	135.571	139.358	0
ARG82	441.512	403.89	337.632	367.944	376.04	237.731	290.688	140.784	208.193	386.419	214.842	171.897	0
ARH1	408.36	471.949	267.241	300.685	244.221	409.105	431.311	445.105	562.249	536.611	436.474	429.534	0
ARK1	49.767	43.5556	44.8418	54.9283	50.5901	44.5957	63.4586	52.4369	36.0855	43.3015	39.3461	47.5068	1
ARL1	1626.4	1705.46	1865.5	1501.03	1146.27	1878.29	2113.99	2099.83	2613.39	2065.92	1483.65	1539.62	0
ARL3	1724.66	1145.63	781.552	575.87	559.159	520.253	731.41	679.28	807.944	543.275	433.977	343.032	0
ARN1	2792.21	1499.31	732.339	800.093	1140.75	340.649	327.648	324.89	478.117	756.578	1049.48	859.167	0
ARN2	28.6561	31.1063	30.3041	27.7014	23.2685	25.3778	24.9635	36.9754	33.1654	31.7478	26.9663	27.427	12
ARO1	2442.79	2611.14	2229.02	2848.82	2337.4	1773.33	1945.97	2165.89	1704.46	2189.8	2049.42	2485.05	0
ARO10	575.12	505.758	409.355	501.515	396.926	261.097	227.377	315.511	56.8713	36.6018	21.1173	23.5929	2
ARO2	3777.64	3917.18	5011.25	6142.97	4380.28	4670.01	5133.96	4980.95	4320.66	5706.36	6396.79	7429.01	0
ARO3	1156.07	1508.75	1823.44	2629.15	2149.05	1904.95	2015.79	2030.62	1218.8	1402.12	1459.65	1177.35	0
ARO4	2240.37	2299.39	3026.02	4504.35	3583.44	1762.69	3393.08	1986.49	3052.08	3701.61	3382.31	3164.3	0
ARO7	69.9037	107.447	146.662	137.375	140.929	210.705	199.04	195.317	263.396	159.165	227.055	134.484	0
ARO8	2088.63	1632.48	2210.55	4022.3	3046.52	3380.75	4017.73	3775.59	3267.78	3649.08	3799.11	3071.75	0
ARO80	28.585	32.5077	29.25	32.0033	31.3737	26.6075	29.6246	25.83	14.4966	15.7089	18.5075	16.3369	0
ARO9	940.456	1028.68	859.239	1052.2	925.186	806.567	767.641	907.459	497.314	72.1006	49.5622	50.792	0
ARP1	152.304	109.115	124.519	153.965	127.433	146.418	163.16	122.923	174.679	126.959	163.481	163.13	0
ARP10	67.622	68.293	58.7853	73.2785	41.9895	65.0984	63.8303	60.9313	68.1865	61.8699	51.9357	50.8031	1
ARP2	2506.75	2890.23	2650.3	3254.34	2886.31	2550.39	2624.53	2300.24	2532.85	2688.09	2504.23	2203.59	0
ARP3	1732.61	1898.91	2395.85	3220.86	2382.25	2167.64	2229.93	2821.66	2028.21	2838.87	2560.56	3428.73	0
ARP4	964.771	721.284	719.743	849.337	1097.15	930.243	1143.06	1177.43	874.153	677.675	921.445	449.773	0
ARP5	318.08	364.934	514.288	367.926	347.844	276.924	359.86	313.659	309.189	352.826	338.403	526.285	0
ARP6	460.927	594.374	568.166	909.515	671.962	588.062	618.317	698.091	467.752	555.762	521.476	398.235	0
ARP7	49.6269	79.2111	99.4441	117.135	140.176	130.841	113.203	143.534	166.785	178.548	289.212	247.101	0
ARP8	293.379	356.518	243.962	272.198	282.896	295.497	347.562	356.102	263.719	206.461	267.819	224.032	0
ARP9	494.789	545.681	1048.5	873.863	685.572	734.508	778.547	821.468	769.281	920.166	793.359	787.749	0
ARR1	752.384	1056.31	337.133	490.491	455.848	493.172	525.522	559.379	407.18	563.77	479.331	329.988	0
ARR2	88.2813	75.895	43.1869	55.578	58.7346	49.5675	66.5452	54.6816	49.5273	26.0344	28.2248	22.0655	3
ARR3	17.1871	14.5338	10.7718	12.6559	11.1506	12.5268	2.069	11.3792	16.3441	11.5173	10.4763	9.1383	12
ARR4	1172.57	1008.3	1175.77	1006.76	1182.58	1379.85	1299.39	1045.56	1108.58	1058.99	981.074	586.48	0
ARV1	154.187	146.251	102.167	101.054	120.569	123.675	141.293	142.622	112.503	130.341	116.613	76.8745	0
ARX1	480.622	443.022	468.236	410.773	385.029	568.385	665.368	637.883	628.661	404.508	719.626	671.727	0
ASC1	17603.9	20689.8	17798.9	17408.3	19425.5	21398	22991.4	23201.6	20184.9	19851.4	18812.5	14768	0
ASE1	107.193	120.545	90.0321	141.649	180.863	109.017	129.428	55.1729	106.739	137.972	151.072	108.573	0
ASF1	737.029	512.038	715.559	415.174	373.755	480.956	596.991	738.653	753.682	650.489	815.3	935.182	0
ASF2	942.434	902.737	278.775	455.834	430.446	359.744	387.67	533.068	382.338	438.06	465.405	533.341	0
ASG7	343.452	305.925	172.707	198.375	140.746	135.062	114.889	232.296	176.098	199.587	168.582	175.295	4
ASH1	917.056	622.767	950.643	1266.22	1121.89	850.522	771.284	812.501	703.903	855.818	889.302	1211.9	0
ASI1	311.57	280.331	282.618	292.218	340.197	300.97	404.094	341.08	279.378	388.625	291.742	198.921	0
ASI2	229.835	411.402	124.832	164.843	250.969	161.077	170.236	171.003	104.531	204.809	117.105	89.8022	0
ASI3	572.465	697.869	669.825	565.324	467.475	525.735	623.771	709.734	516.761	378.255	344.168	326.726	0
ASK1	1663.09	1072.03	485.79	758.042	607.782	734.639	835.721	1162.7	775.898	627.791	720.982	674.536	0
ASK10	634.364	447.145	411.958	525.306	468.527	337.192	362.209	419.844	352.165	468.992	488.955	466.896	0
ASM4	824.19	536.031	414.871	615.418	487.337	541.088	641.183	550.8	694.252	669.285	604.773	556.826	0
ASN1	1883.97	1965.1	2843.31	3470.84	2548.49	2727.08	3032.98	3196.26	2177.31	1770.21	2367.34	2903.17	0
ASN2	1041.37	877.833	1523.01	2516.19	2252.72	2588.27	2888.27	1280.41	2487.03	2921.67	3264.97	2514.81	0
ASP1	1614.01	1655.76	1039.89	1191.24	1065.24	1856.92	1903.18	2317.42	2240.59	2133.44	2240.44	1733.49	0
ASP3-1	3967.58	5012.64	3683.84	4946.29	4447.08	4016.85	3731.21	4622.21	4752.65	4914.1	4964.87	3552.38	0
AST1	255.395	290.965	128.41	200.807	201.417	271.236	254.993	187.991	256.725	273.144	251.15	247.798	0
AST2	282.268	220.332	196.244	186.123	204.793	175.676	173.336	123.696	156.931	136.937	102.425	104.126	0
ATC1	89.6508	79.65	80.494	83.9864	66.9279	115.893	119.116	114.321	155.379	56.4238	161.505	192.288	0
ATE1	293.438	311.137	194.328	63.6599	204.376	215.07	213.635	198.313	188.282	179.341	205.447	180.197	0
ATF1	162.951	170.016	129.413	160.078	173.274	164.02	172.6	164.428	130.444	178.703	100.683	65.9354	0
ATF2	113.889	86.1852	142.858	200.293	143.122	336.397	382.196	358.432	199.329	133.733	198.211	182.744	0
ATG1	1036.13	720.879	484.171	504.063	626.802	332.942	336.149	343.114	134.145	189.492	103.21	146.054	0
ATG10	827.521	496.443	436.614	429.115	334.208	610.37	608.044	668.312	587.701	512.583	711.78	674.751	0
ATG11	127.979	185.819	115.403	110.151	134.916	105.383	122.686	136.889	84.0459	77.5108	84.2786	55.0639	1
ATG12	401.318	349.877	355.285	358.274	336.35	191.546	250.585	112.107	294.392	256.7	225.511	219.083	0
ATG13	400.892	439.648	412.364	395.93	531.983	288.724	316.75	324.675	265.646	257.991	319.935	283.257	0
ATG14	121.853	116.05	106.91	99.5897	93.0652	67.2804	72.4319	64.6287	57.4066	78.0341	43.4491	40.7499	0
ATG15	120.058	396.376	33.2349	51.6849	75.2347	39.5012	63.5921	111.929	42.3892	58.1559	46.359	33.3266	6
ATG16	18.8249	24.5791	26.0077	22.4694	35.0421	22.8857	22.5396	20.1194	16.3497	16.8045	15.4331	12.6371	9
ATG17	200.781	150.874	263.865	191.162	190.118	140.635	139.85	139.178	132.033	111.187	93.7827	82.4773	0
ATG18	227.637	239.214	136.425	254.043	203.133	164.51	181.674	188.618	164.104	190.889	205.206	249.591	0
ATG19	1030.27	1558.91	981.174	1036.45	1064.06	854.207	839.259	1179.8	658.22	842.124	587.345	644.285	0
ATG2	66.7872	122.868	155.26	172.628	165.944	128.208	129.936	171.156	136.154	150.309	143.24	167.982	0
ATG20	91.358	91.2183	62.1216	57.4995	78.2558	58.2034	54.6156	50.4479	38.5231	84.0687	32.3257	30.6696	0
ATG21	166.088	266.899	464.712	376.205	310.928	332.092	225.288	283.679	315.159	298.059	270.58	252.298	0
ATG22	411.424	415.966	347.208	377.303	408.336	235.822	256.578	245.568	166.919	194.605	142.526	173.126	0
ATG23	288.942	193.689	161.258	165.677	162.334	114.192	130.601	129.192	99.1859	54.805	70.9408	72.7729	0
ATG26	281.442	316.07	244.97	342.688	347.064	278.153	280.264	361.393	167.461	197.501	179.867	143.682	0
ATG27	923.128	668.189	1007.82	1190.76	1565.93	1112.16	1204.97	1300.14	862.623	1190.66	1180.41	593.264	0
ATG3	691.681	408.585	329.498	343.383	341.418	302.349	447.14	305.69	291.998	352.666	258.88	191.896	0
ATG4	121.206	118.324	96.242	88.2344	80.8748	69.0739	71.3352	76.1293	38.2768	65.597	39.2467	36.319	1
ATG5	1002.38	676.593	515.07	539.082	440.884	617.588	714.199	588.382	713.97	487.731	395.826	319.74	0
ATG7	527.164	486.29	341.205	487.748	401.705	226.367	222.317	250.77	152.93	275.717	127.716	93.2015	0
ATG8	2917.18	2908.33	2485.89	1735.4	1571.7	938.166	1134.52	949.421	725.306	1018.44	397.288	418.649	0
ATG9	248.432	196.425	193.766	170.266	178.115	83.8301	115.322	142.388	84.6926	166.385	106.859	115.06	1
ATH1	1340.64	2221.54	1491.72	1465.63	1273.39	883.194	886.532	1041.34	551.122	403.481	253.474	276.584	0
ATM1	512.726	600.877	546.831	672.769	517.065	634.558	768.957	802.261	713.29	733.514	947.867	1060.87	0
ATO3	5824.91	6581.1	3680.36	4256.7	4034.71	3115.14	3634.39	3077.73	3176.94	153.58	164.047	279.738	0
ATP1	4546.2	4931.4	5005.08	5492	5422.85	5224.28	5628.52	5702.47	5346.87	5739.09	5379.47	6366.91	0
ATP10	42.5827	34.8207	20.3166	23.4893	24.6667	34.191	36.1469	46.2207	43.2285	35.8982	54.548	26.4458	2
ATP11	1480.37	1454.14	1484.38	1381.28	1459.35	1826.02	1810.16	2083.14	2215.17	2123.63	1548.57	1471.03	0
ATP12	327.652	250.07	499.337	536.788	414.182	575.844	567.477	668.825	783.991	802.718	758.437	640.244	0
ATP14	3550.44	3252.01	4613.51	4376.67	5309.73	4150.2	4396.14	4492.21	4765.15	3962.62	4595.48	4555.47	0
ATP15	7048.67	7703.47	8180.6	7748.41	7072.68	6762.36	6609.06	7579.04	6905.98	6795.9	6680.61	7688.81	0
ATP16	3464.63	3817.38	4330.07	4029.22	4343.66	4974.66	5091.74	5016.37	4855.95	4765.89	4356.72	4166.82	0
ATP17	4086.44	3711.89	3196.06	3186.96	3345.18	3436.15	3443.68	3368.31	3649.94	3100.47	2634.3	1724.79	0
ATP18	6813.76	5703.77	7558.97	7231.22	7522.41	6692.83	7507.19	7330.66	6509.86	6346.4	7255.33	7036.04	0
ATP2	3539	3205.21	4906.67	5094.77	6623.17	5646.34	6076.41	5828.35	5173.1	4780.02	5748.02	4455.81	0
ATP20	842.704	1118.49	1919.52	1448.14	1676.81	2268.81	2119.36	1900.56	2281.52	2412.35	2312.24	2373.62	0
ATP3	2932.79	3420.62	3620.57	3138.85	3816.93	4198.59	4321.75	4181.34	4207.33	3663.79	3577.55	3424.52	0
ATP4	2853.45	3580.54	3751.59	3167.96	3762	3668.87	3414.16	3421.16	3447.8	2516.42	2757.01	2455.67	0
ATP5	1755.73	1794.97	1889.56	1502.73	2101.29	2522.96	2533.44	2252.42	2811.35	2302.17	2048.04	1441.63	0
ATP6	25.1496	27.1802	17.5923	15.8979	14.7791	16.7394	23.4598	26.3581	25.8678	22.5369	19.7737	35.5151	9
ATP7	3098.66	3075.75	4423.43	4604.26	4824.71	4411.53	4227.74	4143.33	4132.56	3657.12	3570.93	3024.67	0
ATR1	191.283	239.515	553.838	635.33	650.085	467.735	468.54	343.441	377.407	504.615	772.26	495.901	0
ATS1	515.48	646.82	342.073	523.867	556.87	560.973	614.15	991.68	673.73	699.494	873.716	548.179	0
ATX1	5381.68	4604.76	5255.5	5406.21	5117.02	5042.96	5029.72	5309.45	6305.55	6425.51	5473.57	5655.64	0
ATX2	326.182	440.804	535.892	423.648	344.952	477.506	496.553	517.148	630.461	611.267	528.358	519.721	0
AUR1	1227.88	1190.3	1318	1177.16	1180.78	1499.69	1574.22	1831.33	1587.28	1389.35	1742.27	2037.93	0
AUS1	155.233	209.321	212.325	243.043	211.878	147.831	163.583	185.772	134.409	175.631	157.935	167.529	0
AVO1	38.0408	61.0175	61.6274	95.5111	88.3795	78.9565	79.9999	82.9048	55.1048	53.2153	88.0656	60.5444	0
AVO2	483.315	482.89	187.372	284.722	263.685	297.167	261.145	449.705	238.018	237.649	240.319	277.549	0
AVT1	456.335	802.302	1576.76	1429.22	1404.06	1512.53	1404.69	1634.31	1383.9	1443.24	1301.38	1312.36	0
AVT2	189.659	155.932	138.758	162.69	139.398	130.713	168.539	120.211	149.898	134.626	129.542	111.754	0
AVT3	1421.15	2257.67	1489.59	1922.51	2008.76	1698.75	1847.82	2277.18	1652.18	2080.87	1857.57	1647.38	0
AVT4	418.621	374.68	447.177	465.895	532.022	468.713	562.278	491.922	398.463	587.587	678.361	438.05	0
AVT5	318.949	462.59	374.105	360.526	352.315	337.674	359.978	426.479	357.406	469.405	379.621	299.49	0
AVT6	451.161	796.915	215.535	271.434	432.684	446.122	466.251	501.959	331.432	450.766	471.395	361.178	0
AVT7	1047.62	1030.01	851.762	964.163	909.295	748.833	701.229	521.122	820.739	920.116	886.347	686.549	0
AXL1	140.291	261.061	219.017	280.024	214.912	208.326	183.573	228.426	154.357	179.939	130.615	175.945	0
AXL2	158.888	139.969	160.449	120.623	121.071	151.618	131.454	99.3737	147.514	117.469	136.521	204.418	0
AYR1	6413.63	5033.92	3564.93	4803.62	5267.37	3064.21	2825.79	2637.98	2741.15	2292.91	1981.73	1168.03	0
AYT1	42.3154	26.9785	29.2799	46.4311	34.8621	34.0374	33.3852	47.6935	42.7951	43.2046	46.0621	46.6044	12
AZF1	123.853	137.23	82.1321	89.5241	115.338	99.2936	107.054	125.155	80.3541	76.3354	83.2791	72.6487	0
AZR1	68.6528	55.951	122.466	234.119	96.4638	194.479	117.839	113.475	172.834	289.616	195.42	186.232	0
BAG7	284.499	241.767	102.746	109.474	120.743	78.2476	86.0976	154.231	57.8368	74.0946	50.5525	40.9708	5
BAP2	3871.02	1901.62	1007.13	1453.62	1256.36	948.308	1121.19	1080.29	564.454	485.344	219.422	190.858	0
BAP3	127.354	34.7297	25.8947	44.0192	26.2877	25.5576	24.2241	21.4589	29.8802	150.613	95.3484	82.6425	3
BAR1	366.665	240.223	187.139	316.991	255.163	322.269	293.076	228.628	358.41	547.932	601.627	574.141	0
BAS1	18.772	25.8467	142.403	90.5902	111.251	76.4553	62.6872	65.1424	67.2352	40.476	99.1601	127.58	1
BAT1	3580.86	2625.44	2717.23	2963.74	1844.81	2982.56	2892.59	2769.35	3375.42	3239.86	3561.77	4328.76	0
BAT2	3058.07	1642.54	2262.2	2320.73	2403.42	2863.26	3221.08	3296.19	3120.43	979.697	764.326	766.568	0
BBC1	109.299	142.638	70.5602	90.8901	120.829	69.8684	87.5688	145.364	80.1686	100.551	93.1253	70.1633	4
BBP1	51.0402	64.7416	70.6842	59.75	51.1209	77.6383	84.6243	85.8071	43.9094	78.2553	109.306	102.486	1
BCD1	156.365	161.587	97.7492	98.9464	78.452	102.156	97.2999	104.269	157.113	64.3474	100.76	139.59	0
BCK1	94.8892	72.0371	242.624	239.385	218.603	139.049	128.522	123.712	110.724	224.708	240.363	250.663	0
BCK2	399.367	359.757	445.724	371.275	302.023	195.231	172.305	229.847	226.047	169.213	151.95	278.334	0
BCP1	603.895	347.964	505.022	445.652	307.067	602.296	774.402	477.664	842.435	470.859	595.336	415.16	0
BCS1	552.039	436.867	378.884	538.745	558.755	835.593	807.617	943.962	1143.31	899.762	964.5	1001.03	0
BCY1	2140.66	2601.31	1428.72	2197.44	2758.7	1324.1	1292.3	570.005	1233.24	1346.99	1090.2	1164.59	0
BDF1	1678.54	1516.18	1494.27	1463.51	1204.06	908.911	1159.73	1658.87	1017.12	1202.47	962.137	1489.34	0
BDF2	164.511	114.547	236.271	115.564	182.584	114.205	91.0647	78.3458	72.0277	145.714	75.8941	84.4083	0
BDH1	2859.45	1317.56	3388.85	3671.62	4429.19	3320.66	3158.37	3768.8	3701.26	4142.65	4348.73	3766.78	0
BDP1	238.664	277.645	294.61	269.376	286.801	267.816	249.826	293.801	318.426	287.642	339.601	401.29	0
BEM1	458.956	417.395	198.853	253.209	252.528	309.102	364.805	451.472	376.48	216.483	260.369	226.627	0
BEM2	618.098	562.527	904.304	839.48	886.428	653.984	703.719	319.927	549.009	960.911	650.322	643.226	0
BEM3	196.737	236.695	302.598	261.369	320.517	257.187	296.673	316.559	206.8	371.638	338.734	353.083	0
BEM4	346.832	328.846	287.112	355.918	409.855	366.458	419.994	281.199	364.144	311.363	306.341	209.381	0
BET1	581.068	470.332	402.831	428.458	508.235	621.424	492.399	386.056	547.805	331.181	327.916	245.894	0
BET2	822.955	662.775	464.719	535.637	492.735	557.916	710.087	577.858	706.703	592.757	543.378	413.525	0
BET3	1196.41	836.109	1182.49	2539.32	2443.67	1328.69	1055.4	597.485	1277.28	1837.04	1885.17	1641.85	0
BET4	43.8006	43.8913	78.2124	55.7717	66.1473	64.5116	72.5807	67.4851	67.6519	75.3153	50.8448	46.8849	0
BET5	1030.45	585.816	931.61	706.992	592.703	974.89	1155.43	957.123	1197.83	813.58	1137.74	1168.5	0
BFA1	45.6012	35.3601	34.5453	36.4129	30.4111	31.0674	35.0856	59.8817	36.275	42.9016	45.788	34.5074	10
BFR1	568.594	579.476	965.411	930.668	1074.32	1078.79	1206.71	1109.2	857.168	1221.39	982.647	1144.11	0
BFR2	174.668	92.2906	152.252	137.364	139.618	232.617	222.642	183.824	280.668	90.0576	274.939	315.473	0
BGL2	6143.59	4994.75	4735.03	4121.99	4998.75	4580.12	4056.7	3930.28	3627.28	3658.71	3806.8	3645.74	0
BI3	17.7012	27.3595	19.8272	11.861	10.7554	13.4376	13.984	18.1028	20.8808	29.9816	18.2612	45.2282	10
BI4	9.9379	5.977	4.3693	4.3763	3.1787	3.2811	7.2896	7.1403	7.3826	2.5986	4.8608	4.3198	12
BIG1	1199.98	943.882	426.5	663.715	678.91	587.495	599.303	643.991	596.445	506.994	544.723	385.974	0
BIK1	293.033	430.581	254.023	411.166	383.577	329.723	350.747	261.04	357.256	192.118	288.913	286.693	0
BIM1	274.071	277.136	167.276	208.32	168.769	255.055	264.505	263.246	343.91	189.689	213.197	213.509	0
BIO2	1063.3	807.762	771.487	839.117	1009.72	1435.11	1097.21	968.471	1725.9	1185.87	1392.49	876.289	0
BIO3	259.056	423.182	379.845	420.781	330.11	341.722	331.397	408.771	280.785	122.581	129.487	147.34	0
BIO4	428.544	1092.94	625.897	871.091	674.399	767.491	741.362	955.846	877.621	559.187	383.071	309.427	0
BIO5	94.42	207.152	236.753	226.029	172.448	206.82	230.707	268.678	190.922	76.1799	84.4964	81.8576	0
BIR1	139.998	99.4694	179.419	159.765	161.81	131.265	153.13	168.963	110.404	105.358	125.422	98.5033	0
BIT61	15.7587	9.1392	35.3076	36.8252	30.3018	23.1768	7.4593	12.9308	18.1653	24.2921	30.3261	34.7185	5
BLM3	385.855	642.152	104.172	233.825	455.67	226.3	305.375	322.64	212.607	192.41	269.891	98.0352	0
BMH1	6733.62	5235.73	5476.19	4735.93	4600.87	3775.86	4196.31	3693.37	4618.51	3678.61	3678.08	3339.13	0
BMH2	2269.66	2760.95	2374.23	1408.71	2847.73	1233.99	1306.13	1644.32	1281.37	1442.59	1225.84	841.727	0
BMS1	382.622	365.032	393.215	319.529	329.026	465.308	472.489	484.493	533.015	610.905	620.666	810.303	0
BNA1	2737.19	1910.61	2904.97	3059.39	2771.16	3882.7	4189.61	4360.12	2354.52	1887.56	2078.29	1486.93	0
BNA2	577.695	258.848	255.56	441.035	437.214	640.268	708.871	725.629	549.845	222.645	244.394	256.404	0
BNA3	1365.78	589.583	2516.17	2661.92	2623.95	2019.94	1840.73	1755.66	2247.54	2152.75	1927.83	2118.46	0
BNA4	497.688	602.655	553.909	688.572	1026.93	1158.41	1199.7	1104.85	884.369	666.935	598.001	296.193	0
BNA5	1561.44	1102.33	1030.23	1385.99	1142	830.007	916.193	982.691	824.568	828.618	684.982	560.583	0
BNA6	1185.73	1946.32	1451.11	2681.11	2082.04	1894.02	1962.79	1178.61	1977.39	2326.37	1796.86	1708.75	0
BNI1	141.548	161.851	482.718	359.262	424.056	248.06	225.541	288.721	232.267	313.145	574.808	676.301	0
BNI4	379.124	405.128	391.947	343.724	337.275	377.385	475.746	462.835	416.145	441.304	535.933	540.999	0
BNI5	246.295	242.01	269.648	376.089	392.682	292.349	398.268	293.493	324.258	338.686	493.01	369.516	0
BNR1	98.8855	81.749	119.557	87.0352	60.1715	78.4276	70.1695	60.7996	92.3395	125.582	87.3475	173.48	1
BNS1	348.32	284.764	411.273	424.155	416.969	303.353	220.068	162.67	274.641	179.655	102.188	96.489	0
BOI1	363.592	466.939	579.996	514.281	509.565	469.661	432.683	613.632	491.262	690.223	673.309	814.796	0
BOI2	395.404	433.903	361.373	364.932	375.54	282.153	304.092	335.206	216.257	303.939	342.513	369.274	0
BOS1	414.743	504.941	493.877	475.962	532.913	671.394	679.294	697.472	606.827	554.972	587.113	473.928	0
BPH1	206.552	238.322	174.452	156.805	189.376	139.696	153.738	158.704	142.767	125.189	107.226	105.44	0
BPL1	35.507	52.2703	30.9999	42.3829	52.8964	49.1889	57.1409	43.7753	31.867	43.5658	58.4312	65.2252	0
BPT1	776.489	899.351	1110.1	868.781	974.544	556.91	678.622	680.731	460.32	491.047	474.837	385.175	0
BRE1	78.1718	105.734	143.719	120.141	116.808	133.696	123.773	91.6125	121.059	117.517	127.318	146.32	0
BRE2	91.9471	91.8289	132.948	100.228	116.967	104.104	119.42	93.4575	109.354	96.7938	109.87	80.79	0
BRE4	839.724	744.317	571.773	564.29	425.453	526.219	538.092	614.786	818.44	570.736	536.873	603.545	0
BRE5	80.3276	79.2782	112.739	102.482	75.9277	93.1595	107.196	151.582	119.142	103.484	189.346	369.688	0
BRF1	552.029	617.451	605.546	575.249	565.809	436.579	479.516	384.909	435.379	375.351	370.257	393.154	0
BRN1	14.204	19.5887	13.3718	13.1436	12.4585	13.9688	12.1381	18.4308	18.4157	15.2651	15.5648	13.9294	11
BRO1	307.733	357.753	284.866	375.033	303.072	294.669	347.134	304.997	293.712	246.908	226.558	339.118	0
BRR1	410.204	587.825	394.078	481.389	430.108	474.584	442.753	504.074	485.008	523.068	552.685	477.709	0
BRR2	163.313	189.225	269.093	180.813	165.399	175.677	165.399	160.208	164.395	203.577	162.43	194.995	0
BRR6	1654.52	1349.11	762.715	758.054	596.603	639.633	691.599	742.815	751.003	777.595	645.786	629.711	0
BRX1	513	499.998	1297.04	1017.61	863.641	1391.09	1347.26	1318.35	1554.17	1217.53	1610.44	1482.93	0
BSC1	62.8332	70.0014	36.5571	23.7208	25.3994	30.9033	27.0403	48.6649	31.1827	39.6436	39.6494	29.257	12
BSC2	515.906	684.303	634.209	656.646	899.747	316.378	324.586	209.684	141.568	183.77	93.7504	89.9821	0
BSC3	23.6084	23.281	25.0842	23.4114	17.2349	20.9512	20.1762	23.9433	35.1532	22.99	25.6724	26.5349	4
BSC4	151.18	117.534	82.9303	107.291	96.3586	81.5514	89.5099	132.175	113.39	149.322	117.483	111.492	8
BSC5	99.0986	58.0263	40.0495	51.2034	76.5671	55.0719	67.0218	89.1651	41.7598	30.5766	33.706	21.7342	6
BSC6	222.058	129.305	117.371	181.377	109.589	156.264	158.861	218.632	157.332	145.91	197.431	185.246	0
BSD2	244.302	395.258	264.973	281.947	376.892	299.758	277.307	203.334	212.174	308.857	212.951	160.701	0
BSP1	96.4322	194.883	125.202	178.438	161.834	148.903	170.033	165.016	121.805	138.745	167.238	223.073	0
BST1	171.965	141.376	163.653	127.594	136.268	148.8	190.392	149.669	154.951	157.81	151.774	178.218	0
BTN2	4817.89	2594.62	2452.39	1835.05	1583.48	895.011	949.461	1128.86	615.123	537.43	382.657	562.769	0
BTS1	164.722	181.996	132.028	111.199	87.8241	93.1988	103.516	139.096	132.262	109.182	105.89	80.2115	0
BTT1	186.737	281.269	108.276	125.328	94.6171	126.633	155.868	190.962	168.613	143.076	135.418	91.2475	0
BUB1	63.7445	56.221	98.8253	72.4813	82.3964	88.5333	82.6408	68.7663	56.5963	51.144	74.2858	76.6951	5
BUB2	530.726	368.923	276.803	302.758	184.437	227.333	255.605	389.529	243.851	242.413	224.391	267.95	1
BUB3	260.369	323.753	213.658	240.24	280.891	208.207	262.882	260.872	266.808	215.745	239.34	234.565	0
BUD13	132.402	168.425	181.029	179.294	138.564	123.113	137.097	110.061	128.399	121.817	115.614	184.753	0
BUD14	408.279	261.062	526.212	692.968	723.233	506.178	544.427	764.229	518.947	546.067	671.868	582.35	0
BUD16	86.6059	114.601	66.0833	110.398	123.717	148.542	144.481	121.025	115.328	232.377	158.231	119.622	0
BUD17	260.083	364.231	190.148	307.866	248.021	348.881	367.931	485.846	378.022	265.47	405.797	349.215	0
BUD19	161.429	100.266	821.352	138.968	138.154	49.8359	77.2884	140.701	94.2288	115.278	69.4578	135.257	0
BUD2	19.8008	26.7106	61.1828	43.7841	50.3425	53.3657	62.5493	56.5768	39.7357	46.5344	51.7781	59.2033	0
BUD20	700.884	426.86	592.49	552.072	387.879	763.37	849.262	1121.39	986.216	1054.61	1137.03	1426.9	0
BUD21	1005.8	1119.11	1045.51	696.688	556.053	893.971	807.81	1035.8	1190.49	502.505	885.23	1379.65	0
BUD22	237.301	184.306	359.558	318.505	275.519	277.634	302.768	304.089	356.863	204.248	440.547	674.698	0
BUD23	827.789	313.869	143.118	410.539	443.215	548.531	620.538	542.588	654.999	276.942	553.079	446.078	0
BUD25	65.3975	95.2584	69.1669	45.461	31.5331	39.7329	50.1352	81.5005	55.667	54.1299	36.8952	44.4683	2
BUD26	8.5736	5.8778	9.8538	10.2096	5.7275	9.8198	6.5442	5.9804	12.4573	10.2081	10.5948	12.6263	11
BUD27	701.478	582.64	299.818	352.502	249.922	362.51	423.699	563.533	413.875	333.602	463.31	551.216	0
BUD28	66.635	120.672	330.523	83.7284	54.6828	50.8363	55.496	127.695	103.271	59.8944	62.9803	88.8387	0
BUD3	47.5959	54.752	20.7742	34.2842	53.6123	62.2877	67.5317	74.4218	31.8504	49.8777	72.3007	60.9718	0
BUD30	112.263	109.434	87.3705	92.5065	73.3425	84.4712	82.4416	131.92	102.198	131.899	120.324	102.464	12
BUD31	158.435	232.298	120.42	168.226	118.848	189.827	208.925	293.687	274.404	171.462	219.696	211.435	0
BUD32	118.168	108.179	77.5247	105.329	84.1118	108.143	97.2673	95.4837	122.46	144.101	134.57	93.7659	0
BUD4	738.553	136.17	329.612	324.386	308.155	260.639	231.741	323.526	245.638	503.566	463.589	553.803	0
BUD5	88.7587	85.5188	107.379	80.6068	88.9906	54.3138	50.0773	62.7889	50.0361	69.7723	75.9899	63.3529	0
BUD6	294.593	330.356	265.635	354.012	285.3	374.189	355.178	442.653	268.143	322.628	380.276	145.762	0
BUD7	227.855	359.973	330.845	372.709	309.647	379.405	382.672	428.013	350.269	578.369	531.426	457.295	0
BUD8	120.898	138.297	195.491	210.969	198.108	200.811	187.46	213.366	155.094	202.277	229.975	236.712	0
BUD9	61.3839	53.1634	106.648	103.636	91.453	87.3096	71.1693	62.9759	95.6192	128.939	170.227	181.653	0
BUL1	105.125	160.408	191.45	153.321	163.376	181.613	200.96	215.495	166.211	197.799	204.171	227.998	0
BUL2	99.384	63.4624	93.9863	113.099	96.028	118.762	130.393	118.171	78.6798	71.4982	71.0641	88.7818	0
BUR2	100.537	142.361	131.753	152.444	140.546	177.614	219.85	250.59	197.491	157.583	169.779	126.7	0
BUR6	1677	1378.83	746.966	842.67	789.834	694.28	789.956	877.516	839.57	423.7	489.446	776.401	0
BYE1	133.08	124.673	135.734	223.131	255.739	242.917	268.566	260.779	194.127	148.854	177.056	132.977	0
BZZ1	346.264	332.166	186.279	265.876	271.899	242.571	263.013	206.557	224.452	257.372	237.099	198.495	0
CAC2	358.195	673.886	393.854	563.549	484.146	526.234	547.395	670.382	553.433	562.122	664.454	603.023	0
CAD1	470.803	603.887	468.585	528.198	420.839	370.358	369.418	435.946	330.22	402.367	405.732	490.815	0
CAF120	185.427	286.353	243.699	394.899	285.174	218.948	274.134	386.745	279.104	330.749	429.577	626.391	2
CAF130	384.885	402.931	298.372	442.729	351.349	301.966	274.801	343.383	270.951	262.549	270.836	302.282	0
CAF16	1273.62	987.143	904.477	959.81	790.176	996.754	979.637	1031.67	1044.08	812.969	677.357	496.41	0
CAF17	243.82	170.218	251.441	215.307	248.822	349.985	387.876	400.689	478.357	258.127	362.846	332.097	0
CAF20	3083.06	2458.94	3084.12	2502.55	1865.4	3129.18	4042.48	4066.49	4265.77	3645.5	3661.58	3924.49	0
CAF4	332.681	225.049	290.038	322.469	252.219	235.276	266.585	262.225	278.326	278.441	309.892	256.444	0
CAF40	335.445	516.72	397.544	486.986	437.083	362.911	401.653	414.651	453.591	487.353	498.511	518.018	0
CAJ1	999.207	1335.83	1548.69	1485.79	1521.3	1149.72	1254.96	1045.36	1369.5	1419.82	1160.09	1142.72	0
CAK1	498.435	561.099	322.555	772.797	586.055	462.462	494.548	489.818	597.487	526.036	548.848	446.536	0
CAM1	1782.14	2646.05	1191.18	1735.69	1613.65	1174.71	1386.69	1482.63	1472.17	1323.24	1248.07	1282.71	0
CAN1	212.146	268.826	194.244	365.677	403.18	332.195	353.909	313.776	277.489	378.242	400.551	383.233	0
CAP1	762.878	783.78	778.083	1041.61	1122.64	1263.9	1197.71	1294.67	909.279	988.735	914.902	586.541	0
CAP2	750.219	821.443	918.663	845.411	1012.43	901.618	772.057	828.868	687.286	813.171	958.998	1037.87	0
CAR1	791.508	714.06	492.139	846.553	582.788	483.044	540.426	679.793	443.151	863.471	491.258	542.956	0
CAR2	2477.54	3574.36	851.491	1761.07	1665.53	1292.4	1546.45	1944.24	885.74	534.683	345.66	376.907	0
CAT2	3097.78	3678.32	2583.75	2839.59	2582.89	1914.64	2174.59	2307.85	2576.81	487.208	212.271	186.731	0
CAT5	610.552	693.782	598.388	601.839	537.074	483.453	560.731	187.095	713.505	603.326	598.315	437.177	0
CAT8	134.235	190.548	168.763	220.249	265.058	157.389	141.839	184.997	89.3413	189.54	156.626	198.549	0
CAX4	28.2602	39.7136	14.3396	13.8197	20.6294	20.3326	18.5628	22.9807	28.3804	23.3051	23.5395	14.1358	1
CBC2	2627.33	1845.12	1858.44	1580.61	1166.98	1774.21	2415.1	1859.21	2458.57	1809.5	1708.65	1714.11	0
CBF1	146.187	155.252	128.277	164.474	162.474	189.203	200.728	284.459	137.975	190.795	184.425	106.403	0
CBF2	178.881	139.923	153.739	122.582	112.055	137.858	147.942	135.939	150.21	131.421	151.249	159.087	0
CBF5	1903.73	1568.05	1896.6	1777.04	1865.33	2216.68	2378.41	2507.63	2298.08	2184.61	2737.51	2576.77	0
CBK1	1007.75	1064.24	563.929	648.455	645.839	605.119	660.996	776.784	518.85	566.953	648.083	502.734	0
CBP1	88.4315	66.8056	538.387	272.77	226.114	162.364	178.516	206.678	290.393	585.662	673.814	826.244	8
CBP2	89.4476	74.5958	112.768	75.1551	124.457	131.343	101.214	84.9621	105.627	97.7174	94.9718	71.1403	0
CBP3	432.62	405.554	489.943	455.344	491.968	857.523	881.546	726.468	978.929	818.071	858.234	779.536	0
CBP4	2611.73	2192	1042.96	1014.2	1078.99	1306.99	1200.47	1473.8	1602.06	1492.22	1141.76	965.965	0
CBP6	840.332	687.777	830.297	740.924	646.249	879.003	919.97	783.198	1359.81	1408.21	1197.11	1166.64	0
CBR1	5325.61	5829.8	3812	4719.39	4469.63	4559.64	4834.74	4472.4	4974.81	4801.45	5263.86	3876.36	0
CBS1	166.681	183.518	214.301	142.845	96.8307	176.655	190.064	158.07	212.052	163.815	184.838	205.436	0
CBS2	202.915	119.483	143.466	131.84	137.832	188.876	204.01	189.471	228.254	186.725	180.862	158.171	0
CBT1	283.181	314.278	411.824	451.139	452.598	609.857	610.314	842.535	640.363	564.808	588.723	453.011	0
CCA1	199.604	244.874	209.876	233.231	188.173	257.667	252.324	279.513	263.994	188.075	205.047	212.607	0
CCC1	379.696	437.286	504.032	478.173	456.619	446.48	484.687	441.898	349.92	333.711	297.468	202.476	0
CCC2	607.337	546.041	875.004	839.22	430.544	310.103	285.259	380.451	573.899	1092.33	1270.14	1325.08	0
CCE1	56.3757	59.6055	103.741	107.843	104.845	85.5897	102.154	78.6768	69.8666	68.1642	78.371	44.1176	0
CCH1	164.188	106.188	169.891	113.969	129.684	117.747	124.994	102.012	84.0774	131.811	178.512	190.019	0
CCL1	206.504	207.349	206.409	187.302	199.928	202.832	203.746	193.218	203.121	215.501	203.343	208.925	0
CCP1	196.972	368.484	358.668	412.706	631.381	555.143	591.528	681.642	446.06	319.296	334.104	256.04	0
CCR4	486.014	399.568	193.427	435.914	586.12	427.682	512.672	687.513	521.054	521.555	721.58	500.354	0
CCT2	3314.8	2246.12	1557.59	2192.53	1971.75	2269.82	2304.32	2004.71	2266.28	1631.43	2142.85	1894.79	0
CCT3	1690.92	1220.19	947.605	1111.83	1272.29	1539.03	1701.18	1828.03	1298.38	1350.05	1746.47	836.271	0
CCT4	1978.54	2049.01	1655.01	1896.7	1850.59	1875.81	1962.64	2271.58	2059.57	2297.53	2212.09	1782.36	0
CCT5	2294.3	2244.19	2284.93	2483.04	2378.07	2829.33	2897.32	3310.76	2563.87	2724.12	2749.5	2071.42	0
CCT6	2546.53	2893.95	1381.37	2941.42	2648.08	2183.7	2461.97	2978.84	2085.45	1697.93	2148.58	1724.76	0
CCT7	333.948	334.149	693.338	584.12	573.365	630.885	568.063	673.085	564.853	573.827	645.623	461.637	0
CCT8	954.573	839.347	1305.81	1080.62	1312.94	1215.73	1389.71	1425.57	1115.39	1181.01	1269.23	979.114	0
CCW12	22138.8	21510.5	21672.4	19450.3	23381.1	23665.5	23389	24140.5	22601.4	21920.6	21821	21994.2	0
CCZ1	200.137	268.486	365.385	272.693	176.007	183.721	253.113	259.306	192.566	189.78	211.481	313.079	0
CDA1	354.08	291.63	225.022	146.801	123.853	209.336	209.379	252.385	269.44	34.7768	30.1191	35.0402	3
CDA2	75.8129	42.6721	34.6127	31.8584	26.9614	31.558	31.3484	38.8741	55.1096	38.4186	37.1437	30.4262	12
CDC1	658.947	728.422	502.207	691.033	683.362	537.247	564.295	575.555	528.888	843.201	698.163	674.507	0
CDC10	1923.47	1659.3	1965.79	1713.88	1334.58	1311.04	1534.51	1605	1621.86	1934.03	1565.1	1826.6	0
CDC11	671.288	381.836	1025.76	907.778	1017.83	783.395	599.782	975.282	704.17	784.975	849.064	800.423	0
CDC12	161.114	172.899	229.694	221.212	224.233	228.315	189.883	173.169	225.582	234.797	272.241	267.799	0
CDC13	197.17	267.647	106.51	170.836	149.02	130.029	121.403	215.249	136.869	161.13	193.908	156.43	0
CDC14	672.46	747.149	594.537	826.826	605.438	684.008	651.782	804.894	896.584	970.71	997.554	1269.91	0
CDC15	72.0886	50.9651	160.707	129.4	134.938	100.084	111.826	130.622	82.6771	191.168	157.974	208.472	0
CDC16	191.197	207.655	475.443	291.091	250.891	304.09	281.297	441.704	209.67	312.128	210.026	393.09	0
CDC19	7865.78	8496.08	9067.5	9491.5	10315	8147.53	8718.87	9633.25	5039.71	7555.63	7703.72	9256.48	0
CDC2	6.5834	20.9293	19.8809	19.4334	23.8948	21.486	25.9252	21.4649	18.2837	18.1746	17.8715	12.2671	1
CDC20	214.253	166.054	198.155	231.77	234.555	177.634	176.741	158.729	147.663	199.075	248.257	216.664	0
CDC21	3.6159	10.4137	5.8862	4.4746	14.5889	23.8622	35.854	12.8877	15.1816	19.6623	42.9095	25.7642	3
CDC23	179.287	190.427	221.043	259.286	155.028	148.222	121.238	156.505	144.771	164.415	121.328	155.583	0
CDC24	256.562	268.21	517.337	362.52	387.497	397.061	301.614	497.132	193.925	342.809	362.271	366.741	0
CDC25	118.231	127.167	99.9647	114.123	166.027	125.083	128.601	111.79	65.3559	123.102	126.452	51.773	2
CDC26	1283.17	1209.72	580.956	569.686	530.199	452.75	514.656	735.29	546.157	379.785	555.23	729.724	0
CDC27	549.668	683.944	585.833	720.793	617.661	504.176	455.658	646.263	483.78	577.391	472.635	404.292	0
CDC28	1084.14	1358.31	824.02	967.263	989.811	1044.35	1130.5	1090.22	1186.02	1044.27	937.262	680.816	0
CDC3	50.0971	70.6478	139.769	78.114	146.067	173.576	139.48	117.657	90.4233	151.153	123.793	101.184	0
CDC31	647.404	452.633	545.394	487.58	356.599	428.789	516.628	267.681	483.964	397.257	349.23	357.591	0
CDC33	6332.34	4940.57	5626.05	4783.81	4268.11	5315.86	5925.23	5259.36	5844.69	5208.7	5903.6	5036.4	0
CDC34	224.995	216.531	220.148	191.754	150.459	132.218	157.522	149.441	204.277	147.334	137.003	160.185	0
CDC36	1164.99	899.858	705.739	712.246	447.163	665.812	905.537	795.652	788.535	685.566	773.169	754.979	0
CDC37	1892.31	1757.6	2425.35	1707.62	1685.7	1124.15	1360.52	1259.39	1491.59	1488.03	1164.99	1461.76	0
CDC39	228.513	150.535	173.819	121.144	133.922	132.728	169.784	177.482	165.158	210.14	213.11	282.292	0
CDC4	294.288	313.392	331.455	364.49	221.781	247.628	181.521	267.162	274.82	334.44	275.22	348.639	0
CDC40	349.778	295.345	177.421	221.618	240.627	283.363	292.633	321.532	266.102	183.319	254.983	152.172	0
CDC42	962.366	1335.58	3705.27	2745.16	2475.27	2903.19	2859.96	2948.19	3545.78	2414.96	2871.5	3038.16	0
CDC43	200.953	223.255	132.098	191.263	186.486	203.387	232.031	242.607	198.689	232.336	268.648	142.429	0
CDC45	300.005	188.502	329.776	340.029	259.316	366.059	455.027	402.748	467.945	433.2	511.401	453.384	0
CDC46	667.323	483.066	390.598	347.325	361.895	366.564	436.464	425.352	333.275	262.358	270.628	170.75	0
CDC47	422.767	311.855	320.263	239.928	228.615	290.206	285.411	295.276	321.078	230.776	327.178	417.199	0
CDC48	4176.86	4641.61	5452.23	4675.76	5232.78	4317.3	3930.46	3844.36	3822.17	3905.51	3593.26	4100.91	0
CDC5	149.503	139.818	409.278	367.902	317.572	347.759	333.118	340.583	320.642	298.573	312.779	341.843	0
CDC50	247.204	241.268	204.026	233.527	242.077	238.31	319.611	297.644	239.64	279.132	352.834	366.166	0
CDC53	655.966	764.315	486.807	526.024	738.821	552.602	582.529	532.213	348.027	540.151	532.529	345.865	0
CDC54	303.632	409.847	352.478	346.697	313.038	308.79	367.936	361.274	306.237	275.567	253.789	260.598	0
CDC55	152.338	130.662	125.068	140.341	152.854	116.595	133.724	102.256	110.135	142.055	143.313	150.939	0
CDC6	76.2096	75.1411	98.5727	82.2838	88.4375	99.3303	109.167	112.697	122.628	46.1402	135.808	161.614	2
CDC60	1042.33	1014.99	975.222	1055.01	1336.73	1379.57	1623.36	1239.94	1527.01	1870.61	2362.24	1886.28	0
CDC7	301.775	326.214	210.204	277.547	247.781	264.181	295.504	250.462	262.479	322.921	259.619	212.795	0
CDC73	224.116	353.268	405.827	480.148	463.337	582.367	595.911	592.088	506.206	438.136	473.405	396.281	0
CDC8	269.762	236.547	371.254	348.851	293.376	394.928	438.351	471.139	312.959	554.161	439.531	264.083	0
CDC9	481.073	408.196	262.136	279.541	168.628	339.387	396.322	535.886	445.982	468.006	447.94	567.262	0
CDC91	858.031	650.874	670.85	749.991	738.566	827.866	914.123	995.419	837.499	925.867	1005.15	878.596	0
CDD1	131.023	132.564	160.819	163.86	153.105	186.197	207.066	247.54	197.144	163.349	200.365	185.558	0
CDH1	228.032	239.317	177.95	271.128	233.993	189.477	200.415	174.065	155.342	190.343	178.337	165.104	0
CDS1	634.542	966.576	907.172	955.461	1035.68	1201.48	1339.15	1130.74	1391.5	1004.01	1126.65	1031.16	0
CEF1	287.11	341.615	250.77	307.094	196.852	205.973	233.99	337.898	205.623	228.179	242.743	349.172	0
CEG1	1097.73	1113.05	739.135	861.879	786.313	668.151	576.128	796.857	749.067	666.024	578.013	567.985	0
CEM1	152.564	148.378	128.671	195.217	155.236	164.134	199.433	128.321	193.465	171.336	164.83	128.485	0
CEP3	74.169	71.6641	71.608	69.1615	69.6767	70.3338	90.7939	70.6459	69.117	87.6346	78.2066	64.6194	0
CET1	58.12	53.3051	69.0599	53.1853	74.6219	65.8735	71.7465	39.413	59.174	57.2199	63.8769	54.3765	0
CFD1	844.886	553.469	681.819	673.505	575.867	606.805	466.719	405.454	481.862	301.356	442.17	386.322	0
CFT1	134.838	149.245	153.062	167.158	138.963	149.514	176.295	215.358	152.758	244.521	228.196	195.444	0
CFT2	77.4216	100.764	116.634	107.421	123.93	113.804	135.934	117.788	93.4833	137.074	160.469	114.718	0
CGR1	570.433	502.334	1214.39	591.685	381.483	478.907	511.902	437.958	943.917	234.547	617.733	1095.79	0
CHA1	46.2036	54.2441	93.2722	127.607	108.174	72.8159	80.4079	65.3773	64.1142	62.1927	58.1156	70.4496	1
CHA4	32.496	37.4629	70.5794	83.311	100.654	52.0331	32.3951	23.6983	39.2307	67.4252	61.21	55.1999	0
CHC1	768.492	900.347	798.089	1203.71	1148.18	817.368	964.545	641.67	834.702	861.451	917.589	816.463	0
CHD1	97.0898	153.924	109.188	161.416	146.771	116.317	122.115	97.5374	108.173	123.477	166.156	303.444	0
CHK1	455.482	563.833	546.023	384.569	566.466	465.166	512.773	505.883	434.601	308.235	319.772	234.931	0
CHL1	1000.12	641.598	347.253	448.139	349.199	450.842	442.793	694.703	575.032	477.577	450.601	383.408	0
CHL4	93.1918	136.462	130.323	63.7893	88.7229	59.8058	65.5437	63.2719	71.0169	72.5542	52.308	70.7244	0
CHO1	3116.29	2735.95	3018.41	3696.85	3360.46	3420.27	3529.28	3393.37	4172.42	3494	3689.59	2729.42	0
CHO2	1179.13	1078.86	2069.24	2326.43	1841.07	1669.07	1852.03	769.05	1902.47	1879.16	1721.58	1762.76	0
CHS1	461.797	324.798	535.056	551.041	684.959	517.184	462.619	338.222	327.085	541.988	342.045	317.988	0
CHS2	258.357	223.971	494.094	482.633	396.888	464.803	499.555	457.992	515.269	595.073	428.895	509.668	1
CHS3	908.206	1130.67	842.395	929.904	1181.84	869.684	982.658	639.845	643.338	945.899	754.281	503.137	0
CHS5	1176.39	806.924	997.986	1074.7	1083.26	737.889	876.663	954.595	820.279	1035.21	862.467	956.282	0
CHS6	227.41	255.046	207.971	296.603	284.986	286.535	337.047	416.558	249.679	222.993	256.618	183.455	0
CHS7	783.874	937.466	542.07	676.327	650.513	630.235	592.341	539.228	695.255	649.959	666.086	431.337	0
CIC1	379.821	162.182	267.035	213.892	148.856	333.073	348.493	189.523	461.206	209.436	383.51	404.841	0
CIK1	251.045	250.509	246.814	257.105	223.712	224.006	255.597	338.228	225.781	251.977	289.376	224.455	0
CIN1	20.1755	22.7429	59.3367	47.5541	42.1765	29.3936	34.0183	29.3001	32.1093	35.598	39.9962	36.0254	4
CIN2	152.639	194.286	233.525	195.653	148.739	280.162	294.274	374.184	341.465	256.051	269.991	234.25	0
CIN4	669.085	619.763	530.59	559.497	336.095	432.346	510.016	353.143	570.885	523.519	622.364	588.199	0
CIN5	1008.68	472.21	113.171	131	144.131	89.9085	92.3131	98.9875	93.9933	226.418	154.601	91.4664	0
CIN8	153.859	92.6416	156.143	111.813	107.247	145.265	152.581	163.803	165.885	171.877	209.157	218.086	1
CIS1	364.139	323.521	307.728	302.637	192.158	164.231	197.002	218.992	218.653	226.549	174.07	190.171	0
CIS3	1645.48	663.657	2914.14	3760.66	4803.24	3500.74	1620.12	3566.98	3313.33	4226.36	5058.69	4776.25	0
CIT1	6534.19	6457.97	7259.73	7491.71	8227.52	7328.23	7701.41	6430.93	6836.16	7189.47	7248.27	5863.89	0
CIT2	3444.17	3074.28	2759.31	3283.32	3003.27	2894.14	3287.57	3080.2	3577.52	3913.84	3287.74	3329.46	0
CIT3	441.606	685.552	596	587.335	764.301	573.673	426.147	462.395	721.708	67.6093	55.1611	87.4114	1
CKA1	695.134	412.775	875.113	590.661	656.982	614.905	505.494	242.342	519.203	444.052	561.392	531.247	0
CKA2	874.719	1350.48	765.914	969.777	1105	997.843	1178.16	813.019	1009.14	947.943	1083.87	670.995	0
CKB1	1957.28	1073.39	679.216	962.941	913.433	1362.04	1331.91	1465.79	1528.75	1022.81	981.594	655.945	0
CKB2	1186.94	1046.61	913.87	918.044	855.999	1093.1	1189.74	1363.61	1197.72	1131.16	1009.24	693.918	0
CKI1	276.455	185.519	266.135	301.345	425.195	348.798	366.713	314.671	322.263	569.869	557.923	619.448	0
CKS1	600.756	651.272	698.159	350.565	709.167	192.756	277.985	529.223	596.128	339.415	386.628	279.945	0
CLA4	291.617	294.009	248.25	267.849	241.16	302.934	327.337	295.217	244.333	357.682	393.813	491.327	0
CLB1	128.866	104.903	261.734	379.142	338.728	207.917	177.001	158.319	225.935	125.134	160.089	149.1	0
CLB2	30.9972	32.0554	53.1646	52.5267	54.3713	51.8201	54.4549	43.7446	60.8044	65.9075	75.4115	61.1444	3
CLB3	303.656	328.394	649.671	521.105	708.164	608.496	477.876	482.54	607.963	531.186	602.028	699.767	0
CLB4	328.817	273.304	288.949	211.741	206.298	242.193	326.699	337.309	298.473	213.563	286.761	258.579	0
CLB5	610.381	509.993	452.722	399.882	362.469	535.941	541.753	607.22	645.746	543.978	620.465	638.96	0
CLB6	48.3478	37.2043	59.6453	45.3947	39.4016	81.7493	89.9399	109.023	149.542	83.5859	162.116	175.474	1
CLC1	1186.15	1383.18	1427.97	1651.98	1777.42	1278.67	1260.35	1284.2	1333.25	2291.99	1767.57	1876.75	0
CLF1	47.1793	67.4209	63.008	57.0035	80.5928	61.1147	76.2179	62.2174	49.9756	38.8034	50.2781	41.3726	0
CLG1	199.254	193.754	216.226	139.685	130.577	130.04	217.764	203.843	171.251	90.0379	111.353	267.545	0
CLN1	347.253	383.914	470.448	425.151	422.877	465.643	575.663	537.491	490.624	325.36	521.593	615.69	0
CLN2	347.694	308.315	178.38	248.97	293.14	408.904	532.741	388.602	481.739	367.319	721.925	797.888	0
CLN3	133.976	107.74	134.491	146.251	137.249	155.632	136.934	233.456	151.834	220.628	250.311	294.068	0
CLP1	54.4173	90.2994	101.025	117.081	119.538	134.68	142.072	144.179	104.088	117.592	132.204	136.119	0
CLU1	1327.23	1338.63	2215.92	2335.8	2684.85	2256.93	3006.87	2449.45	3160.91	3236.61	3587.49	2711.86	0
CMD1	3308.35	3649.14	3965.12	3720.61	3045.77	3234.22	3953.77	3437.07	3437.47	3155.46	2967.12	3178.79	0
CMK1	44.8143	75.1704	67.6258	68.142	95.2543	121.144	96.9172	58.9728	120.589	153.992	153.582	105.522	0
CMK2	269.145	277.428	397.584	348.893	341.375	257.864	240.691	260.558	147.016	636.528	334.086	293.986	0
CMP2	95.6443	184.895	266.199	293.387	278.969	186.102	176.077	215.886	142.587	209.135	190.325	264.695	0
CNA1	58.6374	48.5394	42.031	61.1048	62.7191	40.3864	53.0148	51.0609	34.4093	57.9395	68.8369	52.8599	0
CNB1	3248.61	2848.88	3641.84	4681.06	4198.46	4209.81	4416.42	5361.02	3451.89	4928.9	4863.98	4755.15	0
CNE1	114.877	62.3694	183.607	212.177	218.569	175.881	157.748	207.279	174.147	193.067	258.296	212.369	1
CNM67	174.776	146.808	254.703	160.519	171.502	216.412	212.102	206.564	182.712	155.468	129.32	167.164	0
CNS1	321.639	325.36	395.982	393.692	299.518	380.196	385.904	414.412	407.519	388.767	571.542	862.916	0
COF1	6173.41	6302.61	7203.21	6700.65	6727.62	7379.92	7837.07	8322.12	7284.61	6941.89	6681.28	6141.77	0
COG1	304.257	230.617	165.914	172.56	167.81	182.031	199.956	197.373	194.812	146.483	170.337	137.21	0
COG2	181.565	236.118	196.88	191.55	205.496	202.828	230.554	164.998	168.316	168.685	211.591	173.669	0
COG3	92.1659	92.16	114.964	121.685	102.128	90.3388	120.682	79.4882	99.9738	108.285	85.4198	84.2444	0
COG4	182.635	296.47	274.072	225.218	251.908	243.923	238.73	179.076	203.095	282.101	213.648	189.193	0
COG5	360.639	452.988	314.247	280.666	346.21	315.205	359.367	366.808	330.507	389.932	286.694	220.263	0
COG6	86.1621	160.517	276.189	193.2	240.191	152.507	156.309	129.706	123.668	179.996	165.273	184.277	0
COG7	292.006	175.488	171.183	135.669	96.1979	170.693	177.371	117.532	186.076	125.367	99.2425	91.4851	1
COG8	650.905	510.038	719.563	872.51	771.353	523.879	677.594	684.905	610.93	601.363	726.088	809.73	0
COP1	865.162	1027.74	804.046	992.36	1182.24	939.356	1080.71	1132.12	1104.08	1163.88	1185.3	1141.38	0
COQ1	116.094	272.655	148.469	246.489	297.595	263.46	289.767	355.909	335.668	438.302	320.645	292.251	0
COQ2	876.74	761.688	617.205	911.687	882.456	1054.33	1176.59	1238.86	1197.38	1131.03	1389.56	1000.44	0
COQ3	518.338	530.995	598.715	679.81	525.67	494.663	555.114	516.785	539.024	717.406	481.496	528.575	0
COQ4	782.624	909.784	576.96	825.237	1291.97	848.698	728.125	883.338	611.944	656.46	611.85	322.073	0
COQ5	1780.7	1518.94	1841.35	1908.74	2552.18	2065.34	2267.52	2194.64	2038.61	2646.74	2360.02	1832.81	0
COQ6	437.483	416.882	423.358	636.188	555.426	408.801	439.364	226.661	414.076	601.393	525.245	487.519	0
COR1	2969.5	2913.07	3402.81	4196.83	4180.15	3848.9	4374.02	3582.5	3726.59	4143.11	4055.62	3524.07	0
COS1	4571.63	3782.65	3390.74	3916.98	2912.05	2547.37	2646.48	1992.42	2719.45	3324.57	2191.85	2316.98	0
COS10	64.3783	38.5191	46.3477	44.3669	33.359	61.6371	46.5725	39.1167	59.0125	59.4212	67.3842	82.3388	4
COS111	12.1366	12.1412	8.5444	4.1334	13.5672	7.9684	7.1263	6.9907	7.5368	9.7427	4.4117	4.0859	2
COS12	62.0827	66.5306	55.3874	70.5048	43.6975	129.668	123.309	113.745	256.909	155.784	139.829	105.991	2
COS2	640.796	1066.39	712.985	1164.88	958.529	793.819	841.846	285.063	803.106	1270.68	714.378	878.953	0
COS3	953.475	871.09	1135.98	999.844	713.563	853.75	942.74	555.792	959.921	1055.59	629.787	910.417	0
COS4	2776.6	2504.08	2696.58	2961.68	2399.09	1902.03	1971.78	998.329	1989.67	2724.3	1697.61	1924.9	0
COS5	3400.14	2713.37	1710.01	1784.66	1734.39	1259.79	1514	1378.18	1341.42	1533.12	1068.64	1033.32	0
COS6	2513.37	880.102	1379.85	1591.44	1550.18	1055.2	1377.1	497.4	798.239	1326.23	1241.41	891.197	0
COS7	47.7266	54.0477	44.2472	40.0426	91.4554	64.3067	78.8882	13.6614	37.0078	81.9482	41.0116	25.5574	0
COS8	79.635	58.6681	67.4814	63.8932	42.9867	59.682	48.4076	44.5892	98.094	90.3533	72.6199	67.7213	4
COS9	139.997	164.838	202.072	219.203	223.722	225.676	246.759	259.206	151.54	193.48	173.524	91.7848	0
COT1	936.76	1170.16	1797.92	1812.14	1941.62	1338.33	1410.89	1513.89	1875.31	2037.98	2087.74	1627.27	0
COX10	465.295	511.918	476.477	658.906	641.14	803.05	776.608	861.465	1006.45	1001.88	1163.64	827.291	0
COX11	379.478	697.539	736.833	655.567	794.636	1020.11	914.078	531.009	1110.07	1874.24	1551.92	1278.75	0
COX12	9986.26	7557.58	9610.81	8814.64	9090.83	9828	10497.7	9736.44	10495.8	9637.91	9545.55	8723.01	0
COX13	7670.06	6235.21	6701.07	6209.76	6237.2	5392.1	5585.98	5369.12	6421.13	5335.64	5928.52	5593.71	0
COX14	2004.73	1697.32	1907.22	2001.42	1726.7	2513.23	2887.39	2776.86	2454.72	2420.37	2825.55	2105.97	0
COX15	1447.6	1577.24	1053.56	1734	1991.63	1654.13	1804.18	1235.72	1622.32	1367.55	1177.04	784.53	0
COX16	289.562	384.093	870.989	660.112	666.615	568.667	618.083	653.064	529.382	552.747	556.239	896.578	0
COX17	1475.73	726.288	1542.67	1350.23	1179.97	1891.19	1783.8	1791.06	2128.81	2750.24	3060.64	3249.58	0
COX18	1316.87	1259.43	762.103	1080.13	683.077	891.083	905.026	1049.3	1293.86	1431.24	1251.47	1316.76	0
COX19	261.06	252.197	54.1497	130.178	133.175	191.825	269.498	327.851	208.941	238.484	254.123	148.018	0
COX20	3043.15	4020.81	1321.11	1730.16	1678.13	1431.5	1496.09	1744.4	1566.46	1545.08	1358.59	1002.77	0
COX4	4043.44	3295.38	3720.01	2915.05	2995.14	3777.53	3856.01	2791.1	4000.33	2914.53	3005	2517.03	0
COX5A	4808.56	4174.48	3855.11	3840.87	4405.14	5536.82	5809.62	5686.79	5326.99	3912.06	4952.47	4145.38	0
COX5B	96.9424	58.0849	48.7032	53.1914	47.3647	43.6522	47.7776	39.1801	30.7867	112.825	45.6196	30.9159	0
COX6	6075.43	4542.39	4701.94	4184.19	4333.79	5286.71	5694.49	4958.75	5846.56	4956.47	4598.97	3925.73	0
COX7	8786.43	7001.68	8101.6	7200.99	6941	7030.78	8898.03	6550.5	8396.26	8302.43	8813.49	7974.55	0
COX8	6352.73	4841.2	5904.31	5699.7	7031.2	6496.21	6229.45	6679.69	6061.68	7275.52	6530.19	6221.92	0
COX9	5736.43	5800	5484.94	5316.99	5428.88	6282.23	5979.38	6239.44	6570	5959.06	6099.32	4947.47	0
COY1	297.94	353.288	371.205	362.506	446.532	418.324	370.85	444.952	323.363	445.238	422.082	365.971	0
CPA1	8840.19	6794.93	4648.81	6089.96	6182.43	4608.52	5412.66	5239.72	4908.29	2809.52	3696.25	3397.03	0
CPA2	1825.95	818.543	2554.19	2459.82	2524.7	1551.45	1393.1	1626.14	888.078	1110.97	981.843	1001.79	0
CPD1	299.069	112.494	78.6922	181.362	132.876	163.626	193.067	118.937	152.53	94.8441	129.828	46.7786	1
CPR1	9303.24	10661.1	8171.48	8624.68	8697.76	6242.75	6561.69	6634.02	6205.29	6385.79	5777.99	4600.67	0
CPR2	6539.84	4969.68	3771	4259.64	3334.11	3278.74	3172.02	3110.88	3499.04	2521.55	2291.25	2335.85	0
CPR3	2247.98	2592	2613.33	2942.89	3473.65	4074.61	4570.13	4483.82	3672.23	3391.11	4287.75	4421.57	0
CPR4	1871.97	2009.69	1372.43	1738.51	1428.26	1079.33	1179.99	1265.54	943.534	828.813	752.217	916.468	0
CPR5	1079.53	1821.27	1485.48	1484.97	1402.95	1358.44	1123.29	1617.77	1406.89	1304.79	1174.58	963.064	0
CPR6	3707.11	3391.02	3439.97	3272.69	2973.88	2317.38	2589.33	2915.38	2071.15	1823.71	1631.73	1535.93	0
CPR7	251.348	194.078	271.173	204.832	167.429	162.123	168.309	207.642	220.374	267.985	279.867	308.085	0
CPR8	127.696	166.165	274.734	302.499	274.626	242.986	334.304	221.521	316.624	262.894	292.509	260.893	0
CPS1	63.8488	60.0434	120.335	127.332	137.407	104.214	160.566	146.112	84.7227	53.48	61.7591	64.7605	0
CPT1	2900.33	2316.3	2896.88	2776.07	2603.58	2854.17	2997.47	2763.71	2670.13	2985.85	3082.59	2775.83	0
CRC1	1416.36	1798.15	910.9	1024.25	996.634	1136.51	1105.69	1246.02	1546.1	1400.52	739.383	498.323	0
CRD1	869.019	1010.69	448	646.655	616.308	657.361	593.579	634.948	628.662	717.902	433.388	199.522	0
CRH1	2010.09	1561.62	2090.99	2509.9	1833.18	1514.92	1668.29	851.624	1974.71	1455.59	1374.12	1606.94	0
CRM1	97.6765	64.0255	67.8635	80.3965	115.284	87.6996	79.2428	56.9993	55.5718	86.6251	100.791	57.4878	0
CRN1	444.8	616.122	556.816	721.466	792.83	852.355	951.886	999.641	701.015	757.076	787.071	832.413	0
CRP1	2273.14	2006.22	2403.63	2247.43	1527.53	942.801	1149.82	1297.12	1153.46	921.723	1002.86	1573.34	0
CRR1	46.1615	31.7888	33.5831	40.8145	40.4141	39.0713	35.1425	36.1031	27.5777	28.7506	33.8265	30.4362	1
CRS5	7254.1	4203.48	2697.78	2448.11	1847.07	1226.98	1295.86	1749.92	803.801	1188.14	666.552	587.238	0
CRZ1	275.135	418.023	365.226	429.551	324.297	249.343	305.595	346.446	237.688	225.415	244.852	283.351	0
CSE1	624.031	558.14	763.136	650.332	546.178	583.846	681.204	459.142	620.461	771.744	678.706	922.477	0
CSE2	594.849	691.749	306.071	392.803	370.266	447.053	459.828	602.548	368.436	404.251	335.345	450.042	0
CSE4	459.407	336.307	505.651	356.394	194.377	249.828	375.107	293.64	366.203	249.479	259.483	229.404	0
CSF1	178.581	144.169	138.065	137.067	110.784	146.6	173.831	209.821	165.966	160.134	265.051	257.994	0
CSG2	844.423	1355.03	677.34	998.94	1131.06	896.988	897.394	971.916	672.225	806.567	555.758	476.198	0
CSH1	245.474	230.375	231.878	282.273	216.16	169.342	166.834	200.709	148.699	479.607	315.913	251.37	0
CSI1	347.427	281.482	214.116	178.715	132.317	165.508	173.243	212.309	182.975	159.808	130.403	97.469	0
CSL4	1724.11	1091.07	1342.29	1314.62	1201.73	1636.75	1784.22	1400.88	1819.61	1542.82	1820.02	1572.06	0
CSM1	451.127	503.154	414.294	466.589	363.981	319.439	377.215	414.062	472.341	393.095	483.197	563.097	0
CSM2	82.3762	62.2083	53.0514	49.8716	41.8728	47.4939	47.0967	47.5148	63.0945	52.8051	69.7649	76.2525	0
CSM3	134.57	77.5629	55.0646	72.3871	67.5213	80.7364	95.016	80.2361	94.2233	74.1008	85.687	65.5151	0
CSM4	46.1739	63.0979	64.2779	47.3153	57.8009	66.094	55.4742	57.5852	68.7355	31.2648	17.5507	16.9369	2
CSN12	175.413	104.846	166.057	201.435	172.198	172.047	207.559	201.955	184.575	222.196	214.918	173.529	0
CSN9	106.142	47.5187	109.231	48.5284	57.1539	61.6762	68.3199	30.9791	63.2648	41.9303	46.6188	77.5302	0
CSR1	510.715	620.078	371.899	531.741	484.228	545.503	642.381	731.525	509.813	419.736	523.385	783.161	0
CSR2	192.224	273.572	177.466	236.746	283.303	245.416	245.028	226.774	123.395	271.037	162.745	159.893	0
CST6	1024.5	1265.78	1010.32	996.426	980.887	712.992	782.541	668.64	521.339	681.785	462.744	605.525	0
CST9	233.502	261.756	389.786	530.355	352.822	331.093	380.546	357.048	398.299	483.723	453.513	921.833	0
CTA1	5475.39	7045.25	3394.09	3746.66	4103.05	2572.1	2666.56	2803.31	2338.01	140.268	74.2375	66.4186	0
CTF13	53.5744	95.5916	133.99	38.2423	36.8323	20.5283	34.7111	54.0582	20.2904	9.6804	11.2731	7.8773	2
CTF18	70.6836	78.6522	94.2412	82.2942	86.193	89.671	109.758	79.3825	105.974	118.693	148.249	180.926	0
CTF19	72.8668	149.256	43.0444	40.045	43.7181	53.8556	71.7943	98.08	70.5254	52.1427	65.7327	32.3566	3
CTF3	102.973	103.518	160.421	124.878	118.789	122.923	134.643	133.399	108.931	123.574	115.078	130.656	0
CTF4	1547.22	2078.88	1269.51	1085.93	1151.88	864.387	986.456	1080.05	907.021	976.503	773.51	850.515	0
CTF8	248.461	378.421	394.22	550.713	403.401	320.031	332.629	90.8512	438.969	448.906	312.465	320.958	0
CTH1	246.43	149.95	119.097	99.2769	110.858	97.5543	101.723	121.784	147.842	69.9389	143.869	159.472	0
CTI6	56.5918	71.8187	59.988	53.8243	80.6377	77.2034	68.7166	48.7682	55.1608	49.3905	53.1169	63.3966	0
CTK1	211.386	88.2704	259.112	248.616	285.052	192.318	224.224	139.843	205.83	225.971	308.018	293.247	0
CTK2	450.103	358.789	468.724	461.008	365.423	474.067	488.193	632.518	359.459	385.063	458.607	509.493	0
CTK3	245.16	132.425	124.418	174.175	145.65	152.79	166.234	187.242	166.196	147.591	204.63	205.189	0
CTL1	323.933	287.839	259.663	264.152	205.93	186.807	170.596	182.284	185.474	156.122	110.654	123.723	0
CTM1	113.547	83.9301	92.3194	135.329	114.766	144.472	146.231	112.584	154.178	117.92	177.969	165.95	0
CTP1	2190.12	1754.59	1737.9	1890.23	1772.06	2396.71	2732.43	2785.15	2626.48	2290.55	2801.95	2402.51	0
CTR1	404.414	269.578	674.907	648.613	715.195	1279.71	1336.95	1415.06	1425.87	451.668	888.397	727.703	0
CTR2	1839.66	1037.77	1071.56	1183.47	1215.68	1465.65	1123.87	1246.99	1928.32	2015.66	2230.86	1921.64	0
CTR3	2340.31	2573.93	3168.69	3312.67	3250.36	3681.88	3652.24	3987.28	3281.5	1306.38	2142.67	1468.8	0
CTR86	111.019	109.317	112.624	99.2619	87.7898	117.262	134.964	114.272	114.679	70.8496	87.4618	64.391	0
CTR9	44.4786	67.1054	128.74	106.924	116.723	92.9955	108.355	72.0757	100.807	85.4915	91.304	116.573	1
CTS1	1739.26	1017.41	3115.66	3806.53	3267.24	3151.62	3371.03	2975.8	3088.74	3793.51	4611.57	5539.45	0
CTS2	38.5025	29.0368	29.9684	28.2695	32.0825	38.4717	33.6502	31.4493	35.5726	32.6467	20.5882	25.2608	2
CTT1	734.473	578.753	429.952	426.221	549.576	166.642	201.252	156.951	39.8168	158.732	45.6935	52.7671	1
CUE1	506.668	917.337	711.542	700.896	880.145	739.33	792.891	943.836	602.127	710.312	548.489	504.97	0
CUE2	161.484	117.096	116.03	117.91	91.2934	119.653	127.918	134.535	135.837	93.2651	102.42	108.141	0
CUE3	95.9982	64.0261	116.002	56.1783	91.3619	100.742	62.5547	60.3239	80.768	80.9942	91.0908	90.226	0
CUE4	788.124	1698.66	1410.83	1661.33	1654.6	1772.27	1846.81	2306.14	1920.11	1623.69	1669.36	2012.47	0
CUE5	469.297	806.098	443.661	552.694	679.563	656.166	633.682	678.148	502.749	519.121	489.225	550.52	0
CUL3	116.474	90.0076	90.9947	111.216	105.571	109.195	98.3818	92.7496	114.774	76.5487	96.4375	85.0338	0
CUP1-1	19846.6	14366.9	12758.3	11825.7	10963.6	9554.41	9652	8468.61	10218.3	10087.5	10336.4	10312	0
CUP2	1680.01	2047.79	1086.73	1035.23	1405.77	1047.73	814.573	1130.91	804.3	758.856	592.407	352.591	0
CUP5	6155.11	5849.77	6357.61	6871.99	6269.1	5596.96	6917.87	5440.92	6891.41	6825.86	5573.5	4769.91	0
CUP9	3580.92	3493.49	2502.79	2742.52	2329.75	1952.91	2016.29	2588.59	1922.17	1481.19	1402.59	1676.28	0
CUS1	287.036	257.298	271.673	280.706	255.564	299.817	327.918	321.575	241.484	202.988	262.503	246.161	0
CUS2	169.395	275.274	191.447	227.99	197.612	186.749	183.252	200.144	179.834	185.495	161.089	165.633	0
CWC15	645.449	810.365	397.456	410.506	395.14	367.957	369.423	453.834	397.306	214.428	305.139	379.806	0
CWC2	798.576	789.971	474.922	414.441	315.871	367.987	377.44	591.763	450.682	229.982	465.944	550.822	0
CWC21	853.498	1054.34	648.696	816.54	448.979	550.605	614.885	837.248	648.213	554.354	479.595	518.429	0
CWC22	158.733	143.039	179.825	182.023	110.615	115.797	137.59	125.938	129.258	101.685	134.374	242.214	0
CWC23	504.272	575.889	239.452	289.759	262.023	247.498	269.678	355.591	273.645	221.624	227.937	252.548	0
CWC24	131.903	104.745	172.948	188.692	136.908	171.757	222.893	160.186	163.128	117.348	185.051	135.634	0
CWC25	47.609	116.54	57.6261	47.83	54.6928	41.7761	59.9648	54.8469	37.8345	29.771	44.3977	46.2455	0
CWC27	247.449	244.214	203.546	232.808	229.817	196.168	250.111	82.7529	248.501	165.406	185.269	129.152	0
CWH41	278.269	362.397	552.935	559.971	326.169	346.314	375.865	368.436	407.301	562.087	395.831	549.207	0
CWH43	509.613	805.838	624.832	679.061	979.331	617.546	627.371	516.685	500.013	573.212	525.883	529.089	0
CWP1	341.765	396.889	593.506	727.919	727.72	669.623	717.994	981.793	516.693	974.373	655.568	738.047	0
CYB2	974.677	2214.39	4330.56	4795.76	5033.91	2804.29	2406.22	1437.59	3337.7	4694.67	3015.66	2530.71	0
CYB5	1269.41	1406.3	3035.7	2443.55	2403.16	2945.75	2617.13	2737.43	1613.44	1420.92	1921.78	1869.32	0
CYC1	1900.52	1400.6	3400.35	3425.88	3694.72	5352.1	6027.29	5437.91	5631.29	5561.04	6730.06	6465.57	0
CYC2	314.891	333.734	320.44	280.46	286.759	336.559	335.607	309.564	401.394	368.857	375.264	344.328	0
CYC3	2001.23	1902.93	1244.67	1970.72	1899.39	1856.73	2000.55	2828.35	1759.93	2823.93	3259.33	2621.99	0
CYC7	1160.61	551.959	672.461	483.94	317.549	293.919	356.703	282.331	262.304	1991.69	283.238	258.405	1
CYC8	247.004	339.592	316.702	373.042	465.377	360.435	354.752	456.552	408.124	588.718	550.239	649.653	0
CYK3	425.626	382.967	573.228	687.262	586.26	454.651	436.35	455.192	437.908	724.452	714.934	704.857	0
CYM1	194.126	181.898	239.372	294.725	238.756	331.556	323.222	298.543	358.575	496.852	483.495	576.509	0
CYR1	127.488	157.864	281.861	220.133	292.845	176.175	140.33	180.41	114.377	223.097	167.847	177.467	0
CYS3	1019.92	971.575	1217.91	1853.03	1720.79	2641.79	3166.84	3714.29	3416.45	2897.15	3802.3	5186.44	0
CYS4	812.737	756.198	1853.96	1370.88	1898.43	1585.45	1094.84	801.369	1216.86	1479.13	1727.77	1710.42	0
CYT1	1513.4	1752.93	2616.68	2386.82	2589.29	2355.49	2534.71	2119.44	2772.89	2233.44	2184.29	2416.21	0
CYT2	216.315	311.134	940.745	1136.08	1293.64	1292.19	1234.55	1319.23	1633.07	1577.86	1951.02	1693.94	0
DAD1	652.667	404.59	631.539	467.295	387.531	576.62	651.637	445.51	820.853	585.341	471.534	513.091	0
DAD2	67.9034	47.8553	114.259	68.3646	58.8397	68.7002	103.124	56.6755	105.182	103.52	120.439	127.146	0
DAK1	1201.79	1623.08	1372.37	1656.92	1629.6	1214.01	1316.08	1433.75	984.916	1661.48	1201.79	852.337	0
DAK2	148.166	119.945	64.6198	80.4768	59.0294	53.2713	44.823	47.7858	58.9248	68.764	57.3707	82.3615	7
DAL1	218.275	178.393	157.294	146.186	115.53	237.316	171.202	214.44	177.275	267.908	181.106	176.798	2
DAL2	274.585	159.284	120.264	193.447	149.533	242.575	238.028	177.163	172.54	131.514	169.674	204.622	0
DAL3	382.445	456.531	888.124	1033.38	1188.17	1164.72	1026.13	811.932	773.608	796.346	732.548	546.139	0
DAL4	182.456	138.398	124.477	163.813	99.8422	130.049	112.759	116.434	130.744	144.891	117.585	133.273	0
DAL5	312.521	219.58	316.696	283.073	297.358	172.126	265.12	325.383	197.186	295.366	208.914	227.831	0
DAL7	232.248	102.95	119.893	173.454	160.811	194.766	142.549	120.917	153.031	90.5828	141.488	103.31	0
DAL80	126.475	74.1784	57.1069	64.0364	60.4041	51.6306	51.5746	73.6473	51.0189	41.4412	41.3482	48.4934	6
DAL81	181.176	123.645	121.999	103.5	87.8	91.6462	94.5266	93.9185	116.595	96.2172	153.711	186.215	0
DAL82	772.757	986.485	586.294	765.626	555.556	496.561	530.708	701.023	486.498	482.703	478.215	479.199	0
DAM1	272.248	257.043	177.863	205.799	215.521	264.749	224.562	180.737	253.601	200.778	261.857	328.078	0
DAN1	25.4573	19.3495	89.4604	105.941	83.2847	44.9592	45.3453	66.4811	23.3523	27.5655	23.2295	22.3258	5
DAN2	550.237	394.365	660.775	1063.83	937.358	530.09	554.07	632.012	313.823	227.535	239.371	287.565	0
DAN3	193.494	152.072	383.607	562.705	508.982	236.048	255.845	314.256	133.939	118.534	127.646	147.342	0
DAN4	519.674	378.854	436.094	452.02	477	496.763	393.175	557.23	338.157	433.189	288.95	356.53	0
DAP1	2973.06	3656.21	3462.06	3501.27	2961.88	1472.61	1548.31	1900.01	1372.51	1310.3	1190.03	1222.13	0
DAP2	996.16	1382.7	1766.82	1841.93	1670.89	946.061	1082.24	522.427	909.411	1371.49	946.74	1082.79	0
DAT1	619.008	643.289	488.579	411.123	438.721	321.421	363.549	470.496	623.78	279.582	489.148	518.432	0
DBF2	126.184	123.323	210.956	214.962	164.212	167.864	151.998	62.2778	152.655	199.622	150.827	157.173	0
DBF20	361.226	537.461	389.427	505.736	376.128	381.739	426.791	490.928	260.952	222.066	212.339	188.462	3
DBF4	252.595	283.266	146.54	197.909	224.248	164.952	185.076	231.544	193.97	188.735	267.934	178.425	0
DBP1	342.32	421.021	86.5583	180.386	291.19	168.498	193.346	220.483	83.24	90.9647	89.8246	58.9156	0
DBP10	829.191	1047.71	1097.78	863.49	621.263	539.638	670.513	1025.35	672.993	593.852	810.082	1251.91	0
DBP2	947.356	561.635	1182.27	1235.3	1273.87	1785.36	2075.81	2108.02	1653.88	1240.02	2591.11	1977.72	0
DBP3	865.832	453.422	508.133	539.472	465.376	818.013	923.549	674.743	958.388	551.557	967.058	848.328	0
DBP5	1405.27	1754.93	1798.38	1349.9	1545.39	1752.51	1710.56	2035.12	1650.14	1823.86	1782.28	1458.35	0
DBP6	335.728	467.951	333.129	389.125	323.424	487.735	556.967	525.006	509.703	332.509	526.685	570.231	0
DBP7	302.896	306.814	612.709	517.647	326.367	401.472	487.2	569.05	360.669	237.245	537.826	888.485	0
DBP8	745.231	460.844	447.109	546.374	413.457	558.418	546.348	579.019	706.102	300.618	844.56	805.342	0
DBP9	828.874	747.395	901.496	967.417	738.336	977.328	1171.93	1048.29	1032.69	900.281	1236.87	1255.29	0
DBR1	211.74	248.768	201.25	232.514	208.79	188.326	199.898	221.696	163.664	105.074	115.293	73.1991	0
DCC1	442.104	412.724	305.205	319.907	274.017	310.263	297.71	368.877	332.499	253.752	262.429	250.217	0
DCD1	328.673	279.759	316.519	325.089	200.688	452.492	445.014	407.054	612.464	565.769	609.685	546.925	0
DCG1	60.3694	36.9744	72.1046	64.845	65.9509	109.056	112.788	72.1116	102.739	72.9843	95.2367	98.2655	0
DCI1	47.5201	58.6199	32.6479	21.8424	39.5766	26.9571	30.5244	26.5184	20.963	5.4428	9.9133	5.0799	0
DCP1	99.4855	169.864	119.835	111.798	128.756	143.475	137.163	104.452	118.333	147.399	116.226	119.958	0
DCP2	85.2422	128.557	131.411	110.374	152.769	129.626	134.353	114.548	88.2535	117.917	115.055	115.803	0
DCS1	772.038	417.765	331.344	484.381	723.823	480.921	697.447	500.292	398.526	515.392	383.324	266.567	0
DCS2	2359.49	2426.45	2143.66	2140.07	2363.19	1178.12	1295.57	1468.59	382.755	922.194	140.581	136	0
DCW1	1546.02	1645.11	3035.21	2987.53	2270.4	1827.84	1881.09	2051.34	1939.78	2607.75	2330.11	1791.33	0
DDC1	94.5814	115.38	61.5893	90.2453	87.687	39.5173	110.15	81.4443	97.2175	69.5471	94.1625	72.4486	0
DDI1	1807.22	1402.12	833.606	1262.17	959.315	950.835	962.105	1091.61	952.068	776.458	604.922	521.152	0
DDP1	979.026	2143.95	760.794	1357.13	1368.42	990.717	1122.02	1231.68	1001.11	928.49	751.021	676.283	0
DDR48	3858.54	2798.74	3284.64	2944.59	3468.04	1753.19	1792.37	1574.79	730.622	1614.58	640.056	490.707	0
DED1	518.159	893.459	305.376	503.335	244.311	809.565	1013.81	1262.92	735.837	668.396	926.864	636.73	0
DED81	1952.42	1757.41	2033.74	2438.76	2236.07	2354.37	2487.22	2228.62	2314.21	2166.44	2323.13	2353.18	0
DEF1	1191	712.75	876.595	868.483	1606.49	688.504	943.745	1325.12	1127.94	1046.49	1439.28	1025.51	0
DEG1	159.944	162.94	140.308	188.868	125.113	210.444	218.588	224.098	293.35	163.878	246.75	224.812	0
DEM1	369.395	358.752	285.591	260.871	231.063	302.307	342.465	280.433	359.79	268.101	277.566	279.809	0
DEP1	315.794	431.5	126.117	319.093	260.032	305.078	357.214	569.078	361.337	379.567	500.723	354.306	0
DER1	89.0172	41.8709	64.1483	47.3371	47.0488	45.2492	57.1908	20.8282	57.7342	63.4957	48.5059	41.6148	0
DFG10	162.062	151.266	244.628	190.604	135.713	141.232	147.401	105.083	208.692	264.702	310.599	423.839	0
DFG16	26.1015	35.5613	17.7985	19.8239	41.9437	22.3189	25.254	21.466	19.1006	21.8955	33.9409	18.2512	7
DFG5	2951.29	2768.97	2790.78	3374.45	2624.22	2512.95	2749.29	3141.89	2347.81	2168.37	1745.29	1865.89	0
DFR1	265.634	420.324	405.859	398.826	161.628	486.583	446.971	494.757	444.43	331.95	526.678	685.042	0
DGA1	472.428	728.66	719.74	681.611	756.844	433.905	440.416	420.271	285.547	463.855	318.239	269.024	0
DHH1	272.957	267.339	329.911	270.867	185.311	195.101	306.644	407.2	298.646	281.325	315.493	302.319	0
DHR2	134.155	98.5309	169.993	175.061	125.069	267.852	287.169	333.304	264.026	189.574	284.21	272.18	0
DIA1	253.086	265.447	517.892	727.752	427.626	462.941	471.415	351.774	515.986	884.52	519.714	507.983	0
DIA2	225.806	229.791	188.963	196.296	160.225	172.748	209.444	236.397	184.776	219.013	171.799	133.817	0
DIA3	300.423	216.048	236.201	271.941	180.898	131.126	107.323	112.731	103.588	123.432	105.483	90.9663	0
DIA4	132.017	110.647	118.096	81.9572	110.564	129.778	115.822	107.864	179.505	173.88	162.81	183.544	0
DIB1	3858.73	3638.27	2455.59	3158.94	1661.24	2186.04	2320.8	3036.72	3274.91	2812.74	2174.11	2403.44	0
DIC1	4185.77	4627.92	2290.16	3461.48	3974.41	3517.56	3854.01	4483.34	3767.4	1743.12	2070.31	1326.53	0
DID2	407.3	340.868	481.155	523.713	496.849	547.132	516.381	418.094	623.96	709.33	612.973	589.647	0
DID4	421.417	816.404	1374.81	1373.1	1696.67	1331.85	1118.85	1328.42	1448.75	1181.03	1176.52	1032.32	0
DIE2	351.972	344.863	349.255	360.419	283.31	360.259	361.188	316.817	430.555	435.942	461.632	804.907	0
DIG1	731.87	909.165	273.98	575.786	545.939	473.408	539.262	797.662	515.81	517.052	644.378	737.963	0
DIG2	323.004	217.048	152.534	169.464	160.009	175.659	189.571	219.132	212.865	229.422	233.302	211.489	0
DIM1	194.446	244.352	610.081	407.828	340.962	500.821	475.565	371.521	601.891	353.938	448.201	503.756	0
DIN7	203.457	183.156	153.254	150.724	120.65	118.635	136.3	139.871	144.373	137.824	121.432	135.128	0
DIP2	158.003	272.614	496.814	403.472	497.346	514.04	603.047	736.594	639.204	607.291	999.406	886.508	1
DIP5	752.546	304.018	77.2597	90.6902	82.1273	95.8739	87.173	121.6	139.877	81.38	77.8611	77.9611	3
DIS3	358.258	630.853	611.079	763.318	670.611	580.03	582.672	647.565	499.941	778.787	704.054	862.811	0
DIT1	60.8959	48.6229	29.8119	40.3453	50.9029	50.0883	47.7859	34.4793	63.6062	26.7555	23.1001	18.003	6
DIT2	40.7922	31.9944	24.3168	30.7485	22.6079	27.0882	25.3286	23.7055	31.2675	27.6343	19.3361	25.7206	11
DJP1	177.089	161.085	144.934	166.938	156.103	145.05	155.253	108.302	206.719	128.061	121.466	133.635	0
DLD1	2050.21	3228.1	1760.45	3075.26	3131.27	3651.95	3713.46	3974.22	4647.01	3212.45	3452.28	2514.07	0
DLD2	875.837	1194.36	1080.76	1130	1267.26	1293.75	1461.99	1123.49	1725.62	1155.87	1128.06	1015.06	0
DLD3	1623.98	1511.4	2305.58	2960.25	2678.58	2621.03	2231.51	2055.46	3023.11	2946.94	3050.46	3080.85	0
DLS1	410.494	838.079	604.554	855.655	859.422	919.897	948.225	1246.99	872.893	1145.43	1102.3	986.594	0
DMC1	239.309	169.877	150.381	134.34	104.927	89.4255	88.7641	115.477	123.828	83.5682	83.6051	90.9727	0
DML1	120.702	142.704	118.935	119.799	134.887	153.676	163.903	142.579	124.626	101.477	126.281	85.8971	0
DNA2	117.712	116.792	143.188	119.232	126.688	94.2148	90.4527	100.548	68.9487	148.326	124.689	145.424	0
DNF1	1340.89	1148.74	1103.03	1293.94	1170.71	864.541	847.813	1014.97	941.674	1305.89	1461.19	1915.18	0
DNF2	76.7952	120.507	87.0366	97.5685	130.297	121.123	130.513	139.654	114.832	133.546	154.931	177.4	0
DNF3	23.1315	52.0699	271.217	80.5381	139.919	81.3958	54.7068	73.6753	40.6763	75.05	75.939	75.7813	0
DNL4	547.791	590.286	335.043	424.892	371.175	281.575	323.687	395.782	305.295	213.831	201.255	198.538	0
DNM1	188.765	297.959	496.478	387.278	610.293	776.147	767.49	778.495	751.436	632.277	654.524	479.303	0
DOA1	517.209	793.71	738.896	821.36	891.752	830.379	954.953	1075.98	580.929	867.224	794.783	645.991	0
DOA4	106.386	125.946	139.056	157.056	181.215	121.464	128.372	99.5753	95.5524	146.274	164.493	177.61	4
DOC1	39.4857	47.7271	33.811	38.2413	28.8341	36.844	38.377	33.8528	38.7594	34.0404	32.0282	27.317	3
DOG1	7	13	4	3	9	5	17	11	1	14	13	12	7
DOG2	652.72	444.526	501.747	587.834	502.647	752.406	603.99	576.621	805.912	836.258	627.23	423.81	0
DOM34	271.949	275.195	500.026	379.123	274.974	343.42	447.208	266.304	463.713	352.295	252.248	253.21	0
DON1	181.573	287.317	176.745	260.604	176.955	105.299	107.857	55.5818	117.707	106.67	75.0178	87.3539	0
DOP1	136.077	163.783	280.181	255.557	296.332	189.982	207.058	87.1353	135.492	230.934	185.47	136.819	0
DOS2	585.927	569.547	580.055	427.834	350.574	408.014	352.953	369.572	422.931	340.114	329.476	385.008	0
DOT1	167.487	182.239	252.301	271.578	169.254	193.077	231.832	218.375	233.746	260.076	298.185	372.994	0
DOT5	371.185	218.881	359.411	374.553	460.865	482.118	544.111	261.577	485.843	434.829	529.679	472.496	0
DOT6	247.306	287.563	322.88	412.489	341.139	147.374	221.032	151.258	191.049	265.999	187.201	306.014	0
DPB11	193.426	70.6909	245.938	225.192	199.915	196.811	195.132	197.948	217.913	224.832	225.273	289.531	0
DPB2	228.118	268.258	292.137	292.76	240.26	363.214	433.075	477.901	484.941	496.886	600.778	731.272	0
DPB3	1465.97	1493.75	1011.35	950.34	805.834	709.943	627.42	841.759	757.446	600.431	543.942	594.701	0
DPB4	172.362	240.37	209.388	229.208	160.486	212.636	231.583	171.608	241.116	120.838	170.555	182.683	0
DPH2	677.628	1080.47	618.543	880.436	863.937	1038.65	1283.26	1548.16	1081.27	1038.72	1467.02	1511.29	0
DPH5	648.446	599.571	442.959	855.535	964.779	1087.84	1233.16	1327.81	1126.97	1305.7	2037.99	2061.23	0
DPL1	2305.29	2358.14	1962.03	2135.83	1891.29	1741.6	1740.96	1858.88	1659.31	1790.51	1751.98	1877.65	0
DPM1	1263.57	2166.17	758.039	1500.8	1521.18	1452.38	1634.94	1948.77	1800.97	1681.87	1922.05	2225.22	0
DPP1	909.293	1306.64	916.779	1161.71	935.072	946.514	814.97	956.563	1017.4	1182.39	859.113	750.4	0
DPS1	3073.8	2956.69	1564.85	2340.01	2515.23	2549.94	3086.89	3302.39	2213.23	2236.37	2868.51	2712.5	0
DRE2	1664.6	824.441	1315.1	1285.66	1287.26	1165.42	1420.76	1070.46	412.95	1655.24	2060.06	1905.23	0
DRS1	176.544	159.707	307.913	268.283	194.331	282.763	297.647	349.411	281.922	219.788	412.339	502.951	0
DRS2	298.396	109.594	519.716	333.249	354.175	196.045	241.928	325.416	235.132	267.235	338.5	376.59	0
DSE1	52.2999	19.9815	75.8362	94.1677	114.897	101.327	84.3033	37.1113	56.3916	128.74	97.7529	78.4704	0
DSE2	1720.59	1039.12	1656.56	2249.85	1586.58	1509.94	1611.38	1638.6	2115.71	3034.8	3595.77	3980.35	0
DSE3	190.182	153.438	324.733	445.553	318.132	371.238	413.478	364.935	347.065	249.179	395.453	423.659	0
DSE4	160.364	109.833	428.074	445.179	336.811	236.609	253.24	233.727	229.197	281.942	292.183	372.65	0
DSK2	3990.22	4276.68	1397.03	2216.62	2263.41	3487.14	4150.46	4294.86	3613.79	3106.87	3873.49	3677.86	0
DSL1	126.694	131.704	116.012	135.443	194.33	135.103	170.194	119.817	108.971	121.296	128.07	100.455	0
DSN1	281.017	258.01	342.279	351.924	265.928	215.489	201.962	248.924	263.553	368.557	405.982	513.814	0
DSS4	344.04	679.308	353.117	311.847	381.176	448.796	467.587	514.467	451.036	398.001	427.218	288.585	0
DST1	367.846	349.659	461.88	576.363	339.413	471.043	563.557	149.603	493.8	461.118	443.34	463.812	0
DTD1	599.89	938.817	1055.91	883.147	1186.02	1508.67	982.861	1180.9	1409.06	1629.09	1466.43	834.163	0
DTR1	62.3363	44.0666	66.3154	80.0014	57.3551	79.776	53.6649	74.4325	83.981	59.5598	62.0782	66.6819	11
DUN1	141.614	177.262	252.115	165.952	175.958	237.801	228.948	227.734	301.639	251.69	239.644	286.707	0
DUO1	823.093	637.648	642.899	631.289	390.073	522.964	658.045	542.977	769.751	533.803	571.665	689.996	0
DUR1,2	372.308	372.338	344.256	332.879	280.302	222.562	178.3	229.285	315.553	190.688	155.707	205.97	0
DUR3	329.907	212.31	248.907	241.966	241.897	179.125	181.814	168.588	131.275	121.967	112.563	125.573	0
DUS1	104.171	81.6934	119.787	147.683	152.801	135.121	182.908	141.966	174.54	100.21	215.268	198.07	0
DUT1	1239.15	1628.24	2194.91	2949.87	2298.3	2326.35	2349.29	1795.6	2882.43	3247.37	3118.26	2810.01	0
DYN1	193.275	268.593	288.358	328.777	371.726	284.25	343.346	361.366	190.162	271.511	301.984	199.868	0
DYN2	3134.74	2595.36	3241.12	2130.5	1937.96	2511.79	2606.8	2637.51	3125.25	2156.98	2015.87	2215.81	0
DYS1	552.036	386.06	687.232	759.143	559.517	764.183	782.248	723.115	896.049	1142.74	1330.07	1271.41	0
EAF3	1238.54	2456.96	1180.09	1701.94	1931.58	1462.16	1531.89	1644.31	1277.35	1248.94	1183.84	1014.49	0
EAF5	452.752	367.087	352.981	416.63	280.683	347.2	307.098	329.065	453.028	434.72	393.634	467.008	0
EAF6	249.146	144.134	289.832	240.15	226.453	197.641	228.79	227.357	185.794	224.165	197.316	233.248	0
EAP1	721.372	452.212	291.185	463.21	451.889	437.139	547.753	666.044	632.492	601.001	706.48	1119.63	0
EBP2	97.1364	115.825	527.592	465.66	433.109	459.042	484.246	613.842	709.753	307.381	662.523	781.476	0
EBS1	1446.89	1282.2	583.348	939.317	835.702	995.265	1051.01	936.374	1135.77	714.223	928.856	743.539	0
ECI1	1254.25	1516.04	857.287	978.487	1032.61	521.101	571.037	615.524	408.094	167.23	112.921	53.1188	0
ECM1	1166.78	262.36	1149.69	1147.46	644.232	1108.36	1119.52	1292.89	1592.98	623.906	1049.4	953.159	0
ECM10	340.843	332.041	153.91	272.703	254.111	230.744	215.868	198.368	277.792	241.418	200.325	216.299	0
ECM11	48.0595	40.9321	31.5687	36.1954	24.3898	29.1375	28.2501	38.1288	38.4319	33.854	34.6739	40.7477	12
ECM12	57.9839	63.2109	44.0462	46.1097	38.1035	32.8914	25.8603	36.3103	32.0124	33.6567	32.3056	35.0463	12
ECM13	2516.95	2125.66	1208.26	1545.01	1304.17	1559.75	1706.09	1470.59	1590.46	4053.02	2488.45	1339.91	0
ECM14	1506.94	1286.78	1306.16	2070.32	1603.96	1245.45	1353.9	1068.66	1306.3	880.499	789.949	725.029	0
ECM15	3946.7	5209.3	3986.49	3922.62	3502.5	3253.78	3184.97	3575.19	3282.21	2438.92	1658.89	1379.45	0
ECM16	204.912	183.662	234.549	192.841	211.527	308.455	334.588	385.227	252.345	235.731	411.98	412.729	0
ECM17	1695.25	2095.9	3059.89	2874.91	3337.49	3181.37	3527.85	3259.58	3430.32	2893.68	3533.23	3537.81	0
ECM18	38.2506	65.997	31.751	32.1435	36.1863	29.9836	37.1405	52.9504	33.5883	35.7654	43.5398	31.0832	12
ECM19	1260.54	1681.67	1542.66	2011.3	1744.72	1587.42	1683.9	1495.48	2570.33	2194.5	2265.29	3461.87	0
ECM2	71.2854	77.5411	57.6378	65.273	62.0566	70.8326	62.2262	68.6395	62.2785	81.1527	76.4097	58.9896	5
ECM21	611.989	824.146	678.456	924.049	906.859	719.256	701.945	747.515	563.206	458.253	431.388	656.307	0
ECM22	239.087	386.36	633.453	456.784	645.193	359.103	352.391	402.331	320.386	401.691	335.102	330.539	0
ECM23	39.5042	31.4264	29.7674	37.2522	25.6438	36.8685	34.6078	50.9861	42.0591	49.5424	48.614	47.1779	12
ECM25	129.222	132.039	163.166	200.822	125.194	183.744	163.515	243.982	170.726	206.743	195.31	294.902	0
ECM27	39.3761	38.2433	51.3308	55.4574	54.1527	25.229	33.456	36.0679	32.261	36.6904	38.7783	34.7331	9
ECM29	92.0584	81.0521	121.031	118.736	104.266	100.761	97.5364	66.419	100.001	119.274	86.7897	93.534	0
ECM3	163.119	171.959	117.665	213.222	226.275	170.61	181.733	115.727	173.347	492.457	367.786	373.871	0
ECM30	79.5828	154.79	171.51	146.991	175.765	133.662	149.838	155.438	80.2429	140.631	142.767	118.071	0
ECM31	465.44	463.086	537.456	666.171	544.82	655.382	724.674	643.497	691.163	686.91	786.796	547.326	0
ECM32	402.154	366.813	271.032	399.374	357.052	348.316	330.075	350.645	350.184	247.618	355.925	320.385	0
ECM33	7265.7	6483.43	7274.73	6827.03	8505.1	7257.08	8862.5	8901.74	8239.16	7829.43	9153.93	8914.12	0
ECM34	95.179	105.797	56.646	30.1612	26.3384	22.6258	25.0403	35.4358	23.9181	26.2094	18.701	27.6806	0
ECM37	349.868	292.577	174.92	157.631	172.467	141.218	148.777	139.031	118.278	88.4843	93.3716	124.561	0
ECM38	570.896	510.673	286.04	466.452	568.491	400.467	418.554	566.043	294.785	499.357	469.764	416.083	0
ECM39	262.87	418.837	438.232	410.396	469.373	477.49	540.418	536.956	517.203	274.807	371.458	341.322	0
ECM4	1051.68	1388.74	979.933	1283.85	1775.85	779.128	902.839	1021.94	407.417	419.472	335.815	397.114	0
ECM40	1218.01	1673.11	2103.32	2462.53	1697.89	1681.2	1831.91	2059.01	1085.82	1538.63	1335.72	1339.41	0
ECM5	60.0674	69.6428	119.364	89.4711	122.194	73.4137	69.667	50.7896	47.201	65.9349	64.5926	64.3919	0
ECM7	262.412	305.09	313.223	299.089	246.002	224.332	238.818	257.378	179.037	224.729	243.949	247.545	0
ECM8	179.446	143.525	155.285	55.6877	48.6345	30.0998	39.6718	75.5937	64.604	86.9496	29.3301	81.4131	4
ECM9	315.781	183.604	309.397	260.027	210.98	192.941	217.021	205.365	263.722	260.306	253.358	259.554	0
ECO1	907.635	671.637	328.294	417.423	251.248	279.083	316.677	322.047	360.181	204.015	244.886	260.461	0
EDC1	61.6496	61.6884	55.3471	52.7897	40.9335	53.0742	48.4076	76.5544	71.2575	47.614	60.777	68.2632	12
EDC2	911.617	755.125	417.589	791.634	612.819	441.757	491.788	455.594	249.506	343.195	202.414	199.995	0
EDE1	1406.29	1400.88	1138.35	1392.97	1540.99	693.518	900.349	844.39	888.537	1505.53	1118.04	905.049	0
EFB1	4128.76	7166.42	15087.3	11979.7	15800.6	12039.7	11912.5	12217.5	9720.83	12466.5	14055.1	12872.8	0
EFR3	223.335	289.197	421.405	288.144	322.316	360.531	379.595	341.425	281.711	454.95	441.875	376.996	0
EFT1	6265.58	7186.29	5293.97	4746.61	6584.06	6224.15	6657.44	6699.91	5883.34	6602.28	6879.99	6063.34	0
EGD1	6943.87	8649.04	8379.36	8102.55	7507.29	7878.41	8346.11	8692.35	9520.42	7638.38	8541.4	7574.22	0
EGD2	6203.51	7161.96	6694.67	7610.42	7830.36	6492.32	6883.92	4743.67	7056.27	7202.8	7832.45	9175.57	0
EGT2	278.239	154.462	591.051	859.732	911.152	757.91	674.714	719.822	657.841	653.536	891.114	1199.75	0
EHD3	271.659	181.366	351.055	132.011	283.472	348.601	269.381	215.373	323.85	192.79	176.616	198.088	1
EHT1	796.987	1130.81	1693.14	1955.64	1917.38	1833.53	1761.02	1944.68	1372.35	2252.78	2048.52	2662.24	0
EKI1	399.47	371.026	456.692	356.957	251.009	327.482	350.014	353.266	262.996	301.158	261.113	310.84	0
ELA1	222.262	248.265	99.2045	111.611	137.636	172.821	183.485	243.358	154.555	124.386	200.318	171.076	0
ELC1	365.382	414.168	574.012	493.171	296.977	490.021	602.668	518.752	623.942	561.419	434.206	467.564	0
ELG1	150.569	219.657	267.393	266.837	213.975	288.455	329.18	326.936	284.973	271.308	349.789	378.574	0
ELM1	209.727	168.918	170.3	165.652	149.93	189.684	215.453	292.135	168.864	152.704	193.02	143.107	0
ELO1	575.788	871.834	922.768	786.315	1188.84	1003.86	993.685	1204.94	774.152	1530.65	1229.1	773.849	0
ELP2	33.8386	48.7332	52.6138	42.5528	49.6743	63.6976	50.8024	40.2574	59.9048	64.8659	48.5909	53.2424	0
ELP3	625.496	836.172	511.088	553.992	490.089	766.628	910.256	835.089	891.707	755.184	830.138	716.862	0
ELP4	298.463	902.263	659.972	949.305	863.263	1040.43	1013.68	1158.37	967.107	789.511	1031.82	716.941	0
ELP6	81.9408	125.991	143.8	176.287	138.271	143.41	147.545	167.109	133.23	130.2	174.925	223.631	0
EMG1	745.552	922.901	1366.02	1643.62	1107.99	1412.68	1507.43	1755.96	1720.75	1668.73	2342.52	1845.19	0
EMI1	1275.76	2112.29	1394.74	1685.28	1580.28	1402.69	1155.05	1416.34	1408.05	1374.71	736.224	838.918	0
EMI2	2718.45	2307.92	1676.03	2267.39	1812	1322.46	1415.16	1550.64	1880.56	4544.17	1843.78	1651.99	0
EMI5	1114.63	1465.54	991.618	1258.84	1330.25	862.261	1003.62	951.139	920.959	979.461	905.501	849.043	0
EMP24	4819.19	5446.73	4233.47	4892.4	4999.17	4796.29	4340.18	4927.32	5212.19	5028.15	4513.5	3943.91	0
EMP46	740.783	620.106	545.769	464.463	522.198	337.919	322.458	355.61	258.16	198.41	141.757	110.34	0
EMP47	1343.11	1054.27	1069.26	995.066	940.841	843.557	939.545	726.777	998.526	798.152	604.369	612.648	0
EMP70	889.752	936.805	1217.16	1224.84	1200.21	1265.54	1625.6	1543.53	1106.6	1317.4	1495	1358.7	0
ENA2	24.0861	29.4025	27.7901	19.0542	25.5066	21.3683	19.5605	14.1884	15.7518	15.4344	7.878	11.5158	11
ENA5	36.7966	36.4559	34.6963	21.9034	14.9809	23.669	18.9852	40.7695	30.2647	29.2481	27.6777	28.2094	12
ENB1	918.217	1012.09	1207.28	1448.6	1321.26	525.779	541.645	725.329	1173.88	2521.75	2142.48	1744.78	0
END3	257.076	353.966	365.295	321.795	301.363	314.175	318.398	327.452	364.106	337.574	216.749	214.889	0
ENO1	13042.9	11570.3	11071.1	12671.3	14919.5	9083.33	8234.79	7145.79	2382.85	6361.83	5366.24	4119.92	0
ENO2	10583.9	11231.5	7625.09	10470.1	9563.92	7819.21	7900.74	7345.65	6983.28	10012.4	9561.93	10156	0
ENP1	137.582	123.183	162.792	223.495	212.468	342.138	327.567	310.922	389.534	161.832	448.813	547.723	0
ENT1	539.317	712.515	646.031	537.064	590.446	486.638	483.41	536.437	495.735	554.057	499.179	577.469	0
ENT2	897.086	576.083	857.35	466.878	1318.08	184.137	240.91	406.474	421.729	632.207	499.033	309.264	0
ENT3	1660.83	1577.64	1358.02	1756.27	1534.63	1413.8	1555.54	1606.49	1207.27	1521.04	1333.98	1026.02	0
ENT4	46.5964	68.8893	31.5092	38.8357	42.0931	48.4954	56.3637	93.5083	50.5445	39.6757	47.3951	31.3385	1
ENT5	1399.85	1201.32	1006.25	953.394	784.256	735.241	856.877	970.227	932.987	676.295	819.111	1116.83	0
EPL1	125.039	28.1872	74.7146	35.7286	75.9633	27.3814	27.258	15.7915	15.8715	13.0075	21.5146	21.9	0
EPS1	703.486	430.758	679.316	569.244	572.574	497.93	494.045	286.82	428.585	463.387	613.069	725.586	0
EPT1	347.255	232.029	307.25	277.794	290.925	404.243	386.608	381.512	377.867	584.905	637.029	586.064	1
ERB1	530.697	459.232	696.729	568.848	639.68	845.811	859.69	867.095	789.399	916.952	1179.57	1493.26	0
ERD1	125.074	119.052	113.228	127.691	112.847	145.405	154.659	123.283	182.21	174.85	208.105	191.657	0
ERD2	428.066	594.37	560.303	491.411	512.108	560.063	588.905	529.078	383.324	540.213	400.657	273.516	0
ERF2	143.502	182.673	143.955	168.203	169.016	139.67	156.225	139.548	124.455	124.69	125.9	108.542	0
ERG1	4340.8	3866.44	4792.19	5308.33	5014.36	4648.36	4543.91	4115.98	2932.81	2321.47	2234.3	2076.16	0
ERG10	6680.57	7868.5	7260.96	8860.93	8286.83	7514.03	8211.15	7086.89	6058.96	6591.03	6383.53	5353.62	0
ERG11	10198.8	8454.48	9821.14	7707.95	9100.76	7399.39	6908.29	6964.25	4957.87	3439.81	3871.85	4258.84	0
ERG12	185.511	260.838	356.41	240.129	387.738	382.322	339.017	302.045	202.763	223.02	282.896	262.891	0
ERG13	1674.03	2249.01	1852.73	2444.72	2847.74	2693.18	3118.87	3166.2	1745.58	1970.91	2196.07	1490.96	0
ERG2	5216.91	6260.29	7206.12	8031.42	7669.75	7914.2	8129.83	8621.08	5834.05	5857.33	5480.44	4094.59	0
ERG20	791.27	834.36	2083.33	1925.36	2128.29	1891.4	2233.58	2117.38	1674.05	1881.51	2189.77	2180.07	0
ERG24	831.06	1050.04	1062.62	1170.52	1283.45	1361.94	1557.36	1626.31	568.987	541.819	664.423	562.891	0
ERG25	9406.86	8826.92	9554.68	11431.9	8848.91	8641.21	9739.13	7598.78	6251.66	3711.34	3886.53	4129.27	0
ERG26	1259.74	1322.95	2031.28	2740.56	2418.12	2596.54	2387.51	2239.54	1841.94	1738.01	1282.4	929.434	0
ERG27	2555.36	1582.78	2976.73	3343.44	2870.6	2875.45	2996.94	2702.69	2303.54	1922.43	1879.56	1591.87	0
ERG28	2959.94	2798.53	3184.16	3189.32	2612.14	2931.28	2844.22	2661.55	2594.35	2786.61	2507.15	2847.84	0
ERG3	8104.13	6929.92	9506.46	10860.7	11012.7	9566.89	10712.1	11470.4	5132.33	4361.97	5372.06	4730.95	0
ERG4	1069.63	1126.28	2485.05	2190.82	2778.54	3069.34	2932.66	2484.03	2393	1696.48	1610.98	1290.3	0
ERG5	4023.96	2763.84	3761.42	3746.6	4407.43	3538.85	3948.54	3690.73	1905.65	2069.99	2299.87	2259.73	0
ERG6	2604.16	3367.11	4877.27	5448.72	5943.42	5288.88	5595.07	5455.94	3801.87	2396.75	2546.06	2670.68	0
ERG7	825.509	1031.02	886.74	1340.73	1208.91	1323.54	1120.13	1081.51	840.637	783.281	755.732	719.201	0
ERG8	391.147	811.797	906.545	1125.51	1226.7	1273.18	1221.67	1300.78	952.588	960.809	1006.36	790.535	0
ERG9	1274.09	1585.88	2206.95	2057.24	2298.65	1869.79	1648.47	1387.89	967.976	1485.91	1316.12	1337.33	0
ERO1	44.308	52.9377	97.1863	56.2775	63.1547	74.5903	60.8327	67.5373	42.1472	91.9681	57.7831	59.8141	0
ERP1	1754.5	537.112	2731.31	2453.17	2544.68	2155.47	2014.71	2280.04	2307.25	2926.48	2243.33	2100.41	0
ERP2	173.63	197.607	671.305	507.898	580.99	735.028	824.08	757.138	563.366	674.867	641.361	638.133	0
ERP3	126.449	211.549	149.81	121.183	174.151	189.892	144.11	176.954	202.518	219.496	120.342	99.3632	0
ERP4	296.158	428.775	349.422	238.445	353.8	365.867	333.172	309.345	282.091	258.08	248.045	230.355	0
ERP5	2568.73	2069.38	1896.23	1668.58	1372.17	1879.78	1782.16	1773.31	2288.64	1719.64	1565.16	1625.3	0
ERP6	924.004	941.484	502.376	601.287	584.617	678.832	692.15	687.511	680.174	645.729	642.219	422.997	0
ERS1	963.805	1257.41	1011.74	1131.43	1039.53	915.427	822.67	1099.63	899.131	1081.39	770.446	733.678	0
ERV1	2064.75	1304.74	1092.64	1169.84	1341.27	1919.14	1684.37	1462.37	1886.87	1524.24	1629.41	979.996	0
ERV14	1174.41	1087.88	982.794	579.503	630.916	1058.84	1188.05	728.703	1118.36	915.194	803.857	609.517	0
ERV15	578.712	758.621	698.761	582.93	620.364	818.588	772.642	857.083	836.612	840.641	721.597	606.597	0
ERV2	1817.07	2356.46	1567.67	2489.58	1805.66	1859.55	1715.93	1376.04	1867.38	1490.51	1605.26	1515.21	0
ERV25	3903.75	5185.87	5210.13	5635.3	5291.9	5095.49	5530.25	5900.02	4891.27	5264.37	4578.46	3656.05	0
ERV29	1718.02	1181.62	1225.23	1036.51	1474.99	1210.3	1049.76	835.003	882.078	1021.38	917.197	602.912	0
ERV41	1033.1	969.838	783.49	815.291	823.637	761.942	819.005	896.486	629.026	827.649	673.874	453.208	0
ERV46	1121.03	1697.11	1553.81	1881.8	1787.69	1698.39	1850.32	2237.72	1882.99	1991.53	2082.73	1922.27	0
ESA1	1323.45	1504.06	1175.53	1090.85	950.77	798.695	812.009	979.656	892.901	823.187	800.329	868.628	0
ESBP6	906.516	1302.59	558.386	963.707	826.919	749.227	778.828	909.18	659.978	460.313	353.776	367.944	0
ESC1	202.832	302.788	419.568	324.868	324.16	262.579	277.638	327.05	279.906	288.674	267.3	420.621	0
ESC2	125.486	115.626	59.0724	69.1484	86.9529	91.7828	100.134	71.665	91.5548	73.6544	82.8152	58.8055	0
ESC8	24.8393	35.3084	35.8587	37.5355	47.9833	40.1574	49.0379	37.8133	32.6889	33.9135	49.1958	34.07	0
ESP1	91.6912	57.6923	99.5905	102.843	94.1513	101.81	88.9292	74.7682	88.8047	134.51	108.033	98.1402	0
ESS1	528.874	1017.49	495.916	853.015	1284.37	1019.46	1156.56	1416.92	935.549	956.176	1398.98	1209.27	0
EST1	51.747	36.9788	73.1782	79.2842	79.746	71.0622	75.9972	64.5686	82.1123	87.1846	81.2684	70.5551	5
EST2	30.9512	20.0766	21.8279	26.2728	26.3744	25.9132	20.1363	13.1359	14.0019	13.8761	14.6119	11.4061	3
EST3	1119.21	681.584	640.421	739.859	506.735	1001.73	928.912	852.101	1032.21	922.259	945.038	684.657	0
ETR1	449.024	712.615	390.268	439.536	681.248	313.773	331.412	276.017	145.545	149.675	86.5004	52.2681	0
EUG1	232.493	355.868	343.563	285.521	259.982	279.757	280.845	264.717	261.695	289.772	262.198	374.496	0
EXG1	2021.93	1298.01	2011.45	2139.8	2458.84	1632.02	1729.29	1693.41	1533.33	1630.57	2158.32	2131.06	0
EXG2	54.9471	98.0108	88.7076	78.2334	89.5343	112.467	106.859	96.8052	108.141	145.603	155.316	159.685	0
EXO1	434.987	410.96	384.3	398.484	283.068	383.404	431.372	604.237	430.679	435.395	458.401	404.49	0
EXO70	40.488	30.7008	83.7763	67.9061	68.376	58.9383	62.9595	65.1725	42.841	63.2315	54.3016	52.4973	0
EXO84	52.1426	79.1013	80.7733	100.168	91.7158	64.3229	73.248	55.8618	41.0342	82.4142	55.1628	49.1107	0
FAA1	1186.51	1657.51	1532.6	1727.51	2041.51	1246.52	1489.11	643.951	1200.65	1423.2	1015.89	667.724	0
FAA2	380.683	721.91	284.402	299.201	529.075	323.892	323.318	307.888	225.178	70.2456	67.8291	50.8724	0
FAA3	231.148	174.845	354.911	345.77	323.167	359.154	388.801	265.329	318.81	265.338	396.786	381.416	0
FAA4	2242.63	3143.04	1988.32	2299.27	2678.95	1888.75	1785.04	1920.77	1840.97	722.516	1049.31	1325.1	0
FAB1	86.4585	123.284	86.2394	87.6322	126.855	67.2257	101.95	60.1382	74.4926	81.4266	76.1434	65.5977	0
FAD1	363.311	413.557	362.761	335.572	344.614	382.297	370.278	381.395	368.809	346.902	301.608	354.85	0
FAL1	142.48	135.175	134.748	133.446	91.1573	168.682	154.755	153.917	233.358	76.1357	189.714	181.532	0
FAP1	319.922	443.435	250.118	288.427	312.893	337.961	373.248	401.313	295.575	215.281	319.839	360.489	0
FAP7	529.206	442.906	674.071	537.048	389.047	502.813	732.327	577.207	918	710.221	558.881	627.621	0
FAR1	298.706	87.5463	192.247	238.907	230.22	189.814	233.116	202.317	237.402	315.98	580.034	607.098	0
FAR10	206.594	125.913	216.555	163.611	167.317	151.658	190.057	218.722	172.081	198.471	220.924	315.066	0
FAR11	168.111	202.965	160.199	149.116	157.729	155.577	173.235	186.281	119.762	182.712	156.823	119.358	0
FAR3	23.197	26.2883	34.1548	31.0767	25.7005	21.2154	17.6747	14.608	13.8536	14.7446	16.6429	15.8835	1
FAR7	80.8498	77.5772	58.0614	41.9144	64.7924	48.6559	48.8918	36.634	36.3267	42.6917	19.3819	14.7496	0
FAR8	162.123	210.985	220.452	189.464	218.759	196.629	218.256	173.61	167.04	181.972	134.62	108.139	0
FAS1	5980.51	4801.63	5769.16	5078.36	5328.57	3557.12	3792.17	4275.87	2548.51	3135.29	2919.66	2458.78	0
FAS2	3014.34	4271.32	5438.36	5384.05	5744.07	3980.68	3344.26	3985.23	3707.74	3925.13	4368.77	4311.23	0
FAT1	26.1415	29.5866	53.9836	39.591	59.9832	60.0762	50.0153	58.0529	49.7119	95.9544	96.3067	63.7254	0
FAU1	896.4	601.103	517.347	672.895	509.49	741.275	760.704	770.696	737.875	768.233	725.568	525.138	0
FBA1	5121.57	6506.62	11883.1	10528.8	12799.6	9241.61	8402.73	8063.15	8331.64	8571.56	8882.31	8672.78	0
FBP1	278.128	591.523	819.668	1011.74	1215.18	747.666	859.243	891.644	567.76	146.461	76.6051	50.5353	0
FBP26	602.249	236.331	497.843	578.489	594.036	350.714	369.809	402.921	304.747	563.984	353.563	271.803	0
FCP1	219.761	249.228	235.959	246.446	219.919	248.849	279.217	346.005	225.019	251.429	338.753	429.896	0
FCY1	1639.87	3589.66	3187.37	4255.88	3483.8	3180.27	3504.62	3960.02	4259.5	3814.04	4082.99	3434.93	0
FCY2	1340.2	1235.2	1750.03	1470.09	1335.19	1707.38	1523.63	1344.93	1716.42	1614.7	1832.15	1891.26	0
FCY21	166.896	104.114	96.665	155.25	124.981	132.857	136.811	154.216	123.341	154.941	165.606	141.993	1
FCY22	39.0143	31.2613	28.4501	46.1799	32.9161	49.794	39.9082	46.5256	43.6508	63.1992	49.7539	41.3974	12
FDH1	2599.14	5926.45	3036.68	4180.72	4700.76	1354.82	1963.39	1601.59	653.719	26.2803	24.9258	26.1763	2
FDH2	883.222	2283.09	428.484	988.667	1832.67	488.299	892.759	613.115	227.806	21.3035	19.2792	19.6636	3
FEN1	1146.2	1129.35	1241.72	1141.68	1201.77	1568.89	1733.29	1696.04	1679.69	1385.08	1786.56	1841.65	0
FEN2	116.097	128.868	52.1154	64.4379	84.1546	101.264	110.169	102.513	85.1699	83.0635	91.9145	48.1733	0
FES1	5945.41	4218.2	2597.81	2500.04	2211.8	2118.63	2435.12	2276.82	2544.41	1976.99	1603.69	1533.43	0
FET3	968.884	587.525	947.886	1224.54	1853.81	586.621	530.236	705.873	1607.1	1922.95	2135.45	2210.91	0
FET4	81.2015	47.3748	30.9767	45.2034	35.4258	42.1577	59.0365	57.728	41.9765	67.5396	126.633	82.4576	0
FET5	1070.8	1217.18	868.173	1027.27	762.769	833.055	851.515	828.808	957.511	884.01	851.901	1029.96	0
FHL1	175.144	242.923	120.732	180.852	181.358	172.759	166.749	201.217	154.187	173.238	197.561	131.233	0
FIG1	93.0499	49.876	42.8328	34.9658	27.7273	44.3684	36.1587	57.2462	36.4983	30.5898	26.1551	25.5084	4
FIG2	58.9132	76.2976	56.2419	77.9754	56.1948	49.1376	46.8432	57.9564	70.112	45.5499	49.8871	83.4548	3
FIG4	319.135	275.691	323.355	276.147	286.45	245.708	258.951	254.893	220.756	227.093	191.496	199.44	0
FIN1	216.888	246.105	173.089	181.08	173.305	176.458	174.721	182.454	159.17	181.972	130.572	121.492	0
FIP1	378.049	423.387	313.162	349.708	211.95	262.544	328.97	476.46	374.568	317.98	334.276	458.736	0
FIR1	110.27	96.4021	270.026	258.233	257.636	156.447	211.624	120.477	155.907	261.832	320.026	620.518	1
FIS1	1258.96	2427.27	2139.98	2454.72	2724.9	1931.19	1873.42	1210.5	2031.62	2378.35	2344.94	2126.4	0
FIT1	97.1207	92.4385	64.4081	77.5431	76.6858	52.8553	53.7382	55.3435	62.9705	111.58	88.0201	89.3228	1
FIT2	3132.97	2103.12	3324.96	4051.08	4771.14	360.618	447.71	486.142	1932.2	3968.2	5659.42	5382.48	0
FIT3	5272.02	3674.26	5106.58	5963.4	8521.18	1578.03	1600.27	1730.5	5317.81	6907.99	7913.3	5768.42	0
FKH1	396.099	244.625	277.161	349.294	340.553	357.75	368.421	329.95	305.988	306.079	402.212	300.736	0
FKH2	307.541	319.542	315.575	327.989	319.281	241.893	279.76	243.392	263.58	315.798	494.506	588.192	0
FKS1	2220.86	2513.43	2407.13	2587.61	3253.14	3319.92	3525.64	4033.17	2822.49	3657	3765.58	3243.17	0
FKS3	267.177	246.832	218.787	200.743	254.486	131.463	132.406	166.011	107.935	120.693	127.434	90.4742	3
FLO1	31.2912	29.1102	29.4777	27.1656	37.5156	32.7824	34.3874	48.9228	21.7478	28.5788	34.276	25.2919	6
FLO10	133.882	97.2542	97.7825	109.185	83.1667	61.9558	58.3334	61.7165	71.9687	68.1309	57.1664	87.9817	0
FLO8	12.6293	11.8858	5.165	5.4493	5.2937	5.0985	6.2347	4.9831	7.7731	5.4657	6.1742	3.6275	11
FLO9	1532.88	366.663	89.9508	1272.52	1048.23	689.024	462.204	880.986	871.023	1016.93	917.701	921.085	0
FLR1	583.16	792.678	512.317	693.797	748.065	742.993	718.324	864.041	548.937	550.353	519.868	538.031	0
FLX1	438.822	369.797	335.612	378.266	328.726	364.327	368.729	351.391	480.119	536.213	547.217	480.279	0
FMC1	352.493	163.893	217.308	224.767	243.799	393.596	373.169	261.418	548.143	558.943	540.411	629.979	0
FMN1	1415	1062.07	678.073	638.747	663.203	653.014	784.652	863.389	667.942	609.22	625.203	404.02	0
FMO	380.422	280.652	175.405	244.641	257.948	328.868	385.67	353.9	444.893	454.806	536.043	342.611	0
FMS1	248.708	196.493	138.881	200.59	175.554	174.036	180.978	227.563	136.27	144.335	127.246	109.589	0
FMT1	25.1406	45.7206	33.6434	38.9259	33.9053	37.5615	32.9756	41.616	28.5454	52.6099	46.5391	32.5759	7
FOB1	189.755	167.431	119.984	145.343	119.286	151.197	174.857	149.722	203.5	123.05	157.422	122.005	0
FOL1	469.38	321.435	323.331	300.683	299.632	505.529	553.77	487.528	507.679	539.313	825.438	686.591	0
FOL2	1417.47	997.614	1490	1386.12	1228.88	1309.01	1210.87	1079.7	1517.52	1466.25	1281.16	1194.4	0
FOL3	410.457	290.811	338.51	400.413	281.537	291.032	356.395	336.222	321.241	311.009	313.168	268.114	0
FOX2	3239.91	2692.52	2932.16	3186.35	3876.08	1713.45	1948.09	2144.99	1333.65	421.06	259.511	248.992	0
FPR1	7473.81	8326.78	7962.56	8628.37	8516.33	8311.87	9510.84	7102.39	8745.47	7124.94	7166.35	5104.16	0
FPR2	2478.56	2205.41	1834.4	1856.67	1252.56	2195.5	2474.79	2136.22	2543.47	1956.11	1906.88	1215.11	0
FPR3	599.608	564.912	687.535	685.675	803.855	734.02	992.241	913.45	1003.59	999.594	1281.73	1662.52	0
FPR4	674.213	905.197	1491.5	1385.18	1025.28	1137.37	1226.15	1454.57	1572.17	1621.79	1532.29	2237.6	0
FPS1	813.725	830.353	1102.43	851.01	706.314	921.59	904.255	1167.5	794.654	847.542	857.93	1232.45	0
FRE1	105.034	61.5652	149.681	143.856	189.495	170.363	177.851	208.393	142.534	190.366	206.045	93.4784	0
FRE2	80.0669	60.6699	56.2152	84.9153	77.9747	61.9125	70.0085	76.105	63.7406	125.47	138.74	58.3622	3
FRE3	170.799	164.995	81.9871	103.511	83.4495	71.6177	87.9132	81.569	109.67	214.604	275.302	138.963	0
FRE4	81.7872	237.246	79.7976	123.914	95.7673	111.462	109.695	116.537	64.8782	38.2439	38.9576	43.3286	0
FRE5	14.3987	10.8618	12.1502	19.6011	38.7567	5.7713	3.9355	5.3709	15.8095	39.9838	47.9773	20.5429	2
FRE6	368.072	330.029	243.796	396.144	365.766	221.467	250.682	279.116	286.545	398.602	519.063	414.097	0
FRE7	49.2924	69.6845	74.3741	60.0034	51.782	132.948	141.594	192.012	144.988	49.5934	42.2914	87.2578	1
FRM2	69.9185	58.4539	41.5699	54.5864	45.7206	68.1423	73.2701	77.2992	75.8404	53.0089	52.6848	51.3865	1
FRQ1	2556.81	2261.81	2226.72	2281.99	1798.79	1783.44	1800.82	1735.59	1974.22	1935.66	1258.95	1412.2	0
FRS1	3144.79	3589.61	4192.87	4797.07	3821.96	5105.35	5291.63	5825.62	5423.65	5903.68	5402.73	5547.31	0
FRS2	1193.26	900.26	822.639	891.05	819.932	1054.28	1221.37	1168.66	1174.42	1377.33	1870.09	2067.01	0
FSH1	966.055	318.482	325.698	385.435	276.944	591.834	647.464	656.976	819.911	1647.38	2230.92	1361.33	0
FSH2	230.447	479.481	380.594	587.098	581.969	516.823	545.69	693.306	599.831	665.094	812.987	596.608	0
FSH3	356.618	308.555	388.699	334.599	292.135	330.667	373.615	339.572	418.696	314.057	316.894	246.347	0
FSP2	310.143	129.901	244.145	304.524	513.983	287.689	268.544	298.943	248.896	397.388	313.165	182.495	0
FTH1	2601.93	1902.3	1689.39	1403.5	1565.5	1335.43	1380.95	1369.65	1850.39	1455.8	1550.78	1618.37	0
FTR1	5772.18	4235.96	3254.65	3474.15	3129.69	2209.98	2230.24	2851.07	3819.95	2950.83	3696.48	4067.99	0
FUI1	120.837	215.863	262.073	196.909	240.695	174.734	210.428	177.023	181.511	72.701	76.334	86.6179	0
FUM1	2293.57	4022.35	4282.78	5655.37	6081.07	5159.49	5571.9	3191.04	5885.16	5397.31	5349.76	4331.62	0
FUN11	551.236	760.873	1540.03	1064.34	981.457	1178.81	1225.16	1685	1647.38	1208.18	1746.37	1880.69	0
FUN12	798.738	844.374	2866.82	2536.04	2511.93	2505.28	2643.65	2779.14	2251.59	2566.36	3081.16	3689.46	0
FUN14	542.55	408.311	876.269	614.033	826.016	610.893	617.319	577.572	315.37	523.401	382.202	367.686	0
FUN19	449.3	210.377	441.295	711.714	731.222	333.606	333.526	295.619	66.0952	551.613	296.159	370.86	1
FUN21	569.322	129.978	433.343	531.704	426.539	384.641	331.969	464.892	516.742	562.527	537.518	714.754	0
FUN26	520.361	489.868	391.677	508.814	801.085	587.639	602.222	839.329	527.687	514.925	610.861	381.323	0
FUN30	106.64	89.7681	219.598	169.606	178.431	143.297	177.954	219.217	136.947	236.17	268.818	266.639	0
FUN34	6224.2	5515.52	4568.36	4627.77	5618.12	4851.69	5491.4	5046.75	4008.88	1478.82	689.959	727.553	0
FUR1	816.356	1213.4	958.085	1153.6	1229.73	1607.79	1758.71	1186.41	1723.58	1917.92	2375.8	2521.46	0
FUR4	563.446	589.315	408.663	507.752	479.6	421.23	516.089	421.198	506.81	664.875	793.01	526.503	0
FUS1	256.053	322.021	263.261	349.795	237.517	173.507	186.818	207.371	226.634	321.582	294.657	299.949	0
FUS2	446.384	189.108	139.031	105.679	98.7233	141.216	170.512	165.259	180.89	92.5138	80.9841	97.1774	0
FUS3	368.689	398.59	217.114	501.387	472.151	458.643	537.999	239.384	489.59	354.472	542.033	367.226	0
FYV1	37.1375	39.4251	37.8091	49.1528	37.6429	44.9347	41.1105	50.5669	48.4562	66.1008	67.0583	71.6856	11
FYV10	1109.57	757.135	676.681	669.8	542.019	339.795	327.481	327.178	214.683	540.948	257.073	242.19	0
FYV12	11.0357	22.0191	18.6145	21.8597	15.6027	19.7093	17.4891	22.7741	18.2327	21.6561	22.3224	23.6362	12
FYV4	766.877	454.966	536.747	608.872	590.478	844.299	796.098	796.716	956.483	783.814	945.714	891.033	0
FYV5	152.491	252.131	200.452	108.835	64.5869	96.0158	124.985	230.444	167.046	126.59	104.465	157.908	6
FYV6	783.075	548.271	898.908	678.183	495.081	367.532	501.403	275.543	454.448	438.655	471.549	551.971	0
FYV7	279.505	124.699	188.517	197.905	119.044	153.789	198.375	182.586	287.65	151.816	284.374	433.962	0
FYV8	389.578	411.436	324.392	395.311	343.295	249.164	260.021	241.224	251.261	232.91	200.628	199.721	0
FZF1	206.207	133.731	81.8089	97.803	119.183	128.896	141.282	150.078	141.46	118.165	179.066	119.841	2
FZO1	455.029	535.703	563.792	483.366	514.877	581.887	516.548	615.343	545.881	567.478	559.802	520.7	0
GAA1	269.77	348.218	727.885	629.403	544.021	369.109	381.259	397.986	277.831	445.947	470.437	255.5	0
GAC1	395.724	380.7	155.465	201.263	210.095	102.595	149.996	139.529	89.8947	350.314	102.679	108.239	0
GAD1	621.781	993.518	577.795	611.209	906.928	360.383	362.276	508.004	129.111	392.766	89.4365	95.8527	0
GAL1	50.3363	55.8918	37.1153	60.4228	50.1135	37.4141	39.6041	22.6499	36.2316	41.1521	29.0628	34.6374	2
GAL10	113.044	88.7626	105.364	90.6685	67.3678	134.162	111.21	55.8748	159.043	79.8883	79.7788	97.4026	2
GAL11	932.426	1036.43	693.272	769.798	766.942	563.476	579.378	726.031	538.993	586.354	652.615	794.938	0
GAL2	56.0702	59.4913	55.12	52.6075	46.5812	62.3569	60.8536	84.3801	63.0377	63.7595	61.3438	50.3936	4
GAL3	97.5833	124.561	100.419	154.006	134.366	110.231	123.889	73.4352	124.377	132.772	104.059	92.4465	0
GAL4	459.867	305.077	130.502	162.729	140.219	157.799	158.074	292.841	235.821	194.014	217.16	219.599	0
GAL7	73.8456	64.2584	63.7761	69.8824	54.5984	53.3709	40.7969	72.9502	64.3556	54.2258	53.3118	53.952	7
GAL80	166.004	175.481	336.348	238.945	392.018	260.002	302.312	254.174	224.01	282.541	341.03	381.652	0
GAL83	160.587	127.809	157.317	171.205	245.839	213.665	208.197	169.045	201.962	260.755	274.12	261.099	0
GAP1	2090.29	1001.23	1053.51	1487.11	1827.85	1421.52	1664.14	1773.16	392.127	836.869	721.661	566.072	0
GAR1	5362.97	2651.32	4586.56	4218.33	2617.65	4105.54	4329.04	4067.29	4984.93	4664.19	4705.45	5196.8	0
GAS1	4294.29	4412.05	6105.94	6507.88	5959.23	6717.54	7781.91	8267.82	7234.09	6593.43	7681.6	8112.58	0
GAS3	480.527	348.022	936.87	805.885	923.596	698.67	693.46	959.192	789.641	890.406	870.319	1055.69	0
GAS4	294.277	343.749	120.198	177.675	131.459	157.775	146.65	214.642	205.08	129.543	101.542	120.649	0
GAS5	1812.3	1914.41	2124.82	3039.92	2650.15	2453.91	2774.16	3014.37	3122.3	2620.28	2994.04	3064.97	0
GAT1	850.868	518.356	379.232	630.494	460.151	498.086	678.247	636.665	470.316	572.064	861.186	1357.43	0
GAT2	496.41	445.58	414.538	668.911	472.645	413.728	394.245	314.503	349.902	695.913	589.449	642.875	0
GAT3	19.4504	15.8877	17.3553	13.9838	9.4017	16.6335	15.951	21.1852	17.3655	17.4763	16.3975	17.0181	12
GAT4	63.1228	36.7994	30.6488	37.0627	25.4489	31.3421	32.6494	36.5837	45.343	38.1701	43.259	40.8918	12
GBP2	977.092	1368.73	1051.05	1100.11	1125.77	1041.25	918.127	919.482	1304.84	1323.9	1070.74	1036.61	0
GCD1	1055.76	1306.28	794.208	1072.38	1229.63	1172.61	1449.95	1348.97	1280.84	1432.94	1953.93	1604.86	0
GCD10	557.051	544.546	437.884	557.808	401.111	682.565	779.559	946.123	778.795	499.329	706.023	603.857	0
GCD11	2624.68	3058.73	1906.23	2043.63	2274.73	2674.71	2903.14	2589.87	2399.19	2671.19	2292.27	2030.15	0
GCD14	363.132	138.533	407.126	347.595	327.84	412.791	468.643	490.41	485.742	348.456	573.851	671.58	0
GCD2	165.334	151.644	170.955	147.676	152.107	145.923	161.236	164.521	167.614	165.404	187.749	238.457	0
GCD6	210	241.521	201.377	163.659	207.29	250.327	274.469	215.933	266.038	231.308	223.392	195.914	0
GCD7	255.466	391.932	451.532	470.236	571.736	571.874	609.607	643.372	569.606	655.65	932.48	973.902	0
GCN1	776.656	1104.53	757.448	973.157	1010.28	924.683	941.029	1084.05	802.116	1398.96	1348.06	1113.12	0
GCN2	163.867	208.052	154.125	172.458	230.946	152.432	143.546	140.137	114.524	193.757	162.938	116.206	0
GCN20	340.66	301.532	443.845	466.363	408.878	483.701	518.255	414.246	470.385	568.192	705.953	530.914	0
GCN3	424.315	352.814	520.415	542.474	374.231	569.757	669.677	638.793	587.888	601.573	706.759	709.559	0
GCN4	11445.3	10683.5	9150.22	8449.74	8832.42	8399.6	8326.98	8280.68	8472.61	6605.82	6728.17	7111.02	0
GCN5	295.663	168.039	217.605	234.938	303.989	334.233	328.772	232.685	275.786	307.946	403.541	256.94	0
GCR1	434.171	557.534	393.43	376.442	426.795	302.269	278.525	288.944	221.633	348.692	321.61	378.148	0
GCR2	333.292	315.753	221.871	233.347	225.094	245.784	243.811	262.286	218.16	235.619	209.921	208.246	0
GCS1	479.937	745.965	272.133	453.829	378.327	449.057	516.102	628.255	532.742	461.845	507.467	474.311	0
GCV1	1391.15	1889.27	2156.42	2295.8	2081.02	1938.1	2097.87	1907.51	2226.24	1841.92	1904.78	2006.83	0
GCV2	318.98	975.649	2001.77	2107.53	1875.44	1835.99	2067.86	2211.67	2138.99	1699.8	1906.26	2790.85	0
GCV3	5874.08	6859.53	7495.38	8668.73	8482.49	7612.96	8139.47	9419.74	8027.74	8740.44	8768.42	5141.01	0
GCY1	2627.65	2700.25	3092.29	3404.2	3303.4	1751.06	1839.65	1895.6	1371.72	1003.39	476.798	371.427	0
GDA1	935.591	779.512	1054.6	903.035	918.573	988.798	1020.08	949.141	945.988	1005.21	1147.49	1227.71	0
GDB1	573.858	730.957	543.478	397.387	987.051	452.321	447.996	518.141	399.484	585.588	231.969	206.592	0
GDH1	3924.75	3976.12	6441.64	6126.98	7159.09	6892.27	6972.23	6641.83	5564.13	6306.16	7032.55	6336.16	0
GDH2	1135.23	1564.38	1391.88	1846.68	2078.22	1078.92	1104.78	842.308	1021.49	392.059	230.806	131.848	0
GDH3	1677.54	333.493	812.393	1032.12	1200.36	819.748	721.796	938.74	723.003	378.379	389.998	399.152	0
GDI1	4421.81	3086.49	2729.1	2879.61	2566.21	2693.52	2995.72	2807.24	2660.27	1959.81	1570.19	1248.75	0
GDS1	3599.64	3547.35	2579.64	2727.56	3796.54	3226.62	3258.48	3972.35	2862.06	3564.33	3062.29	3209.04	0
GEA1	178.066	162.506	190.13	213.105	268.241	232.252	234.526	298.131	187.67	247.196	321.936	160.326	0
GEA2	77.3143	84.067	96.2233	93.9193	94.6279	104.353	98.4904	82.0117	85.5744	112.859	112.306	134.959	1
GEF1	58.5701	35.7401	210.461	209.386	187.865	160.48	127.505	88.8505	128.759	173.454	142.893	174.76	1
GFA1	482.857	465.189	400.5	581.804	943.505	611.951	642.227	618.292	380.155	500.094	565.318	348.737	0
GFD1	225.197	217.561	297.082	284.218	312.178	163.949	219.847	117.433	192.14	215.046	219.363	199.653	0
GGA1	394.206	489.385	414.838	436.393	444.553	299.991	318.333	316.796	164.69	488.722	162.241	134.818	0
GGA2	1063.31	1214.87	695.744	934.021	920.067	1044.24	1088.23	1095.84	1286.22	1517.77	1712.41	1593.22	0
GIC1	87.9237	58.2452	84.9727	98.9797	107.324	122.873	138.727	105.171	153.892	79.0455	136.099	202.27	1
GIC2	1128.79	533.072	561.981	545.775	477.701	673.699	806.957	1043.69	1068.71	885.239	1143.96	1800.24	0
GID7	132.018	207.515	147.066	175.84	186.533	114.351	123.917	131.307	85.5712	110.165	107.093	116.66	0
GID8	272.507	344.941	418.847	423.792	431.134	139.108	151.543	125.231	170.606	210.628	137.574	121.055	0
GIM3	743.761	862.434	1118.31	1177.31	942.889	1483.08	1576.21	1590.85	1683.36	1109.03	1471.72	1521.53	0
GIM4	920.891	517.951	1122.74	629.943	709.774	959.533	833.579	713.584	967.161	911.175	1069.47	1309.82	0
GIM5	722.255	816.196	1039.33	941.997	862.095	949.81	867.194	1265.2	966.006	786.301	984.178	773.022	0
GIN4	97.665	100.841	130.492	128.05	171.075	141.933	157.429	107.681	153.233	142.324	163.666	152.496	0
GIP1	48.351	70.9436	77.0922	72.7041	87.0613	52.8757	55.3095	46.3273	37.6716	46.276	38.1118	32.3542	3
GIP2	1137.22	1070.61	691.232	463.521	494.394	111.797	124.994	129.92	68.0228	262.825	48.3646	60.9617	0
GIR2	765.243	674.376	727.15	691.977	437.132	669.853	750.064	622.342	997.223	589.345	734.058	941.202	0
GIS1	44.4837	60.0642	55.886	45.9164	74.4134	49.2532	45.6596	36.0446	35.064	86.8814	56.5256	58.5068	0
GIS2	2087.24	2474.33	2763.81	2212.9	2184.5	2684.49	3048.31	2968.25	2877.9	2370.05	2696.17	2598.08	0
GIS3	135.862	158.818	95.5599	171.986	133.532	152.526	155.565	192.221	145.928	155.828	151.207	265.585	0
GIS4	457.935	440.829	642.129	562.088	444.855	538.945	622.883	639.844	510.927	443.549	489.123	526.096	0
GIT1	75.0548	82.8177	41.4544	48.1551	42.1742	48.1909	49.2771	40.2721	48.8944	39.1562	32.3779	33.013	2
GLC3	4132.05	3479.25	2804.44	2722.99	2703.36	1473.66	1513.71	1702.69	695.28	3336.01	639.161	594.442	0
GLC7	2000.85	1784.27	1701.3	1249.77	1384.12	1364.94	1325.78	1017.08	1633.86	1700.1	1195.14	1130.23	0
GLC8	978.323	1304.09	962.784	853.507	1123.96	675.852	713.773	769.73	685.32	714.29	709.143	812.365	0
GLE1	178.508	231.084	186.594	276.866	221.542	185.735	204.815	198.497	214.431	160.093	246.926	295.631	0
GLE2	549.152	448.371	419.01	428.531	402.646	467.102	496.339	438.762	429.179	338.079	359.897	355.624	0
GLG1	305.933	460.203	293.021	384.237	341.444	234.941	240.328	269.232	176.503	390.522	203.958	239.797	0
GLG2	165.085	199.225	154.671	219.925	249.094	163.007	186.456	220.314	143.58	143.991	172.348	184.443	0
GLK1	8435.42	9486.97	7337.89	9267.78	9797.88	6565.59	6768.65	7334.64	6304.15	7117.74	3965.79	3986.03	0
GLN1	2662.38	4019.76	5174.59	5347.06	5030.33	4754.23	4877.66	2389.27	4593.94	5027.1	4865.32	4013.16	0
GLN3	111.934	148.37	154.936	145.742	145.347	121.029	127.382	140.498	103.963	96.2877	138.553	140.049	0
GLN4	349.018	423.279	379.4	383.909	325.177	497.512	562.451	421.629	529.835	693.17	543.701	487.08	0
GLO1	2567.56	2647.1	2617.34	2986.8	3219.47	2601.77	2388.73	2571.21	1701.86	1899.91	1281.44	975.13	0
GLO2	301.092	557.016	507.431	517.414	694.05	475.392	428.355	237.589	404.339	405.228	313.74	243.591	0
GLO3	1339.12	1055.02	872.847	1087.36	1160.14	1184.65	1253.94	912.128	1197.9	1026.19	981.041	947.558	0
GLO4	305.041	879.051	523.02	509.853	481.035	341.547	333.028	319.584	287.115	164.968	130.695	131.847	0
GLR1	1501.48	2097.62	1581.05	1910.2	1703.67	1789.95	1848.12	1866.84	1845.94	2059.8	1709.88	1473.63	0
GLT1	3052.07	3433.7	2907.68	3336.7	3122.29	2459.72	2817.65	2859.23	2276.34	2188.77	1996.41	2550.55	0
GLY1	1919.35	3574.9	821.205	1547.31	2115.61	1550.03	1904.85	2006.99	1112	618.584	914.033	677.511	0
GMH1	431.171	600.848	455.15	490.958	662.245	758.464	726.365	752.259	599.372	642.391	512.155	410.928	0
GNA1	680.361	756.772	1122.97	1360.46	992.471	1090.78	952.335	500	1255.13	1327.01	1261.22	1104.37	0
GND1	6952.21	4474.11	6181.23	5874.07	6332.05	5838.5	6499.25	5441.63	5989.38	5938.7	6887.24	6895.35	0
GND2	2843.47	3040.62	1959.58	3400.19	3692.22	1113.82	1169.22	1070.17	272.701	283.538	232.008	268.673	0
GNP1	861.505	907.919	274.649	298.527	206.614	236.427	268.481	274.202	294.817	500.895	361.01	597.621	0
GNT1	539.938	786.227	542.444	612.802	647.548	543.481	675.439	504.892	460.496	505.147	407.701	307.374	0
GOD1	111.668	113.425	91.1006	107.31	98.3758	101.793	83.5925	102.556	113.19	90.4239	87.3989	101.927	0
GON7	1275.98	573.045	1245.92	1197.9	1055.1	1123.78	1222.41	1871.64	1476.9	1367.61	1901.85	1512.53	0
GOS1	2041.11	2833.2	1554.79	2565.27	1814.69	1321.22	1499.76	1541.49	1474	1689.17	1667.15	1950.67	0
GOT1	2458.71	2727.28	2627.57	2675.55	2362.37	2385.11	2681.3	3217.34	2621.68	2873.73	2632.85	2738.56	0
GPA1	2552.51	2044.42	1680.16	1399.23	869.261	941.757	878.978	1055.85	1299.6	948.308	950.77	1219.8	0
GPA2	2064.74	2348.25	1975.02	1820.92	1513.82	1191.73	1385.27	1716.69	934.998	1253.99	983.887	1482.46	0
GPB1	83.1611	173.064	57.56	121.237	54.3007	126.959	143.036	154.238	104.181	59.9779	67.6458	79.1548	0
GPB2	92.8408	52.9516	97.8074	120.224	163.552	92.4452	85.931	123.64	70.3835	88.5322	97.4353	64.4285	2
GPD1	2432.78	4259.14	2285.12	3680.52	3817.34	1994.68	2286.62	1871.42	867.186	3516.55	1324.93	1530.16	0
GPD2	253.572	487.987	238.751	314.653	328.702	210.886	208.366	241.544	208.742	197	348.356	207.418	0
GPG1	8958.44	8574.15	5050.51	5106.8	5003.16	2917.94	3268.29	3483.19	1341.26	885.438	529.862	365.749	0
GPH1	212.302	604.079	760.505	603.575	993.144	419.013	335.953	455.888	430.95	1343.83	395.55	274.924	0
GPI1	577.173	529.986	328.584	298.828	444.85	365.094	440.601	366.568	342.555	269.211	366.801	263.7	0
GPI10	94.327	104.173	174.026	165.995	118.722	106.143	118.751	52.1789	119.9	123.107	99.0394	114.369	0
GPI11	1218.98	906.85	1234.02	1013.05	704.125	1106.73	1109.28	1223.52	1505.39	1293.06	1242.04	1261.23	0
GPI12	160.336	199.453	224.521	267.815	198.603	220.504	227.925	239.41	221.826	288.829	198.233	259.835	0
GPI13	543.716	549.726	743.778	806.064	1071.1	522.695	617.964	540.993	608.652	740.455	839.214	756.423	0
GPI15	124.158	127.421	249.994	145.187	128.404	156.824	252.062	177.55	273.025	224.464	153.417	146.151	0
GPI16	310.065	452.293	328.856	373.203	564.26	383.54	328.494	263.425	260.726	360.064	413.946	473.691	0
GPI17	323.615	498.021	448.813	640.235	652.526	418.211	446.128	225.171	346.835	449.724	302.785	308.531	0
GPI2	195.005	294.733	282.13	243.964	239.314	258.496	184.678	302.772	265.094	46.4191	318.549	324.836	0
GPI8	918.992	574.032	685.667	565.291	485.892	606.091	660.448	635.537	772.265	483.68	704.529	862.428	0
GPM1	12163.7	12193	12220.3	11979.4	12910.8	11666.6	11787.5	12407.2	9120.81	10784.6	10889.1	10610.6	0
GPM2	60.2611	880.393	413.782	399.754	494.94	236.366	255.378	244.5	217.452	182.945	90.9658	89.4861	0
GPM3	411.133	293.181	238.269	223.236	172.071	282.912	337.23	363.67	431.822	343.087	299.845	294.462	0
GPR1	291.577	359.962	425.974	373.946	376.382	369.521	359.336	316.312	243.842	312.76	276.046	301.777	0
GPT2	228.969	537.066	1184	888.321	1212.99	735.756	658.163	829.067	639.498	584.533	500.903	466.194	0
GPX1	3655.52	2270.31	2802.58	2474.09	2814.49	1417.93	1511.81	1727.1	839.884	1102.72	324.819	231.775	0
GPX2	49.8698	54.7189	93.7361	64.3482	74.0177	63.8912	57.5382	30.5651	50.0673	60.7461	56.3522	55.3396	0
GRC3	236.451	259.682	329.763	296.83	229.518	308.881	334.559	503.563	356.429	227.219	348.516	401.084	1
GRD19	1067.87	859.442	1045.63	932.666	809.366	879.349	884.182	975.733	932.028	1261.7	936.718	1100.11	0
GRE1	12108.1	9994.4	7103.25	7245.12	8744.76	3813.99	4074.82	3704.04	84.6883	119.392	154.372	123.113	0
GRE2	1335.4	2708.49	1898.07	2174.96	2175.9	1126.23	1211.78	1526.56	354.567	557.543	521.183	444.397	0
GRE3	2120.76	1593.19	1180.36	1454.93	1738.42	1064.52	1049.3	1108.74	822.73	1073.79	518.008	451.173	0
GRR1	236.093	237.565	400.545	333.52	291.716	304.944	328.869	423.406	253.535	287.98	348.826	266.121	0
GRS1	2324.89	2908.33	2827.07	3101.08	3111.78	3030.1	3241.22	2869.91	3120.67	3803.99	3761.71	3428.37	0
GRS2	408.392	468.849	313.593	314.348	305.047	221.12	229.965	274.492	205.151	227.058	182.827	219.995	0
GRX1	4749.75	4643.94	5659.69	4630.45	4326.77	4630.28	3576.13	4801.15	4269.27	4236.61	3526.27	3221.49	0
GRX3	1749.72	1808.9	1177.08	996.291	818.612	1459.91	1530.05	1858.2	1921.69	1689.27	1257.96	1261.29	0
GRX4	1437.07	1583.39	780.158	875.786	946.987	1404.05	1339.19	1383.11	1255.35	795.116	721.341	570.907	0
GRX5	1345.57	1444.26	2068.49	2361.3	1972.3	1565.85	1614.74	1441.35	1881.77	2003.19	1825.98	1456.55	0
GSC2	4962.53	3410.77	3682.66	4691.6	4334.15	2284.15	2363.46	2668.77	1247.24	1296.3	834.282	892.734	0
GSF2	2357.64	2868.31	1609.44	2482.2	2834.09	2328.56	2657.27	2663.14	2081.4	2026.7	1818.62	1708.83	0
GSG1	61.6136	50.2607	88.7107	107.336	93.2287	85.1739	77.1019	59.0266	75.6739	73.3529	84.619	81.0268	0
GSH1	465.931	651.419	476.604	436.943	704.238	716.769	809.335	812.748	346.849	684.681	636.8	721.673	0
GSH2	366.023	438.353	625.351	512.819	747.863	906.166	803.281	709.733	706.221	821.812	771.33	565.512	0
GSP1	1155.43	1106.24	2597.53	2476.48	3295.35	2482.8	2575.75	1806.03	2771.75	3761.68	4316.9	5026.14	0
GSP2	1610.09	1805.25	1487.53	2077.23	1372.72	964.946	1121	1243.07	627.755	485.853	344.947	326.917	0
GSY1	152.498	306.127	347.971	477.151	369.842	283.179	323.067	112.199	259.057	2497.77	505.835	366.647	0
GSY2	306.242	445.934	559.871	699.379	873.74	404.283	393.087	446.816	234.016	602.569	227.213	200.143	1
GTR1	880.31	1359.92	1038.9	1020.93	1128.62	933.52	970.933	1114.13	644.822	694.28	800.426	618.512	0
GTR2	156.263	122.083	173.877	156.158	118.045	154.481	153.314	121.338	145.103	160.527	164.991	190.182	0
GTS1	779.618	571.758	468.309	557.442	500.159	598.186	521.261	172.932	617.229	658.879	623.529	633.045	0
GTT1	4728.67	4654	4487.86	5721.38	5605.59	3378.73	3385.56	2585.24	1565.53	1412.45	1071.41	1051.14	0
GTT2	456.405	461.125	246.857	440.044	480.49	242.055	228.175	260.708	169.483	245.799	212.708	184.838	0
GTT3	2535.65	2626.71	1779.35	2349.34	2323.68	1902.46	1922.54	2536.89	1793.78	2075.17	1564.83	2113.69	0
GUA1	1685.03	1779.56	2736.78	2561.79	2219.33	3084.21	3169.62	3270.87	3220.77	3091.88	3640.24	3848.22	0
GUF1	81.1277	82.1068	194.151	170.228	138.708	172.926	181.778	159.834	224.464	184.671	203.372	293.92	0
GUK1	2933.29	3785.65	3238.57	3560.31	3330.23	3693.75	3943.45	4080.94	3943.03	4244.15	4521.07	4252.62	0
GUP1	300.19	352.268	261.14	278.666	383.875	360.176	359.061	315.594	313.535	317.788	345.104	249.591	0
GUP2	81.8118	120.527	63.152	74.9937	65.1179	66.3258	63.587	64.7108	70.8754	73.2107	58.8069	56.6884	0
GUT1	1049.47	2259.49	1007.47	2143.61	2112.8	1231.83	1125.85	909.135	1168.67	839.073	843.512	752.11	0
GUT2	5232.94	6169.74	3177.97	4251.07	3910.18	2774.22	2645.5	2908.89	2893.62	2542.04	1761.51	1946.87	0
GWT1	378.848	156.939	669.559	588.996	777.683	421.419	310.404	438.811	481.902	745.686	655.631	671.862	0
GYP1	84.957	139.668	137.532	102.531	117.892	101.424	129.204	110.143	69.8153	137.704	103.158	82.2444	0
GYP5	22.2848	32.6994	32.2458	43.5071	48.1396	33.9802	35.6642	22.5654	19.1316	49.6947	38.7021	41.9209	0
GYP6	94.3379	100.187	75.1009	66.2466	77.208	89.5795	90.7535	139.039	75.303	110.673	90.4901	68.419	0
GYP7	311.115	400.252	333.907	309.375	306.859	315.398	312.742	252.305	194.65	296.285	164.517	172.797	0
GYP8	385.533	363.744	260.964	283.998	218.809	249.184	244.109	217.263	293.177	216.368	220.783	208.94	0
GZF3	226.829	137.16	204.927	190.163	202.153	289.896	276.474	336.392	176.503	199.216	367.831	221.605	0
HAA1	189.167	316.422	179.523	286.725	322.542	200.243	198.904	189.076	194.592	164.293	144.78	134.716	0
HAC1	371.284	584.388	79.7501	216.104	227.998	170.172	357.462	503.207	406.557	377.064	169.951	33.1814	0
HAL1	394.865	261.975	116.81	147.405	157.578	175.761	186.201	142.036	167.841	209.871	174.382	137.412	0
HAL5	52.7425	50.2293	54.9906	58.6859	51.9507	56.648	52.9603	81.1994	43.2949	46.2079	43.8517	42.9158	11
HAL9	276.1	279.785	295.35	243.489	227.795	242.576	351.004	334.574	251.167	173.69	167.921	182.752	0
HAM1	171.239	256.825	517.844	581.662	566.703	835.624	899.777	1064.12	799.475	646.532	740.006	676.267	0
HAP1	349.89	531.968	595.673	857.611	815.605	436.165	481.227	548.762	175.699	174.708	178.464	215.415	0
HAP2	1377.66	1000.44	748.089	908.746	544.083	541.277	638.336	734.124	885.463	829.845	670.84	991.883	4
HAP3	970.446	1235.33	981.294	769.516	847.354	1013.68	928.756	1279.08	1322.39	1061.79	1173.65	1091.22	0
HAP4	543.949	304.029	1142.44	869.964	953.377	1054.95	1153.92	1027.44	780.614	1767.99	1220.54	1503.73	0
HAP5	363.497	492.9	169.896	286.243	263.746	312.838	310.924	404.141	389.697	492.542	413.554	360.706	0
HAS1	555.922	436.552	361.934	430.126	407.686	748.06	940.518	814.635	921.442	765.653	1249.14	885.081	0
HAT1	152.713	232.026	259.716	231.818	224.016	219.576	215.978	222.152	193.752	144.866	142.502	132.945	0
HAT2	620.46	647.06	524.71	598.663	564.46	707.112	684.865	837.3	911.675	1005.6	922.846	865.404	0
HBS1	342.911	488.06	342.751	509.47	478.122	378.647	435.037	479.571	365.044	391.449	410.46	218.471	0
HBT1	1272.84	1497.37	559.902	770.519	1381.8	465.913	452.802	631.256	115.115	82.69	84.8449	89.4451	0
HCA4	478.5	438.451	656.676	557.5	468.35	494.293	614.644	880.767	657.155	486.992	691.818	905.433	0
HCH1	3349.54	2674.77	2013.29	1625.26	2064.76	2433.16	2494.68	2552.14	2194.33	1933.39	2351.28	1634.78	0
HCM1	107.685	178.777	108.984	135.358	149.997	212.064	235.859	295.962	240.42	153.291	282.176	367.303	0
HCR1	1726.12	1836.34	1535.4	2190.28	2266.68	2623.7	2715.55	3291.87	2335.45	2643.06	2964.46	2353.28	0
HCS1	428.857	364.989	451.492	393.496	297.35	368.912	386.802	465.447	360.686	404.47	365.527	415.333	0
HDA1	71.9473	99.2812	98.1172	97.9427	113.188	120.283	148.088	131.996	110.577	122.135	162.822	90.7859	0
HDA2	6.7775	4.6255	7.1742	8.0268	10.7011	10.7286	8.8343	5.7747	7.076	8.777	8.0306	8.3925	0
HDA3	49.8909	82.8905	97.0377	80.3202	69.0277	56.076	58.1167	62.2466	47.9177	47.7301	52.0496	71.1047	0
HEF3	1864.09	2698.48	1197.91	1309.72	1188.38	453.992	490.695	706.156	145.384	119.743	127.587	117.328	1
HEK2	527.355	1000.57	592.849	1062.52	954.377	851.499	984.56	1173.52	970.686	1294.53	1237.48	1573.99	0
HEM1	936.677	1446.7	678.65	705.117	1051.68	1020.04	990.521	1033.96	867.216	476.562	673.55	1013.06	0
HEM12	123.688	747.885	1375.49	1729.65	1331.03	1475.67	1522.73	1113.25	1456.07	1484.24	1124.31	1434.29	0
HEM13	293.712	395.532	546.095	859.757	745.572	738.624	830.966	415.804	620.581	837.468	1016.27	983.866	0
HEM14	670.535	686.732	350.694	549.387	452.732	489.544	504.443	668.572	470.225	377.153	355.511	289.193	0
HEM15	604.271	821.434	621.763	612.764	598.434	702.894	749.327	772.49	674.416	797.28	618.234	652.716	0
HEM2	1088.11	869.884	1040.9	1627.33	1138.65	1696.94	1723.93	1217.6	1929.96	2090.72	1893.81	1208.19	0
HEM3	92.1353	149.196	136.854	170.32	98.4717	157.868	146.992	170.184	226.428	198.362	174.113	144.352	0
HEM4	975.48	630.414	446.079	529.429	372.04	585.039	735.719	814.345	691.727	595.599	581.21	479.296	0
HES1	41.0682	33.1821	333.839	325.618	276.883	167.881	180.439	169.814	20.3573	10.8341	11.281	13.0466	4
HEX3	478.349	606.994	479.861	643.35	585.408	442.389	428.626	417.439	419.519	414.552	403.149	387.123	0
HFA1	108.879	165.607	335.339	249.378	200.617	143.542	194.003	173.739	141.086	237.84	195.152	327.145	1
HFI1	145.948	225.907	138.306	170.701	142.112	184.127	225.747	199.146	184.606	182.294	203.226	182.771	0
HFM1	29.9144	37.9552	49.8192	44.7996	46.1825	53.568	56.7957	45.0838	63.4096	68.633	61.07	65.7653	0
HGH1	1312.27	556.596	739.066	725.38	642.271	926.335	1060.08	959.025	1205.47	685.013	1310.41	1038.42	0
HHF2	6944.01	6679.85	7935.26	6943.3	7512.55	8058.98	8193.68	7434.48	8158.71	8254	7717.41	7932.22	0
HHO1	942.334	1496.96	632.138	1155.87	1439.49	1055.07	1504.83	1166.96	1515.19	1030.03	1237.44	1199.11	0
HHT1	10351.8	11510.2	9184.52	10066.4	8992.98	9293.31	10578.8	11002.7	11060.3	8258.4	7820.14	7853.22	0
HHT2	9601.71	9991.69	8830.81	10388.6	11386.3	10575.8	11141.7	10676.9	10395	11659.2	12095.2	11194.8	0
HIP1	186.577	247.927	292.192	438.141	403.354	431.908	417.406	205.287	289.309	392.709	419.31	340.315	0
HIR1	105.46	104.581	91.8556	102.117	105.036	116.345	127.076	119.294	96.1811	116.768	138.876	103.935	0
HIR2	410.527	481.383	357.926	395.389	355.182	418.254	492.36	599.691	451.325	514.458	536.988	439.166	0
HIR3	208.016	152.814	429.44	464.567	423.46	271.75	265.742	218.617	280.91	439.363	409.971	369.864	0
HIS1	2155.76	1115.81	2464.06	2838.97	2462.48	2993.85	3344.09	2643.27	3119.73	2892.96	3768.6	3026.98	0
HIS2	402.401	726.102	634.835	987.51	781.645	910.74	697.628	687.399	853.558	852.286	803.547	763.374	0
HIS3	610.41	771.236	819.507	1235.52	1189.89	1597.18	1688.15	1851.78	1232.29	1328.48	1612.84	1133.09	0
HIS4	2585.76	3126.11	3651.42	5097.58	5772.9	3902.81	4315.41	2846.64	3219.42	5978.48	5025.16	4188.17	0
HIS5	1484.52	1258.1	1573.04	1584.07	1290.94	1361.88	1164.34	1114.16	1076.58	1469.25	1090.88	1022.77	0
HIS6	222.17	116.828	157.988	159.583	134.012	191.758	162.398	114.735	220.898	198.497	233.811	235.768	0
HIS7	837.672	1054.02	1331.54	1816.23	1547.1	1248.1	1514.4	931.352	1450.68	1736.59	1841.61	1215.35	0
HIT1	94.1726	103.212	82.3226	93.5614	105.799	101.594	111.947	112.139	84.6606	89.0921	105.192	47.2616	0
HKR1	381.758	283.873	260.424	155.322	245.327	219.716	243.059	223.988	194.786	191.64	255.077	339.038	0
HLJ1	739.3	569.68	520.072	714.742	564.945	693.616	713.307	796.257	647.332	543.266	651.044	498.01	0
HLR1	148.128	115.41	196.783	130.534	108.362	180.599	171.401	200.586	224.895	53.3286	217.069	389.808	0
HMF1	2286.1	2259.98	2618.02	2158.98	2366.22	2824.62	2641.76	2787.92	2745.03	2048.92	2294.75	2379.5	0
HMG1	5751.45	6489.86	6729.32	7939.44	7113.25	5552.68	6225.25	7168.83	3641.49	4076.55	4454.24	4941.65	0
HMG2	1289.19	1449.5	1356.77	2216.6	1844.33	1344.55	1345.08	1574.36	976.235	1533.55	1416.4	1236.08	0
HMI1	92.289	109.177	99.1909	98.1743	95.8693	110.905	132.681	121.451	112.249	90.9486	146.15	133.026	0
HMLALPHA1	5.9781	4.2447	9.1635	10.843	5.0218	5.8575	8.4216	5.0227	8.4834	7.6239	9.5017	9.0844	11
HMLALPHA2	836.582	831.284	765.135	483.104	438.315	521.743	575.35	609.793	755.049	705.365	549.777	764.986	0
HMO1	3660.05	4250.35	2781.71	4506.48	3372.65	2927.2	3426.9	2476.84	4209.19	4335.83	4440.4	4769.77	0
HMRA1	3313.53	2056.59	2451.86	1452.19	1220.88	1545.32	1794.28	1303.41	2447.14	1974.62	1675.93	2389.69	1
HMRA2	1607.5	462.92	1286.01	868.661	481.948	577.301	594.293	211.877	789.028	580.852	851.94	807.966	0
HMS1	70.2624	46.0227	49.583	48.3471	34.2963	28.7898	29.7221	37.132	18.5806	140.164	150.414	181.413	6
HMS2	161.992	168.827	84.3658	127.765	111.664	119.149	162.083	236.236	168.97	220.31	426.011	367.918	4
HMT1	1366.8	1067.2	842.621	905.882	667.306	1219.97	1344.87	1683.16	1800.4	690.588	1305.28	1298.75	0
HMX1	5204.16	4630.87	4265.27	4925.36	4320.74	3630.59	3287.79	4794.11	4813.55	7387.32	6062.15	6813.16	0
HNM1	1664.09	1233.06	1942.12	1991.18	1787.97	2258.59	1976.76	1874.24	2172.18	1882.55	2496.52	2730.03	0
HNT1	13720	18518.2	12439.8	15704.8	15318.9	13506.2	12725.5	14862	12182.9	15936.7	14186.5	11688	0
HNT2	480.441	572.117	852.778	615.332	607.622	602.007	586.217	355.113	664.057	588.598	520.981	511.937	0
HNT3	342.511	378.193	207.647	207.865	186.285	193.636	188.91	173.332	201.568	169.913	108.636	95.3077	0
HO	336.068	222.206	764.133	890.873	435.355	805.26	1060.43	1274.89	1498.1	1642.66	1771.02	2686.24	0
HOC1	35.139	26.6327	93.087	99.631	129.994	90.4573	68.2553	50.9721	86.7004	101.246	106.161	116.224	0
HOF1	85.2004	72.7651	207.431	246.707	212.403	256.992	235.621	276.651	166.452	292.557	296.916	323.087	0
HOG1	1164.08	958.454	1292.84	2200.78	2028.71	2322.88	2367.44	2404.5	2270.94	2868.5	2487.48	2172.55	0
HOL1	317.769	501.946	357.692	553.847	543.673	499.169	455.415	484.82	360.341	521.963	406.594	316.652	0
HOM2	4163.19	5170.54	4544.49	5349.9	5105.68	4546.48	5213.22	4918.92	4485.38	3993.02	4179.61	3686.69	0
HOM3	375.5	282.959	441.362	289.545	380.024	419.693	313.571	305.207	310.183	394.661	567.542	704.25	0
HOM6	4075.16	2954.92	8470.2	8817.46	9287.45	6971.15	5998.29	4683.88	6977.35	8736.42	8819.75	7979.66	0
HOP1	195.647	149.627	85.4556	83.2306	69.619	86.2574	69.8811	91.1306	82.7332	94.3518	87.4696	75.2526	3
HOP2	34.3852	22.4256	14.2206	15.0077	12.4149	14.358	9.1707	11.9519	21.1929	6.3501	6.4507	7.4017	5
HOR2	455.861	375.408	421.725	788.423	615.772	341.706	384.663	286.693	170.887	492.307	368.875	404.366	0
HOR7	12538.5	14080.1	18648.7	16550.1	17240.9	16878.5	15985.9	16059.5	15976.4	16491.6	14527.7	15212.7	0
HOS1	133.589	181.374	94.1392	121.501	111.106	130.659	115.806	74.4171	126.564	98.9218	105.924	68.3604	2
HOS2	23.6839	21.4666	51.9263	21.3202	21.805	22.7224	16.257	21.363	19.7425	16.3168	18.2369	15.121	10
HOS3	108.885	122.972	138.574	112.115	107.12	136.9	139.613	155.037	135.084	176.511	133.433	176.623	0
HOS4	1751.22	979.09	734.197	690.387	505.581	407.74	502.931	733.396	537.844	540.353	605.429	657.095	0
HOT1	194.275	260.139	226.375	271.655	253.728	218.725	243.673	271.188	186.234	137.558	209.125	187.781	0
HPA2	413.882	1314.74	789.704	953.886	772.473	582.053	612.272	274.559	406.903	398.11	328.117	412.322	0
HPA3	1799.84	3191.43	2142.87	3374.56	2984.88	2746.44	2964.78	2040.24	3094.13	2102.39	2606.63	2688.73	0
HPC2	304.036	235.121	177.09	199.462	176.427	144.583	188.421	126.625	58.0907	244.547	246.176	230.942	0
HPR1	61.6933	65.6039	77.7031	70.9982	79.5416	84.2964	91.6053	98.2578	74.6314	92.9016	117.286	93.309	1
HPR5	205.602	61.2094	430.842	371.412	432.078	268.608	100.683	267.503	227.937	364.199	367.017	472.23	0
HPT1	2486.8	2113.86	3003.96	2345.25	2329.12	2754.3	2872.81	2464.39	3767.22	2368.05	2805.15	2806.72	0
HRB1	336.352	404.233	969.033	569.864	718.115	762.595	716.935	718.577	849.196	621.735	815.661	846.371	0
HRD1	372.83	451.054	388.07	435.234	425.899	371.473	398.084	385.973	271.362	410.24	332.846	256.13	0
HRD3	130.447	131.871	208.604	134.294	184.706	113.389	111.572	134.748	83.9702	147.847	117.848	149.07	0
HRK1	1522.41	1495.18	1554.96	2232.98	1935.35	1281.45	1393.51	1612.49	909.586	1700.42	1474.14	1890.23	0
HRP1	1460.66	864.795	1152.23	1372.57	1217.05	1035.76	1147.23	1340.63	1342.99	1115.04	1099.16	1457.02	0
HRR25	1073.25	1025.79	891.748	989.426	904.918	842.16	916.287	1220.57	1159.2	761.039	898.458	929.408	0
HRT1	2035.26	1670.5	968.411	1194.58	1384.35	1328.18	1423.01	1422.94	1249.66	1478.21	1197.42	830.578	0
HRT3	67.4584	94.3941	175.142	153.345	187.508	109.537	98.9476	95.2138	112.468	155.699	104.147	76.893	0
HSC82	7362.83	6920.01	6719.63	6387.94	7224.99	6117.23	5984.48	6137.61	5608.75	6080.89	5795.71	5186.96	0
HSD1	642.97	814.615	996.227	862.112	858.434	802.116	945.336	971.994	869.672	1225.87	1376.29	1249.1	0
HSE1	713.303	579.355	404.933	483.885	533.296	408.933	476.922	306.837	452.807	446.317	457.202	492.271	0
HSF1	498.163	398.629	313.141	406.619	344.37	397.804	390.873	278.048	317.918	252.917	285.919	417.194	0
HSH155	83.8254	99.5101	118.195	136.126	100.366	79.51	107.582	73.2879	88.9306	102.691	117.315	101.072	0
HSH49	146.358	128.353	88.4273	107.099	97.0894	83.5941	114.362	64.5487	91.3058	70.0937	65.007	36.9616	0
HSL1	22.5735	12.9327	34.8919	24.9156	50.6201	53.433	56.2202	47.2738	35.667	55.1669	68.7604	48.0708	0
HSL7	224.954	319.255	307.993	359.807	356.378	359.167	357.876	395.78	317.677	331.608	389.198	427.622	0
HSM3	152.275	164.849	180.551	176.315	217.918	178.081	196.635	166.25	154.11	183.461	149.425	88.1745	0
HSP10	5839.12	4720.58	6416.22	5583.56	4706.12	5395.42	5433.64	5354.72	5771.6	5372.1	5728.74	5276.79	0
HSP104	7180.7	5020.06	6052.56	6064.34	7113.56	3983.32	4619.7	4378.9	2555.96	4252.68	2422.88	2162.19	0
HSP12	15091.1	13989.1	13813.2	13509.3	14684.7	10117.2	9792.04	8381.11	1329.35	5070.18	2113.06	2860.76	0
HSP150	450.919	134.763	235.958	427.338	751.752	335.655	235.484	307.555	228.086	282.123	300.07	249.181	0
HSP26	11684.6	11590.9	10798.9	9866.71	10977.9	7855.91	8341.68	8083.76	990.792	849.553	774.508	566.853	0
HSP30	7578.67	1509.1	5699.44	5758.76	5263.75	2089.51	2248.75	2515.15	108.299	537.171	313.609	224.745	0
HSP31	3145.19	3024.6	2372.72	3475.06	3173.4	1697.41	1753.58	2222.37	1027.84	4169.35	3554.36	3167.72	0
HSP42	2577.29	3728.91	3061.49	3947.36	4551.73	1588.16	1423.85	1769.84	802.688	2365.81	621.783	535.49	0
HSP60	5789.83	5966.67	7509.49	8152.47	8347.35	7662.23	7830.77	7275.73	7941.03	8636.23	9304.04	10279.6	0
HSP78	3669.91	3554.46	3380.84	3077.17	2938.13	2106.32	2128.79	2139.79	2232.53	2400.07	1495	1614.51	0
HSP82	8375.81	7007	4952.77	5117.83	4819.36	3055.7	3403.24	4102.66	3230.86	3738.55	2321.64	2205.27	0
HST1	1234.68	1019.57	793.445	1320.49	822.573	614.984	695.116	656.515	1036.43	841.892	903.665	930.107	0
HST2	258.285	519.495	120.357	250.409	240.33	197.348	237.926	334.043	182.554	357.628	244.361	196.152	0
HST3	45.8279	54.9337	103.661	87.903	118.502	59.8294	61.098	43.6554	67.669	98.4848	109.468	92.6575	1
HST4	163.902	185.686	128.48	135.894	93.6187	94.6477	106.14	99.7542	96.4521	87.1665	84.4403	86.2416	0
HTA1	8967.89	7778.3	7610.39	7495.24	6284.38	6788.86	6927.81	6971.66	7487.56	6023.38	5748.03	6024.29	0
HTA2	4931.25	3862.39	4491.08	3404.59	4017.29	4976.55	4816.64	4421.94	5189.52	4705.9	4508.68	4041.2	0
HTB1	7402.32	6309.05	4967.83	4739.42	4941.27	5480.41	5449.98	5934.38	5486.69	4831.75	5101.94	6220.53	0
HTB2	1309.93	2341.06	1974.8	2254.71	2162.99	2743.17	3125.59	3339.19	3182.38	2392.76	2658.68	2641.76	0
HTL1	83.5501	67.2528	75.8853	35.3473	47.7567	107.972	89.4504	71.2369	106.978	85.3981	59.4357	51.0793	0
HTS1	1835.66	2452.48	3744.2	3845.82	3224.31	3422.49	3648.45	3657.92	3797.26	3799.34	4075.19	4353.3	0
HTZ1	673.947	689.013	1568.2	1307.39	1229.66	1291.93	1157.36	1279.94	1314.05	1282.19	1454.83	1644.23	0
HUA1	458.447	466.617	203.479	356.036	322.064	321.46	310.843	371.904	258.965	389.237	418.604	481.611	0
HUA2	70.0905	100.493	113.337	111.227	117.987	160.317	172.842	69.1082	154.811	123.739	144.276	74.3871	0
HUB1	1319.83	722.519	789.263	687.736	513.208	928.824	972.427	1074.6	1038.95	1013.06	922.095	1116.14	0
HUG1	102.266	74.5661	97.8083	172.155	111.64	138.857	145.323	187.493	70.7591	54.9254	55.9209	63.9433	0
HUL4	200.081	242.669	441.401	309.684	316.654	235.802	232.543	323.98	160.24	235.426	133	139.183	0
HUL5	629.144	660.562	687.902	819.368	594.821	544.054	620.616	387.053	511.88	547.73	367.21	324.992	0
HUR1	17.61	16.3836	23.8208	11.1686	15.0517	13.0784	9.8313	9.8757	26.5202	18.2801	17.1975	26.2486	1
HUT1	876.386	869.217	562.686	648.213	590.755	910.879	887.318	977.697	1045.76	881.441	855.738	762.124	0
HVG1	1723.17	2059.54	735.373	1071.69	769.95	515.089	526.121	753.646	469.93	511.792	352.304	346.141	0
HXK1	7233.25	6450.02	4100.51	5691	6572.98	4334.24	4357.68	4152.16	4135.73	6948.67	5474.31	5673.74	0
HXK2	2814.47	2159.16	1986.48	2206.81	2147.79	3195.32	3460.37	3097.78	3161.96	3722.41	3880.55	3740.39	0
HXT1	72.3866	55.194	120.819	102.605	78.5899	72.468	62.9955	69.5737	62.5336	109.323	88.7879	96.8687	5
HXT10	433.013	450.445	113.307	141.857	131.031	115.065	118.195	145.417	147.248	52.8463	40.9426	39.8122	3
HXT12	301	148	121	120	79	128	113	142	165	166	165	131	0
HXT14	31.4749	28.8513	12.055	17.937	13.4882	12.2622	22.3606	22.7312	19.3169	15.8661	15.9955	13.8852	12
HXT16	91.9388	66.4078	68.8599	70.4077	70.163	79.4602	76.5785	108.089	69.7412	3995.42	1827.6	660.901	0
HXT2	2364	5691.35	5523.81	5858.36	6529.26	5265.51	6350.58	5551.86	5554.75	4053.2	3473.66	2999.03	0
HXT3	1002.45	687.504	574.657	877.576	720.346	629.538	572.804	552.054	555.596	654.129	567.324	609.421	0
HXT4	461.282	301.228	386.919	365.255	439.057	485.048	360.241	301.371	208.596	459.731	387.199	334.084	0
HXT5	6060.04	5709.13	4526.59	6158.91	6731.93	2785.06	2896.32	1829.18	343.454	238.431	198.559	184.808	0
HXT6	14710.5	12429	10240.5	10668.9	11540	10339.8	10340.5	10235.8	10559.4	10744.8	9965.28	9992.25	0
HXT7	10658.2	10781.5	9521.39	9443.49	10207.2	9309.67	9127.19	8604.29	9310.88	9892.08	8956.65	8969.21	0
HXT8	101.546	69.4835	57.9601	57.2565	62.0673	56.4107	68.25	98.0213	55.5651	70.6954	70.8454	64.8567	5
HXT9	284.238	79.2849	138.642	191.017	161.748	95.5889	88.543	145.381	93.7962	130.186	103.378	96.0998	0
HYM1	592.067	417.235	578.665	406.444	398.259	381.922	411.417	484.201	293.539	518.769	453.98	417.5	0
HYP2	13140.5	13145.8	12772.9	14547.9	15450.2	11949.4	13197.7	8537.47	11873.2	10742.6	11529	13028.9	0
HYR1	5025.85	5686.99	4072.34	4493.25	4859.59	3002.39	3286.82	2708.91	2612.97	3050.07	3172.69	2964.16	0
HYS2	152.584	61.2624	208.902	248.482	262.348	163.547	160.55	140.181	187.84	197.416	239.505	249.328	0
IAH1	353.684	464.853	343.37	324.528	439.602	454.305	533.016	334.444	348.684	379.056	282.284	165.002	0
IBD2	471.366	454.044	405.757	408.079	375.549	328.497	364.594	311.362	333.025	184.383	323.435	293.561	0
ICL1	1088.34	2799.85	2978.21	4407.93	4181.3	3175.53	3204.59	3250.25	3919.39	2687.02	486.279	395.484	0
ICL2	3550.9	3569	2500.91	2521.15	2925.99	2810.86	2936.28	2677.26	2561.76	1316.29	952.658	800.568	0
ICS2	1733.27	1893.62	838.669	779.731	875.376	712.298	907.951	915.579	503.389	126.927	159.214	110.238	0
ICS3	73.5637	97.1659	180.339	59.0518	49.2058	55.7856	66.1153	102.816	66.8811	92.4777	57.3297	72.4215	0
ICT1	1727.45	992.406	1097.99	1601.37	1499.49	928.057	953.519	962.874	561.517	678.226	660.871	777.26	0
ICY1	447.797	282.297	585.938	664.556	344.58	376.098	478.132	429.13	358.221	1872.98	889.579	880.426	0
IDH1	387.904	551.484	1296.91	1793.26	1918.88	1756.39	1989.84	998.262	2010.56	2365.31	2428.96	1482.59	0
IDH2	3306.15	2886.79	5073.81	5274.22	5166.46	5580.11	6440.67	6019.19	6929.55	7890.44	7558.96	6396.87	0
IDI1	1989.38	2456.4	1286.08	1515.7	1440.83	1239.77	1358.5	1468.7	1085.82	1168.58	1297.46	735.782	0
IDP1	1411.64	1441.77	1172.42	1993.19	1857.25	2199.69	2465.59	2598.45	2092.67	1155.34	1461.98	1959.14	0
IDP2	2160.84	2038.82	2636.58	2601.29	3070.92	2470.83	2691.98	2217.08	2178.3	859.869	232.426	133.091	0
IDP3	801.996	1459.66	1510.94	1266.56	1278.31	685.742	731.326	786.406	558.765	237.624	213.867	229.264	0
IDS2	125.054	102.882	121.427	129.386	141.94	113.038	136.281	149.896	108.912	98.9528	127.637	87.6155	0
IES1	843.101	661.742	614.378	794.198	620.634	790.427	774.911	708.481	822.187	856.276	812.811	1176	0
IES2	475.562	629.689	737.47	567.121	473.513	429.968	444.034	499.843	464.7	358.586	325.844	304.323	0
IES3	157.632	234.565	228.582	207.949	150.563	196.815	205.543	248.858	208.553	199.403	219.304	259.681	0
IES4	84.6632	92.5241	315.558	209.175	230.58	403.444	294.041	252.154	392.733	265.335	341.837	230.188	0
IES5	3155.24	1935.27	2035.64	1489.77	1240.97	1786.5	2125.08	1403.78	972.639	1755.54	1912.59	1643.61	0
IES6	498.609	670.394	324.435	404.243	473.642	457.387	436.679	373.282	481.077	341.594	378.718	235.263	0
IFH1	447.138	342.688	364.707	415.43	276.312	352.011	520.231	651.494	327.414	250.399	637.303	653.365	0
IFM1	187.192	209.844	272.322	290.611	248.814	291.066	319.369	297.322	442.352	481.584	421.911	548.196	0
IKI1	309.879	258.308	267.61	269.066	225.322	257.333	220.188	177.077	256.735	156.435	211.169	168.818	0
IKI3	140.303	277.824	281.763	304.379	307.783	262.921	263.822	339.807	187.72	299.471	322.845	270.055	0
ILM1	406.648	215.808	355.158	257.171	292.337	368.621	433.075	376.713	320.289	410.366	283.812	214.141	0
ILS1	1185.7	1268.87	1547.29	1289.79	1127.57	1114	1231.78	1132.15	1032.28	1562.58	1460.61	1568.45	0
ILV1	992.57	783.579	1177.5	1297.1	1457.75	1712.9	1781.31	1357.38	1361.42	1255.53	1739.82	1490.6	0
ILV2	4042.28	3155.82	2891.87	3631.7	4061.03	3058.14	3670.92	3199.91	2842.88	3041.44	3632.4	2791	0
ILV3	3225.48	2765.47	3098.35	4233.11	4354.84	4332.89	4818.32	5130.7	3564.05	3695.95	4676.18	3505.71	0
ILV5	4424.85	4302.84	5297.51	6453.03	7149.64	6619.37	6814.33	6912.63	6167.81	4122.63	5795.59	6405.81	0
ILV6	3827.51	6202.1	2102.7	4416.82	3659.49	4554.97	4864.9	5067.47	4524.79	3236.03	3651.66	5008.88	0
IMD1	172.49	90.5617	122.502	127.833	212.068	395.823	405.185	406.898	443.778	300.42	447.549	220.059	0
IMD2	2958.11	2785.78	3208.04	3063.15	2820.98	3298.62	3207.15	2750.97	3926.08	3548.57	3883.39	3721.24	0
IMD3	3225.58	3788.21	3953.2	4014.5	3266.68	4344.48	4784.3	4741.31	4731.88	4414.92	4819.77	4580	0
IMD4	333.667	367.324	719.093	709.74	615.234	962.34	956.669	963.98	1002.87	1075.51	1704.3	1602.5	2
IME1	149.566	125.246	137.557	173.493	119.163	79.9804	95.4003	121.826	75.941	75.6633	79.9676	77.92	0
IME2	9.4939	6.0619	14.504	11.5733	19.8704	11.4236	15.2659	12.2108	11.3312	11.7526	8.4662	4.9901	2
IME4	28.5384	30.0683	29.1617	24.903	21.0011	29.1941	23.2006	28.9913	37.7877	36.6664	35.1558	30.3146	8
IMG1	2183.55	2926.78	1931.03	3940.8	3735.35	3099.8	3178.79	2804	3623.93	4665.7	4520.32	5055.43	0
IMG2	351.387	399.687	284.381	325.237	343.181	527.402	502.572	631.926	747.302	562.992	593.154	640.964	0
IMH1	689.918	570.026	710.697	665.368	768.826	722.172	819.9	748.573	657.282	778.067	728.833	598.432	0
IML1	80.5611	136.749	287.457	344.124	394.53	303.274	258.359	325.791	193.942	259.283	364.814	279.089	0
IML2	504.934	409.156	257.856	442.191	456.805	331.746	370.313	388.281	253.547	450.028	361.325	314.59	0
IML3	85.836	120.975	127.821	108.488	113.711	86.2199	106.779	118.569	105.647	102.798	94.8714	59.4479	0
IMP1	1732.29	2284.36	1641.21	2077.79	1811.15	1746.67	1915.43	2159.45	1964.12	1664.07	1532.57	627.491	0
IMP2	371.542	442.58	268.294	315.572	313.132	519.08	469.478	548.204	422.416	352.459	403.333	251.345	0
IMP2'	1528.64	1069.95	361.513	714.583	497.422	475.795	440.218	631.334	539.312	551.89	560.729	524.665	0
IMP3	317.955	177.659	180.862	159.432	107.791	226.717	269.961	228.981	369.7	166.018	315.912	238.53	0
IMP4	576.47	421.105	796.59	829.12	494.452	1057.72	1058.61	888.059	1242.17	583.185	785.008	803.507	0
INH1	2414.58	3195.35	3191.53	4056.05	4467.1	3440.66	3930.25	3790.73	3888.71	2607.55	3314.4	3450.66	0
INM1	665.677	476.487	435.097	419.59	274.467	391.668	377.418	295.059	490.688	342.818	526.71	607.17	0
INO1	1200.39	559.777	1783.68	2303.28	2935.16	1033.25	1492.11	1710.81	1094.3	891.637	1645.5	1198.47	0
INO2	245.355	296.698	89.5896	146.556	163.425	146.731	155.146	167.645	195.015	85.1807	182.221	111.074	2
INO4	217.098	208.637	221.974	163.779	161.108	173.285	170.707	176.232	234.296	183.33	217.387	172.285	0
INO80	559.355	422.359	453.012	380.486	487.645	378.668	406.576	344.614	313.503	380.865	382.321	317.854	0
INP51	183.265	228.668	305.873	296.565	313.595	154.164	186.644	79.9723	168.307	230.692	242.569	244.315	0
INP52	95.1619	115.743	98.7417	135.485	113.165	131.177	142.754	184.068	130.965	129.62	170.186	252.454	0
INP53	589.851	520.813	268.323	403.285	390.223	379.622	418.528	511.208	482.324	464.834	474.16	344.901	0
INP54	322.511	474.44	368.72	322.96	241.695	272.138	296.732	334.552	199.82	272.422	162.724	195.352	0
IOC2	324.634	565.415	745.908	644.084	540.689	446.155	482.805	797.927	545.764	475.517	610.914	1072.38	0
IOC3	174.388	144.902	134.672	137.835	150.751	174.67	172.119	168.974	151.654	200.038	265.922	213.449	0
IOC4	434.367	557.614	670.625	605.455	576.612	443.131	583.309	475.557	488.265	647.805	572.218	627.386	0
IPI3	42.3121	52.812	120.405	81.0898	82.9176	154.276	163.47	116.344	171.892	82.067	151.754	139.469	0
IPK1	77.22	113.169	62.2854	61.6872	77.1971	76.0298	72.0472	73.8848	102.147	61.5468	45.9597	40.3438	0
IPL1	39.0512	50.7842	41.3841	44.9469	47.8391	56.9179	69.0858	52.176	72.5139	53.0443	80.5522	75.3882	0
IPP1	5363.97	6534.4	4890.62	5442.3	5595.26	5501.9	5501.65	6634.4	5814.31	5025.27	5168.77	5932.89	0
IPT1	539.892	605.9	700.203	717.478	636.204	574.865	597.758	694.864	598.061	492.854	408.416	408.316	0
IQG1	109.539	90.9333	91.5607	77.4092	93.3136	82.0674	78.5882	63.2471	47.057	60.6902	54.8679	61.5825	0
IRA1	323.35	532.043	826.977	511.894	598.079	336.703	325.789	324.885	203.418	231.491	195.535	240.177	0
IRA2	972.845	1315.81	1170.48	877.777	1233.76	597.943	595.648	503.001	372.291	381.653	336.588	315.724	0
IRE1	97.4221	71.0541	59.6853	71.6183	69.0359	61.9841	64.9102	46.8382	53.8778	51.5769	68.7744	57.3754	0
IRR1	188.643	176.601	222.051	176.555	153.93	136.798	138.189	136.81	145.784	185.738	174.512	250.563	0
IRS4	12.2512	32.8337	68.7796	57.604	56.0784	33.5891	39.2124	24.9572	12.4767	31.0032	28.7107	36.3428	0
ISA1	1645.99	1123.66	1347.5	1368.35	1197.6	1453.15	1647.17	1795.32	1211.88	1509.29	1385.97	1244.59	0
ISA2	346.175	471.269	333.869	434.054	427.946	602.147	656.202	426.36	625.936	675.477	621.503	562.602	0
ISC1	719.017	1023.72	401.788	684.899	561.445	874.776	911.381	1155.97	978.342	898.368	1057.74	983.655	0
ISC10	295.895	241.507	114.259	122.387	120.859	140.792	143.948	142.748	161.383	118.429	128.935	117.962	0
ISF1	5845.25	4193.91	2615.95	2519.78	2691.54	1235.43	1589.34	1620.27	633.439	3783.83	1059.99	936.6	0
ISM1	271.22	220.889	315.386	289.88	258.656	384.602	391.919	435.969	639.246	465.746	561.849	632.18	0
ISN1	442.344	579.882	732.195	833.381	652.92	602.265	661.909	677.735	578.633	574.339	450.482	359.049	0
ISR1	366.461	370.855	202.992	229.779	229.983	195.892	201.786	248.027	177.227	309.675	332.001	389.837	0
IST1	27.3788	26.2325	31.795	31.4607	40.2563	29.264	35.0435	18.9068	25.6622	23.083	21.1222	19.1293	2
IST2	2066.76	1811.58	1783.55	2175.52	2310.12	1144.04	1509.02	1334.93	1585.97	2240.8	1991.8	2476.26	0
IST3	522.041	278.455	365.333	317.72	273.221	317.614	309.443	156.692	310.741	202.196	219.924	210.377	0
ISU1	5022.96	2936.29	2394.75	2806.05	3222.05	3481.06	3280.6	3178.99	3443.78	2425.69	2630.59	1606.27	0
ISU2	732.335	1064.85	568.591	1038.49	1092.97	716.43	782.542	780.5	872.762	949.213	1387.45	1360.35	0
ISW1	146.817	155.083	207.339	190.613	217.351	215.627	212.671	190.852	181.754	222.959	339.525	337.98	0
ISW2	83.7658	95.3843	109.895	93.0211	130.236	89.0278	105.58	90.4809	68.5813	102.711	109.162	100.475	0
ISY1	732.661	257.923	345.676	322.425	324.982	377.388	418.352	487.755	377.595	379.31	380.312	275.221	0
ITC1	163.796	148.207	182.777	202.606	178.899	123.924	141.533	125.537	127.313	167.676	196.397	247.998	0
ITR1	3728.15	3720.61	4777.98	4695.04	5166.36	4862.47	4557.38	4807.43	4915.15	4756.57	5048.66	4844.63	0
ITR2	2148.1	1737.81	2259.95	2302.79	1756.46	1953.81	2259.83	2263.25	2442.15	1950.34	2073.59	2309.99	0
ITT1	176.222	158.952	161.643	163.442	133.264	118.681	150.697	125.41	133.946	139.299	128.378	97.7769	0
IVY1	930.075	1150.33	876.57	808.58	588.464	619.531	598.943	712.057	702.092	945.125	608.966	710.486	0
IWR1	150.508	226.105	98.7672	134.703	170.476	102.23	120.418	106.874	121.545	100.431	70.116	56.1128	0
IWS1	1586.29	1440.46	905.648	921.675	786.385	813.606	909.896	717.6	972.885	685.921	708.269	465.045	0
IXR1	927.05	732.5	585.494	903.151	945.035	460.637	440.173	461.445	826.028	706.557	905.241	1247.3	0
JAC1	572.66	346.536	239.295	301.746	255.996	270.247	301.681	306.695	353.049	254.859	342.438	527.577	0
JEM1	84.193	68.5745	73.6278	55.5932	54.9367	51.2556	64.7269	81.3971	68.119	73.3482	97.9711	114.318	0
JEN1	6631.71	6058.27	6039.12	6197.16	6886.95	5863.05	5668.65	6093.95	4102.73	3427.58	1192.69	657.711	0
JID1	168.62	157.287	142.911	160.54	128.507	130.692	126.227	148.44	158.839	246.347	139.122	95.3199	0
JNM1	187.554	163.529	158.37	169.696	131.708	145.002	162.817	146.933	185.305	107.688	149.275	168.142	0
JSN1	102.366	118.121	166.94	70.9857	243.361	41.4495	63.0671	65.6579	51.4637	98.1122	84.0541	49.8087	0
KAE1	912.348	1044.44	612.207	895.112	1134	934.939	1051.17	1078.18	831.508	766.98	883.979	609.758	0
KAP104	338.378	377.093	809.786	610.482	582.627	576.977	472.375	752.696	613.902	703.909	867.285	922.117	0
KAP114	70.5798	108.989	374.5	234.146	253.281	268.267	167.907	160.196	218.781	286.256	260.32	272.837	0
KAP120	195.193	173.589	146.581	138.461	155.406	172.43	187.981	168.849	122.932	163.826	147.479	121.422	0
KAP122	566.059	508.014	423.935	613.014	479.84	576.637	687.518	676.67	585.353	755.4	695.228	612.371	0
KAP123	1157.25	1158.57	1149.4	1132.56	1024.44	1081.51	1215.12	1303.86	1236.96	1436.3	1311.39	1494.96	0
KAP95	222.316	218.662	213.053	254.353	311.731	289.909	296.372	296.962	243.055	187.662	256.808	234.937	0
KAR1	139.014	103.654	150.843	117.59	86.9906	126.248	151.586	135.641	205.642	146.303	194.038	214.064	0
KAR2	4186.56	3768.19	4087.03	4165.42	4859.7	4368.54	4763.8	5014.19	3087.08	4446.31	4520.52	4011.36	0
KAR3	283.649	182.388	232.141	202.09	195.8	266.036	306.613	314.624	323.834	342.499	378.471	379.871	0
KAR4	862.894	874.35	546.811	588.41	471.021	563.723	687.469	733.844	703.879	392.092	504.098	409.146	0
KAR5	270.711	297.236	252.381	255.936	160.969	196.734	191.49	212.77	221.002	236.901	195.682	185.187	0
KAR9	36.6531	45.6265	26.735	38.1923	33.1395	32.5837	36.3176	50.7545	36.1119	29.734	44.8151	54.5196	0
KCC4	146.047	122.088	106.226	110.435	128.754	114.718	109.672	86.7425	110.495	187.658	216.295	227.326	0
KCS1	443.773	724.47	510.368	488.994	651.256	497.093	524.721	439.075	360.542	515.548	417.655	407.819	0
KEL1	185.729	192.733	249.951	215.411	279.366	132.323	162.446	64.8586	129.524	239.438	189.681	288.466	0
KEL2	296.447	197.778	360.097	238.897	248.748	189.052	159.004	156.445	268.75	424.803	357.317	588.209	0
KEL3	30.5154	43.7575	155.17	145.269	126.436	146.244	137.25	83.8378	205.982	178.387	275.327	233.369	0
KEM1	1116.95	1245.77	889.587	1196.58	1261.82	1022.94	1162.21	1080.85	922.654	1567.35	1486.48	1359.03	0
KES1	524.316	439.445	370.539	374.825	531.559	664.55	713.538	639.972	527.979	521.844	753.151	405.48	0
KEX1	137.006	98.003	175.671	110.862	99.6363	99.624	107.878	94.5207	96.5559	119.447	125.744	217.866	0
KEX2	151.372	275.74	334.632	464.207	417.01	379.127	278.502	544.465	345.696	375.202	430.249	463.005	0
KGD1	4139.6	3725.26	3969.73	5207.96	4982.96	4328.18	3767.99	3753.96	4425.67	6046	5151.44	5614.8	0
KGD2	2711.4	3586.95	2977.74	3638.54	3965.55	3235.93	3352.5	3172.34	2955.49	3250.73	2762.73	2458.98	0
KHA1	206.063	83.6246	470.196	417.933	439.804	232.763	221.415	167.68	188.708	363.197	275.641	285.706	0
KIC1	239.817	256.715	126.769	207.266	184.447	135.544	140.627	167.429	144.822	148.731	185.847	173.702	0
KIN1	297.004	446.196	271.027	295.394	356.541	250.622	275.606	261.359	163.669	305.861	257.578	219.551	0
KIN2	192.412	339.514	741.958	386.054	417.749	448.532	484.489	583.281	452.033	404.068	405.723	609.307	0
KIN28	215.863	211.584	142.632	150.084	121.978	156.811	165.881	152.741	204.445	102.592	114.767	109.858	0
KIN3	127.813	125.855	584.147	320.624	326.286	198.517	213.316	381.354	342.955	359.27	371.7	386.838	0
KIN4	314.691	355.939	339.977	400.282	324.29	415.955	450.405	550.957	391.586	431.681	660.173	480.532	0
KIN82	20.2704	34.5347	25.3085	21.2815	30.0468	24.2549	18.9829	16.5575	10.4247	32.8657	13.2237	17.7142	1
KIP1	21.829	43.924	51.3506	49.2461	53.0356	51.6761	51.7913	52.1375	46.8166	53.0045	56.9541	57.18	1
KIP2	116.719	148.237	122.973	198.96	231.776	214.026	243.58	254.013	177.686	332.069	359.726	264.047	0
KIP3	149.008	129.644	142.448	127.209	137.424	110.094	142.786	137.064	102.954	125.819	176.312	271.463	0
KKQ8	324.9	128.495	273.998	240.656	343.888	218.444	231.14	178.1	176.038	368.744	274.252	311.993	0
KNH1	2067.47	1243.04	1251.84	1287.22	1062.47	881.853	911.801	909.662	995.518	410.557	446.565	573.987	0
KNS1	473.234	415.975	323.531	289.441	485.446	260.635	309.417	271.814	171.293	185.563	174.04	242.291	0
KOG1	163.63	118.464	141.555	190.741	175.339	144.124	148.454	119.262	143.153	154.163	169.396	144.388	0
KRE1	2793.78	4781.45	1951.51	1884.85	2578.25	2633.84	3123.64	3638.42	2197.35	1982.87	2228.9	2832.98	0
KRE11	191.757	97.2335	157.631	128.288	100.111	105.801	102.938	105.383	122.611	154.878	185.827	218.901	0
KRE2	1536.26	1720.88	1320.01	1284.58	1365.09	1231.93	1138.68	1267.25	1082.04	1092.33	1023.85	1166.31	0
KRE27	3025.93	1638.87	3260.37	1966.93	1778.23	2436.53	2388.19	1916.02	2559.77	2253.83	2111.42	2579.63	0
KRE29	56.9166	66.3767	34.1499	29.1394	31.9476	29.2852	31.0875	28.7698	31.0786	22.6957	30.732	5.0435	11
KRE33	77.8827	69.1238	120.708	128.248	116.962	113.318	161.706	112.33	124.276	154.831	239.661	146.548	0
KRE5	145.619	206.787	204.434	218.986	201.019	176.52	193.038	208.952	173.638	192.045	190.493	196.695	0
KRE6	316.37	484.844	804.061	844.807	861.263	780.262	904.139	889.911	696.616	742.858	854.586	658.347	0
KRE9	1574.5	1249.63	1422.66	1451.04	1733.73	1369.63	1625.77	1703.22	1226.13	993.366	1051.83	726.204	0
KRI1	366.366	244.548	500.944	516.09	518.431	460.838	560.653	511.947	780.595	552.283	1065.11	1619.09	0
KRR1	1341.94	1185.85	627.676	779.158	674.205	878.409	967.015	1150.79	1039.4	833.487	1001.01	809.147	0
KRS1	68.4006	72.3535	85.7079	66.907	91.3395	105.885	107.15	98.5255	99.824	126.049	128.362	104.376	1
KSP1	1130.85	893.322	607.683	617.718	758.881	543.412	576.578	735.697	374.031	784.328	769.378	693.239	0
KSS1	361.077	270.615	85.0842	115.212	133.189	151.658	150.653	142.694	152.854	98.2185	134.536	103.992	0
KTI12	782.796	416.388	615.137	688.947	639.366	656.108	778.016	811.81	737.725	1052.22	1084.25	757.173	0
KTR1	2614.21	2319.56	2315.33	2135.13	1979.51	2160.42	2711.17	2500.3	2307.4	1768.84	1773.7	1960.05	0
KTR2	941.492	697.285	585.46	645.452	512.578	662.408	694.579	992.911	586.903	646.172	520.95	434.558	0
KTR3	512.457	877.369	384.071	435.754	667.302	610.182	678.953	661.628	572.239	625.995	720.564	480.934	0
KTR4	2270.82	2601.17	1544.36	1556.46	1582.83	1465.5	1599.08	1650.62	1353.49	1430.85	1106.5	989.068	0
KTR5	390.051	475.554	258.733	371.446	311.199	356.026	383.946	451.903	370.418	420.701	435.998	337.644	0
KTR6	939.085	1573.79	1318.33	1314.48	1174.28	1038.12	1120.15	1104.39	1101.91	992.721	766.346	842.107	0
KTR7	242.002	221.301	208.197	279.466	238.2	207.827	189.196	163.716	218.717	213.484	244.157	240.305	0
LAC1	440.609	393.854	460.571	359.878	364.9	380.944	463.408	460.368	282.869	249.069	308.079	275.789	0
LAG1	54.693	48.214	74.0143	70.0702	139.035	69.2648	71.7341	20.6308	80.6363	103.404	53.3294	71.6934	1
LAG2	586.385	478.437	345.386	293.81	333.555	312.049	338.483	340.787	248.629	223.893	197.992	246.917	0
LAP3	891.752	1449.48	1355	1573.36	1805.49	1518.46	1801.45	1705.24	1535.99	1165.65	1189.69	704.448	0
LAP4	362.251	589.415	821.298	1031.82	1070.63	604.904	712.948	891.617	433.948	1177.78	567.4	627.877	0
LAS1	128.029	216.93	423.505	263.887	229.629	266.478	260.139	230.221	224.844	139.69	178.085	187.007	0
LAS17	194.296	269.98	144.214	206.328	125.952	204.912	218.236	314.824	240.612	337.783	249.197	414.67	0
LAS21	79.6961	155.731	423.409	463.376	449.051	366.45	323.479	437.591	304.919	478.221	586.527	596.892	0
LAT1	2152.62	3253.74	3868.25	5339.6	4946.17	3207.81	4055.51	2245.72	3310.19	3316.53	3478.66	3299.15	0
LCB1	1003.22	1742.52	853.046	1458.69	1191.79	1423.72	1635.29	2132	1581.58	1699.59	2070.77	2970.64	0
LCB2	1857.98	1683.57	1368.98	1696.8	1245.58	1486.6	1663.85	1795.16	1388.44	1901.06	1621.81	1510.45	0
LCB3	88.8596	101.199	287.306	218.536	188.626	196.574	205.719	205.716	221.986	190.214	257.52	326.138	0
LCB4	71.1454	122.257	75.695	77.5077	25.9791	91.8033	96.4771	77.0715	67.9959	116.575	95.3539	95.7835	0
LCB5	183.704	196.592	270.098	295.046	237.123	244.697	273.602	270.397	277.502	292.374	297.161	319.004	0
LCD1	201.849	247.613	306	226.176	194.565	177.834	202.245	201.24	196.521	174.774	187	159.251	0
LCP5	425.608	403.555	668.071	731.349	455.109	537.071	561.931	613.063	734.191	335.206	597.425	864.052	0
LDB7	753.707	1030.66	501.866	643.932	730.889	737.849	694.533	874.894	674.597	722.114	554.65	420.219	0
LEA1	150.327	124.928	198.57	139.016	121.599	153.713	192.165	137.571	172.546	111.337	130.598	109.994	0
LEE1	874.769	826.415	322.879	325.952	406.339	229.761	377.951	295.643	216.692	251.845	183.74	186.585	0
LEM3	678.956	576.112	423.235	739.923	600.916	464.783	675.018	658.294	589.006	608.776	643.964	619.844	0
LEO1	407.766	467.433	1054.62	890.632	749.092	558.028	623.629	613.487	756.703	705.666	931.841	976.113	0
LEU1	1643.31	2688.76	2914.64	3346.51	2945.94	2664.16	2996.86	1186.58	2708.08	3028.52	2975.46	2787.46	0
LEU2	4917.29	5720.95	4185.58	5404.17	5514.31	4675.3	4947.39	4898.32	5493.22	5979.17	5996.72	5716.29	0
LEU3	766.386	363.298	237.063	296.361	325.19	281.156	301.553	372.337	511.227	297.868	398.002	325.35	0
LEU4	4607.21	6476.59	9361.15	9548.18	9947.98	6707.03	7319.42	6262.04	6991.79	6155.47	6086.89	6190.98	0
LEU5	364.064	266.07	225.956	261.297	184.207	264.811	292.96	228.006	311.312	324.673	215.865	183.514	0
LEU9	439.987	425.808	578.64	539.972	391.397	519.579	528.438	632.115	549.723	955.624	992.911	1083.76	0
LGE1	392.965	620.096	255.101	312.11	234.397	305.016	360.89	417.983	336.79	373.951	294.017	375.953	0
LHP1	266.144	270.76	250.326	240.622	260.114	372.389	377.869	288.233	351.23	366.33	384.863	371.924	0
LHS1	347.506	311.858	438.784	332.202	317.537	350.695	352.706	432.651	272.209	416.034	357.383	267.376	0
LIA1	873.761	1001.85	1821.53	2293.87	1567.98	2602.95	2672.72	3094.78	3127.93	2381.28	3290.28	3771.52	0
LIF1	87.7934	76.4699	58.0473	49.0639	37.5382	43.3854	43.1519	40.2965	51.2952	33.267	39.9594	63.0734	1
LIN1	624.263	212.8	251.994	164.263	130.667	167.806	187.606	141.823	233.987	169.727	178.383	183.499	0
LIP2	312.332	324.918	315.152	404.368	468.411	469.224	477.3	485.855	527.866	506.222	535.094	493.933	0
LIP5	1390.85	1259.43	838.22	1017.92	1042.82	1413.01	1561.28	1409.58	1373.23	973.722	912.448	730.092	0
LOC1	1421.52	1207.67	1238.7	810.906	860.89	793.582	839.542	635.885	1338.52	742.254	803.036	663.387	0
LOS1	173.553	126.317	375.538	277.693	257.672	286.724	318.174	264.095	281.036	351.897	430.133	420.751	0
LOT5	226.353	215.634	230.918	302.754	309.903	366.995	390.248	402.931	331.172	488.537	671.123	369.769	0
LOT6	253.414	305.499	219.645	231.948	214.091	255.102	277.796	316.99	277.171	247.522	190.529	156.656	0
LPD1	3452	4136.09	5154.67	5668.45	6201.2	4528.11	4794.74	4796.91	4875.6	5442.24	5370.22	4309.65	0
LPE10	214.963	357.183	341.312	320.399	305.447	171.2	181.472	156.681	141.102	278.076	149.33	143.159	0
LPP1	200.639	278.574	282.026	282.432	252.379	266.416	235.771	196.19	283.717	369.147	238.465	212.542	0
LRE1	144.098	232.584	211.356	234.439	194.456	142.304	147.575	169.838	154.605	317.019	213.024	279.413	0
LRG1	67.1669	73.8584	69.2369	59.0573	74.5127	78.6674	82.0735	75.8513	69.9352	76.887	93.7581	91.7499	0
LRO1	195.859	260.36	217.677	286.755	218.786	228.662	289.269	404.514	281.896	351.821	378.45	400.335	0
LRP1	343.959	209.276	364.127	204.038	165.116	201.214	227.833	107.035	270.657	152.072	194.526	206.342	0
LRS4	385.296	236.907	192.395	181.964	161.905	195.003	241.946	206.948	231.928	143.714	197	433.22	0
LSB1	2229.5	2232.83	693.731	1128.46	1350.46	1594.43	1613.64	2080.93	1671.1	1519.19	1342.86	901.178	0
LSB3	1457.69	1673.6	743.04	1230.99	1222.1	970.977	1051.85	1013.7	939.764	970.428	1058.35	830.918	0
LSB5	569.832	1331.33	674.53	1429.97	1531.59	1131.87	876.068	1210.28	972.984	1267.81	1041.55	698.658	0
LSB6	735.395	857.451	529.299	642.186	563.291	572.82	639.928	1106.54	587.072	696.803	656.496	885.156	0
LSC1	4676.25	6047.47	6131.39	6445.47	6706.09	6457.79	6849.96	6781.38	6650.67	4958.24	4794.83	4211.44	0
LSC2	3768.4	3274.18	3350.27	3949.56	3386.15	3723.24	3594.83	3264.33	3687.35	2354.94	2439.75	2360.32	0
LSG1	112.566	137.172	138.249	165.487	134.307	136.144	145.48	155.913	192.942	189.751	215.02	357.295	0
LSM1	330.695	95.7874	323.557	345.025	298.07	311.027	454.793	316.16	447.217	471.167	609.814	597.245	0
LSM2	934.298	794.982	898.089	605.85	602.605	905.638	854.28	918.173	1046.83	855.504	706.12	897.556	0
LSM3	2594	3626.04	4017.89	4355.75	3118.99	2576.85	2992.63	3863.48	3413.29	3024.02	3453.22	3936.27	0
LSM4	455.969	233.206	311.654	207.697	159.937	243.433	241.915	228.68	302.685	235.99	238.42	300.932	0
LSM5	3145.19	2913.3	2970.16	3861.12	2743.12	2656.63	2733.06	3122.23	3344.59	4121.01	4084.42	3950.37	0
LSM6	3186.26	2677.92	1903.48	2240.93	1743.21	2362.1	2207.75	2540.01	2426.77	2310.28	1611.18	1204.63	0
LSM7	918.748	954.007	1283.45	1066.27	824.83	1006.74	975.33	991.425	1140.96	1155.57	860.442	1072.1	0
LSM8	441.495	446.662	456.202	462.702	358.256	389.486	411.584	603.115	399.466	581.924	473.9	514.973	0
LSP1	4916.96	5973.39	4991.57	5307.53	5810.54	4250.69	4337.84	4645.46	3764.3	3971.61	2502.7	1773.32	0
LST4	313.288	394.051	415.969	429.355	559.992	416.792	520.57	514.623	320.634	263.106	294.193	285.944	0
LST7	204.87	139.596	272.717	242.409	217.242	262.596	242.105	111.821	229.693	218.085	219.234	183.474	0
LST8	1177.74	1347.2	858.604	1013.57	1356.01	1040.84	1080.61	973.93	830.013	814.259	859.828	471.915	0
LTE1	32.322	40.1475	108.095	82.1112	99.1086	73.9636	96.315	100.252	57.8301	84.33	141.726	144.74	1
LTP1	893.847	1090.45	1073.94	966.647	1010.66	1370.77	1322.99	1392.94	1383	1188.05	910.666	548.575	0
LTV1	68.0943	107.818	371.759	307.279	289.018	471.026	424.191	384.28	561.028	285.197	472.739	471.568	0
LUC7	82.1678	169.901	70.137	91.3777	82.1207	75.8247	91.8444	80.7704	81.4654	90.7211	66.4583	85.9414	1
LYP1	940.626	935.703	1153.35	1296.88	1612.47	1258.02	1525.34	1086.29	1128.94	1457.42	1980.55	1572.49	0
LYS1	1470.82	2067.45	2960.45	3307	3042.73	2363	2443.88	1247.97	2303.94	2358.54	2451.04	3693.54	0
LYS12	5258.44	4483.79	4532.98	4372.58	4104.51	4356.95	4322.41	3809.1	4233.97	5089.87	5290.07	4703.92	0
LYS14	19.4721	19.8238	38.0457	17.1254	39.8157	25.7671	34.8682	13.9431	14.8002	23.572	22.4704	23.1522	1
LYS2	1215.35	1882.4	3002	3827.33	3181.17	2082.84	2217.07	975.597	1616.11	3354.26	3306.78	3214.21	0
LYS20	5309.24	5785.98	6891.87	7760.6	6843.02	4538.81	5619.82	5263.04	5421.44	6588.95	7647.83	8813.75	0
LYS21	1758.92	1884.8	2511.25	1985.85	2306.7	2130.45	1944.48	1977.87	1592.21	2487.93	2452.62	2837.97	0
LYS4	1162.82	1545.55	1546.27	1244.5	910.151	1297.88	1369.66	1482.74	1141.14	1290.95	1283.63	1641.4	0
LYS5	1963.55	1652.8	1279.69	1127.56	1044.24	1020.62	973.235	1239.39	931.106	797.219	537.044	509.892	0
LYS7	489.951	1336.61	755.233	1064.69	982.045	764.706	880.348	1150.54	876.136	1100.29	949.605	834.829	0
LYS9	3603.97	3502.83	4464.38	3939.12	4185.9	4818.62	5652.21	5011.68	4607.16	4243.48	4417.67	3917.89	0
MAC1	213.534	229.834	237.537	235.328	240.366	245.052	248.75	244.288	205.594	258.163	238.435	175.253	0
MAD1	377.99	302.359	356.89	277.637	227.764	208.262	246.553	204.354	241.614	181.89	233.222	227.058	0
MAD2	239.573	347.576	835.601	549.441	416.824	446.561	468.527	613.339	649.485	452.383	445.551	523.21	0
MAD3	110.522	123.283	152.027	134.893	178.287	131.04	155.093	151.905	131.45	115.297	132.643	99.1987	0
MAE1	837.427	450.473	873.762	1197.24	842.467	1205.99	1569.78	1615.27	1838.68	998.698	1414.53	3479.77	0
MAF1	534.118	491.103	396.655	424.069	443.119	317.957	359.635	307.937	320.215	438.284	314.827	248.015	0
MAG1	269.476	247.172	361.812	303.208	223.474	138.331	167.789	110.004	194.634	188.98	127.165	132.816	0
MAG2	1091.18	1112.3	721.609	688.046	704.562	625.15	766.911	980.146	671.131	754.964	770.493	668.489	0
MAK10	41.5338	49.7909	51.5789	45.9608	40.6092	46.7812	51.7306	42.4212	47.3042	47.5415	53.2054	61.8684	0
MAK11	504.635	524.378	304.038	329.525	337.212	453.887	572.583	683.014	503.845	382.888	473.319	281.089	0
MAK16	157.754	62.2865	145.587	168.472	188.983	229.62	221.394	256.392	285.289	145.169	275.948	214.544	0
MAK21	90.1089	82.2437	100.492	67.1716	78.5486	82.5566	91.4623	81.3765	114.136	81.588	102.592	122.433	0
MAK3	686.763	1036.03	837.425	905.523	776.456	943.342	969.979	1093.82	1058.07	971.467	1169.34	1145.66	0
MAK31	1795.14	2441.28	1656.46	1716.56	1428.8	1951.72	1970.33	1966.59	2482.05	2293.14	2098.6	1659.74	0
MAK32	283.48	297.915	233.578	312.217	265.37	261.578	325.711	325.186	295.214	238.203	282.286	159.626	0
MAK5	169.292	133.909	312.119	225.076	201.004	298.924	279.564	248.966	327.124	238.994	304.941	394.742	0
MAL11	4889.36	3211.83	1932.91	2839.28	2614.9	826.754	839.761	449.458	658.861	1440.81	767.526	595.347	0
MAL13	303.378	217.086	130.408	190.265	223.829	196.709	194.249	153.599	175.008	205.5	191.653	121.329	0
MAL23	19.682	21.1505	21.1393	13.3193	15.7933	14.0246	19.6691	12.1543	14.1407	13.4555	11.828	14.3394	11
MAL31	2189.09	1978.29	820.048	1039.35	1074.47	747.713	784.642	672.573	678.62	1477.78	595.4	514.337	0
MAL32	2945.04	2460.86	1889.87	1885.66	1776.13	884.097	925.305	791.804	861.696	1608.09	1155.94	1339.71	0
MAL33	640.236	536.77	268.908	313.242	470.435	655.244	678.012	586.701	672.064	567.051	573.635	254.107	0
MAM1	103.57	35.5025	39.0528	34.9499	29.9567	24.9835	26.4977	36.878	26.4338	16.0603	15.7426	24.1112	0
MAM3	1101.46	1573.71	549.865	882.442	884.899	600.575	736.307	942.264	491.21	573.556	559.657	595.674	0
MAM33	2052.69	941.709	1756.57	1360.34	1736.91	2122.7	1774.96	1519.84	2600.93	2267.59	2479.03	1938.44	0
MAP1	280.855	256.315	387.196	320.911	228.701	219.844	263.081	277.025	257.138	289.541	357.657	526.217	0
MAP2	1046.96	1136.77	810.636	1132.6	1089.87	1064.26	1090.1	1606.48	1322.59	1648	1821.76	1698.6	0
MAS1	522.043	589.554	1029.47	869.666	1016.24	1150.46	1240.68	1312.21	986.928	832.581	895.479	762.686	0
MAS2	59.7737	54.2928	57.4114	65.1058	114.809	174.836	133.284	77.5494	134.155	153.039	219.966	143.633	0
MAS6	2224.52	2151.23	1793.84	2575.29	2087.84	2308.61	2654	3128.18	2892.58	3014.84	3436.18	3627.56	0
MBA1	402.446	336.724	572.97	685.437	722.947	727.698	944.113	408.857	1096.28	774.829	755.055	495.199	0
MBB1	987.658	1267.11	754.968	856.129	731.936	790.958	806.403	1178.82	663.914	830.038	511.799	417.989	0
MBF1	6018.77	4985.46	3188.27	5040.48	3966.09	4079.86	4723.7	4389.39	3691.68	3216.89	3089.09	1872.05	0
MBP1	131.497	148.843	248.791	167.895	139.224	179.294	167.472	119.654	207.169	221.319	189.172	368.63	0
MBR1	1092.38	1032.33	723.145	777.025	840.81	575.958	656.064	892.795	473.634	336.547	283.86	256.012	0
MCA1	859.964	972.28	807.585	697.017	685.2	750.253	797.002	1130.02	692.268	996.309	767.158	1046.78	0
MCD1	73.7716	110.711	161.96	137.148	153.515	190.758	241.633	202.721	233.069	148.047	282.241	249.12	0
MCD4	639.927	518.124	1159.75	967.182	1030.9	1136.94	1414.88	1295.99	1137.11	1576.26	1439.02	970.697	0
MCH1	514.149	978.763	1047.68	1009.35	966.721	744.209	837.358	784.445	654.156	488.885	415.779	488.018	0
MCH2	92.2515	87.4156	58.5015	75.2801	71.7997	40.2015	45.4182	61.2361	23.3074	25.6816	22.2831	19.0586	6
MCH4	189.808	355.143	255.894	223.267	226.888	150.613	295.24	396.393	208.527	138.676	148.182	77.3067	0
MCH5	375.189	190.016	244.118	299.762	238.467	214.344	245.092	269.549	183.111	106.073	119.192	141.106	0
MCK1	662.263	1509.76	1227.88	1289.96	1658.51	1549.49	1585	1678.26	1346.84	1184.41	1170.41	978.539	0
MCM1	935.876	734.962	718.358	967.704	849.976	599.666	759.639	719.334	803.459	917.905	1070.87	1094.74	0
MCM10	155.828	95.7166	62.1553	49.6052	42.9128	52.8685	55.5791	96.3184	81.1942	56.3155	63.2834	58.3583	3
MCM16	299.402	341.163	386.605	343.889	259.634	398.086	400.302	404.773	509.73	270.795	298.749	274.43	0
MCM2	1502.81	1154.04	978.636	687.06	566.4	733.577	829.576	1022.65	888.944	650.701	723.763	900.549	0
MCM21	651.955	556.412	580.54	535.147	376.16	507.721	467.276	446.717	668.515	526.664	379.857	340.542	0
MCM22	38.6258	29.0978	50.0895	35.09	46.6298	50.3714	47.6622	39.3852	35.6857	24.4066	26.6086	34.1169	0
MCM3	597.298	579.648	441.627	490.629	488.184	414.184	452.528	354.423	424.275	443.564	425.719	624.814	0
MCM6	39.1597	34.7365	40.3062	33.6879	44.64	39.3277	37.1779	24.6277	37.1043	54.141	45.9909	52.9605	0
MCR1	2775.45	2003.72	2802.03	2679	2858.43	2889.6	3091.89	2900.11	2682.5	2170.36	2016.83	1718.36	0
MCT1	185.917	213.933	210.672	298.983	259.211	398.132	448.352	419.568	409.199	256.251	335.468	283.519	10
MCX1	98.0444	74.0402	66.9174	75.1149	63.1981	73.6473	85.7457	94.4037	85.7944	57.9902	73.0839	66.8999	0
MDG1	332.63	612.77	848.087	538.121	882.865	533.101	462.697	512.255	594.665	554.63	420.48	243.498	0
MDH1	5080.63	3149.88	5312.76	6861.66	5783.75	5336.56	6107.58	5287.34	6243.01	7014.18	6258.72	6028.38	0
MDH2	3231.63	3646.31	2920.58	3819.88	3744.41	1878.4	2232.66	2461.4	1273.47	820.077	243.576	221.88	0
MDH3	3958.65	4993.37	2858.66	3057.64	3112.47	2740.32	2735.05	2678.84	2503.07	1873.89	1507.35	1120.04	0
MDJ1	2206.91	2077.6	872.348	1632.35	1412.95	1180.88	1264.28	876.273	1860.49	1418.02	1380.33	1319.37	0
MDJ2	91.1084	109.741	50.5848	60.5531	50.2818	56.6022	56.4091	84.3557	58.233	59.1062	60.1761	53.4475	4
MDL1	463.224	569.26	436.061	564.948	609.385	648.799	693.993	790.627	431.516	502.281	661.064	517.153	0
MDL2	189.151	339.353	269.199	216.723	229.249	226.206	237.919	275.516	211.042	261.946	268.814	319.488	0
MDM1	454.45	445.146	530.821	533.439	402.301	383.624	463.119	499.615	437.271	428.539	388.571	399.809	0
MDM10	95.9	79.0608	97.847	81.9177	105.058	96.0025	84.8632	122.644	68.613	74.0468	83.7311	61.7753	0
MDM12	236.123	352.449	429.948	556.656	410.397	394.173	418.449	395.855	459.52	394.871	328.276	241.784	0
MDM20	58.5419	49.634	101.715	64.23	77.7839	87.8694	94.1698	80.9787	104.319	21.2998	69.8208	82.419	0
MDM30	182.334	148.891	184.406	188.007	175.04	173.228	200.896	195.853	152.26	182.169	187.203	159.888	0
MDM31	659.531	787.097	534.093	655.179	568.251	505.065	490.967	381.519	546.344	760.812	602.081	712.767	0
MDM32	24.5033	28.2121	39.3126	23.4184	39.7649	40.8918	42.6645	30.3863	29.4315	35.8491	23.0222	32.1907	1
MDM34	1221.52	869.484	405.07	540.759	657.229	687.935	815.068	1007.53	758.291	766.57	950.573	909.304	0
MDM35	3190.34	1732.05	3563.91	2537.64	2323.99	3066.62	3520.15	3468.24	4784.83	4781.5	4718.07	4572.3	0
MDM36	339.373	266.813	213.193	244.989	207.18	261.26	287.601	319.868	290.733	206.85	316.426	276.196	0
MDM38	1197.53	1862.8	2033.69	1389.25	1478.12	1427.09	1676.07	1918.31	1924.03	1163.58	1401.44	2331.89	0
MDM39	2179.81	1783.22	2000.69	1998.09	1273.76	1404.9	1397.39	1735.53	1826	1962.9	1591.84	1723.22	0
MDN1	292.91	188.793	516.901	273.569	347.448	264.653	354.115	378.126	306.718	469.236	522.226	706.54	0
MDR1	203.833	226.766	198.616	252.193	277.409	215.758	195.96	179.955	166.586	207.441	200.955	174.454	0
MDS3	147.641	175.954	69.057	103.805	113.514	95.6809	121.543	118.124	78.3046	110.392	113.181	127.565	0
MDV1	206.49	215.67	463.793	478.348	455.902	467.164	480.12	606.063	433.183	578.361	549.023	458.559	0
MEC1	93.5532	112.934	145.695	170.142	149.293	101.135	120.92	103.277	83.14	95.7602	88.0278	89.2212	0
MEC3	284.001	378.779	339.002	350.425	350.774	351.697	384.987	326.783	333.61	331.432	329.353	317.309	0
MED1	350.48	237.904	177.394	247.282	206.532	222.121	261.151	296.953	350.272	237.886	307.77	170.722	1
MED11	844.219	1177.41	1078.22	861.46	752.159	874.209	857.918	1097.14	986.18	818.408	789.192	884.901	0
MED2	195.518	193.328	171.004	158.432	198.857	109.424	148.481	106.888	147.616	136.175	143.051	144.79	0
MED4	1067.38	697.425	841.665	792.846	514.23	615.635	715.004	762.897	906.732	714.407	614.863	568.124	0
MED6	666.022	695.825	186.719	317.356	318.422	316.473	318.99	428.181	302.785	298.311	347.463	253.759	0
MED7	604.368	654.204	344.063	431.644	331.693	416.298	472.943	676.022	443.52	439.544	551.126	727.267	0
MED8	391.293	580.508	196.717	227.019	291.958	254.56	245.592	339.364	223.303	263.256	242.21	162.231	0
MEF1	793.657	590.728	1119.61	1084.53	1218.96	1225.36	1416.08	1342.87	1995.55	1728.82	1827.12	1886.06	0
MEF2	319.054	330.266	450.36	416.242	448.257	479.344	520.938	714.291	424.353	606.907	651.802	818.92	0
MEI4	18.0923	22.1625	13.3578	21.8029	18.2435	18.1514	18.4801	16.8429	24.5347	15.2378	18.7752	16.8715	10
MEI5	15.1792	7.2123	5.7983	7.0946	6.4572	7.9679	8.6718	8.8194	8.6766	8.1373	6.5811	7.5616	12
MEK1	41.5624	33.7813	36.4415	35.1215	30.9542	27.8955	24.6246	28.7818	32.4355	28.0376	32.1801	23.2287	11
MEL1	18.9974	32.0023	30.3577	34.6557	20.202	29.821	27.2036	22.9064	32.4099	46.924	38.5941	37.9199	12
MEP1	1233.74	1296.63	870.261	1645.84	1928.92	1759.16	1703.68	1863.06	1022.75	926.918	1000.44	868.294	0
MEP2	466.673	510.534	1623.52	1615.3	1788.25	1907.49	2064.35	1830.68	459.995	604.584	778.502	792.948	0
MEP3	138.702	170.427	176.082	239.512	192.342	285.494	322.737	326.632	200.993	317.87	423.615	568.054	0
MER1	28.476	42.4164	29.3621	33.775	19.3383	27.2944	26.9242	52.6165	36.1054	46.917	33.5827	55.3338	10
MES1	1528.21	1225.78	1589.12	1652.54	1706.61	1931.42	1781.05	1541.63	1990.17	2701.22	2642.83	2505.96	0
MET1	1793.55	1001.18	1907.18	2312.14	1873.42	2005.1	2334.74	1554.66	3623.4	2407.55	3059.18	2754.65	0
MET10	1784.49	1740.93	1934.92	1627.72	451.241	1548.15	1651.75	1547.74	2151.46	1955.69	2117	2538.6	0
MET12	741.308	840.106	485.976	630.832	601.941	783.156	832.573	978.921	690.428	902.322	838.408	730.425	0
MET13	1317.3	1465.32	923.5	1417.1	1487.42	1503.34	1469.02	1822.32	1637.12	1498.99	1897.71	1903.74	0
MET14	1687.93	1649.55	3405.54	3720.21	4333.29	4182.22	3358.61	2665.79	4789.13	5126.16	5542.45	4746.55	0
MET16	2298.23	2327.2	2681.19	3096.46	2383.54	2376.86	2758.96	2585.49	3257.06	2826.24	2920.02	3084.35	0
MET17	9511.16	8044.48	9242.16	8096.88	8989.99	9064.92	9209.82	9388.65	8552.68	8595.69	8731.05	7554.97	0
MET18	66.1563	50.3303	118.448	89.33	75.4569	83.6833	66.5405	61.1584	86.6421	93.2267	87.8608	125.652	0
MET2	1536.11	1912.15	1326.16	1709	1765.45	1370.22	1670.67	1700.49	895.545	1310.91	2163.9	1783.94	0
MET22	1960.21	1892.61	2089.27	2371.14	1975.11	2398.34	2457.91	2561.38	2621.27	2540.18	2978.9	3134.13	0
MET28	2423.69	2067.1	1253.88	1812.04	1530.23	1478.41	1717	1414.46	1594.83	1009	1437.02	1028.9	0
MET3	2184.05	1188.58	3857.99	3293.43	3118.33	2718.8	3303.36	3358.29	4076.45	3722.36	4191.66	3484.93	0
MET30	444.525	496.034	285.998	366.061	348.127	351.409	298.322	266.662	223.325	286.131	265.631	235.411	0
MET31	213.065	229.154	225.526	183.725	174.257	286.782	230.404	379.919	281.656	174.638	251.148	202.959	0
MET32	533.968	412.607	332.092	193.287	176.34	197.733	247.604	174.109	328.859	173.593	195.946	199.499	0
MET4	153.688	247.96	355.143	332.295	313.758	227.223	252.754	155.408	209.112	210.078	203.212	271.99	0
MET6	2907.8	2217.12	3695.02	4632.11	5493.79	4925.8	5199.36	3784.84	5303.41	5331.72	5475.4	5623.21	0
MET7	557.086	673.566	521.543	536.68	613.908	809.1	768.547	909.567	760.323	792.394	768.386	601.277	0
MET8	443.959	525.727	185.22	226.541	152.052	779.261	740.272	890.475	1197.8	642.221	986.691	1210.45	0
MEU1	154.308	138.868	236.525	229.416	195.092	278.704	287.101	287.728	264.162	263.768	326.463	183.469	0
MEX67	739.951	816.676	447.016	607.457	620.478	628.231	736.203	988.433	837.775	683.693	997.267	680.15	0
MF(ALPHA)1	911.153	191.726	112.646	122.414	86.7801	103.304	121.363	141.621	112.961	117.737	122.782	124.124	5
MF(ALPHA)2	67.9569	74.1673	57.9745	88.4766	58.8523	48.2063	55.1231	61.187	33.7191	32.8797	33.6987	34.2348	4
MFA1	11012.4	11078.2	5419.41	7237.22	5620.59	4706.35	5196.17	6616.35	7704.21	6060.5	5771.23	6944.48	0
MFA2	7482.86	5898.96	5507.87	5223.08	3708.37	4299.61	4622.75	5840.82	5253.72	6134.17	8134.07	9376.63	0
MFT1	316.159	520.016	489.452	417.89	305.023	286.628	281.648	434.365	306.9	302.066	325.155	384.104	0
MGA1	61.3241	43.3559	48.3067	49.0381	46.398	32.7239	34.6701	38.6504	25.7809	244.255	48.8879	49.2245	4
MGA2	145.049	159.573	152.049	129.732	167.002	104.55	92.9602	27.8903	70.9925	66.8392	51.3253	53.2351	0
MGE1	432.871	580.144	679.905	731.408	635.228	1010.64	1046.24	835.754	1133.92	1234.07	1267.05	1185.65	0
MGM1	359.412	296.667	248.661	282.655	246.113	265.017	289.558	269.971	286.203	335.198	268.833	215.692	0
MGM101	1184.45	684.354	1510.8	1560.62	1600.95	1174.4	1286.38	1271.6	1452.5	1178.57	1360.81	1057.08	0
MGS1	60.0078	79.3192	50.076	84.6941	78.7579	73.8993	84.0932	89.5474	41.9612	58.682	76.9411	46.8483	0
MGT1	3377.31	2577.08	1462.22	1407.08	1060.92	1024.94	1158.75	1141.5	1187.54	531.114	608.238	484.53	0
MHP1	1431.3	1306.86	1203.16	1521.5	1500.82	990.329	1125.45	1480.71	720.612	1382.39	1008.34	1264.03	0
MHR1	482.093	462.106	336.292	540.852	571.292	682.997	706.051	790.654	904.673	829.08	952.396	908.301	0
MHT1	431.713	293.165	467.673	497.725	497.25	739.692	813.743	673.438	995.644	1060.17	1090.39	1121.03	0
MID1	191.534	323.461	296.861	391.859	392.835	359.317	387.908	359.208	356.374	354.85	406.88	348.314	0
MID2	483.925	400.478	687.459	746.788	471.896	598.32	669.851	667.5	867.982	965.53	778.844	956.499	0
MIF2	62.0272	94.4307	204.405	197.915	172.943	170.743	190.609	175.177	171.275	157.973	183.888	184.201	0
MIG1	606.508	504.675	299.91	421.254	378.917	268.804	259.462	380.313	346.283	491.22	492.063	468.983	0
MIG2	103.6	94.1605	69.3403	77.9951	47.727	54.4083	57.5807	54.2682	69.5484	59.724	67.174	74.3745	2
MIG3	162.604	110.216	78.2947	88.5653	67.034	77.4994	77.62	88.691	112.378	79.2243	88.8149	102.166	8
MIH1	113.035	240.717	159.046	248.382	206.286	165.662	195.265	186.69	132.644	138.043	141.022	152.269	0
MIP1	133.033	133.552	198.873	127.312	105.247	132.957	149.683	180.773	171.26	186.471	172.236	305.784	0
MIP6	169.194	122.539	120.064	121.401	88.144	184.734	172.474	154.965	235.401	101.419	104.566	110.804	0
MIR1	6275.55	4513.79	7442.5	9228.28	11524.1	8525.41	9244.4	9186.6	9053.01	7969.21	9912.19	8640.81	0
MIS1	131.923	165.321	397.565	347.113	484.681	534.325	375.647	401.219	601.321	701.09	948.938	711.445	0
MKC7	69.3404	108.86	150.338	146.758	135.266	192.992	216.408	170.946	233.032	213.394	288.643	314.26	0
MKK1	290.5	358.641	195.986	206.738	194.212	275.725	300.471	315.69	245.692	242.953	239.679	224.326	0
MKK2	340.753	272.191	177.889	241.799	227.499	220.477	214.693	257.105	237.53	224.239	232.233	142.515	0
MKS1	79.4492	143.443	167.216	193.24	185.055	157.234	168.781	182.433	160.978	151.168	185.01	215.043	0
MKT1	271.199	316.088	396.338	376.192	547.507	445.875	539.003	446.005	323.418	516.13	524.687	337.272	0
MLC1	1501.38	2222.93	1807.17	2173.77	1752.5	1994.9	1954.01	1488.19	2049.9	2075.98	1830.45	1523.32	0
MLF3	64.2323	139.396	158.734	125.885	138.144	109.19	111.598	136.19	107.952	88.0107	79.0286	151.441	0
MLH1	154.294	147.468	122.31	118.104	104.861	114.258	138.052	145.338	119.167	123.223	128.458	100.987	7
MLH2	59.876	42.4271	41.1066	69.1652	69.1257	48.3403	66.5806	56.0922	53.7971	34.991	48.8788	72.8294	0
MLH3	418.64	410.405	367.342	291.19	437.651	260.66	293.473	212.051	305.743	377.775	294.737	316.729	0
MLP1	209.837	185.572	282.051	238.947	239.171	201.525	252.685	283.569	212.259	261.14	336.447	349.192	0
MLP2	257.21	204.818	251.116	198.585	181.534	214.747	205.787	200.017	227.799	284.375	386.255	486.831	0
MLS1	558.839	626.999	1454.18	1591.83	2090.2	1630.75	2145.81	2144.74	1773.02	657.038	314.875	245.997	0
MMF1	3130.8	2401.77	2792.39	3420.8	2212.68	2584.88	2801.64	2343.36	2752.96	3797.65	3852.95	4192.57	0
MMM1	91.657	96.3982	110.65	134.892	121.871	128.488	153.578	158.557	125.147	162.639	137.609	107.894	1
MMP1	1572.88	996.206	849.364	1137.37	1288.39	1308.35	1626.32	1299.15	1568.3	751.132	1050.75	709.501	0
MMR1	213.463	284.19	382.638	557.269	603.815	415.375	422.748	470.188	302.403	472.076	594.683	504.545	0
MMS1	112.585	107.753	112.505	81.1619	85.6489	66.6094	66.5334	62.3655	60.7132	67.7665	65.7704	58.8229	0
MMS2	2153.32	1908.03	1148.51	1074.76	953.143	1147.25	1168.04	1143.23	1142.27	1194.02	914.181	792.745	0
MMS21	46.3039	54.7918	33.709	26.0196	30.4432	40.5616	34.4289	49.66	36.1615	24.5879	28.2048	22.0991	10
MMS22	112.041	107.567	167.259	153.725	142.383	160.701	145.293	152.442	144.432	90.2993	120.95	140.275	0
MMS4	24.7364	36.9446	25.4404	28.161	31.0789	32.2086	32.9489	31.7274	25.6425	31.3914	37.8169	24.1827	3
MMT1	48.0235	71.2311	86.7373	65.1964	70.6672	64.6069	78.484	87.3643	69.2771	55.1375	67.3788	52.9907	0
MMT2	346.691	478.146	265.388	274.914	310.169	276.563	303.998	351.09	280.203	400.708	290.598	211.838	0
MND1	10.5387	10.6537	13.8065	11.1824	9.2986	13.7089	10.193	12.7706	11.9621	13.3248	11.7492	12.2741	12
MND2	246.026	159.653	113.084	131.572	123.75	105.335	121.682	93.0782	99.8511	66.4194	75.399	76.9012	0
MNE1	92.5261	141.072	112.301	135.034	111.22	84.9799	96.1091	60.2022	78.5591	71.6432	65.7541	64.7342	2
MNL1	1000.79	773.636	513.704	654.588	416.044	518.875	494.941	638.877	748.665	607.581	774.349	894.649	0
MNN1	287.355	213.521	386.711	467.414	404.891	475.63	525.292	312.294	434.215	1205.6	1214.41	1286.83	0
MNN10	810.776	651.343	658.206	732.56	752.207	772.547	949.927	608.483	929.986	738.3	789.737	521.345	0
MNN11	1154.24	681.214	1176.36	1434.71	1599.78	1374.04	1683.23	2000.82	1882.04	1892.65	2249.81	1815.63	0
MNN2	121.83	253.565	229.733	197.316	242.456	222.984	205.607	231.823	207.125	287.145	321.049	371.858	0
MNN4	504.113	411.257	801.291	632.625	623.526	345.283	450.155	422.227	374.962	427.576	304.795	659.369	0
MNN5	54.9745	21.0517	104.446	116.808	116.889	105.914	88.8435	82.473	92.0236	75.4744	85.2136	66.1334	0
MNN9	2082.69	1869.06	1380.53	1420.14	1172.92	1612.24	1747.2	1796.49	2092.06	1374.85	1493.38	1289.2	0
MNR2	565.326	476.279	506.576	544.606	673.074	599.457	667.982	743.422	381.856	435.702	432.9	453.041	0
MNS1	208.518	158.827	122.013	143.725	103.843	137.237	106.082	198.176	122.003	145.392	113.954	79.8633	0
MNT2	54.7675	77.9948	33.8809	42.8629	43.0818	33.4615	39.1002	32.9049	45.1983	36.5419	28.299	20.2701	1
MNT3	505.104	597.811	397.044	415.596	334.13	373.504	337.279	293.854	332.014	337.727	278.635	273.948	0
MNT4	135.467	123.244	113.892	113.716	113.306	137.309	135.351	177.457	117.081	100.757	108.397	109.557	0
MOB1	246.884	190.026	128.363	219.88	221.542	275.641	310.767	207.768	222.865	173.712	254.828	224.947	0
MOD5	438.746	359.377	189.665	196.066	218.998	271.529	293.485	340.34	271.747	185.529	242.162	89.4424	0
MOG1	1615.64	1027.56	2515.53	3055.41	2704.49	1737.09	1529.16	1633.28	2012.05	2236.79	1658.28	1514.6	0
MOH1	497.737	1031.72	1180.59	678.061	880.902	193.864	174.373	210.977	125.586	73.426	55.9735	52.0653	1
MON1	358.225	343.007	199.437	219.056	221.039	245.524	252.496	229.848	214.591	198.344	145.798	112.66	0
MON2	250.423	412.089	278.278	202.23	284.502	225.987	269.312	265.048	171.203	304.067	302.528	258.458	0
MOT1	238.453	240.519	302.362	326.254	242.963	214.697	262.877	346.692	208.839	263.721	310.962	420.953	0
MOT2	70.9727	90.165	95.6146	80.7484	91.6699	80.1032	60.0021	68.1509	67.8811	101.59	101.554	132.688	0
MOT3	22.2276	36.6762	46.7231	37.5756	46.1546	49.0386	42.3244	41.7686	45.9246	46.9927	53.005	98.2571	0
MPA43	146.102	162.747	105.777	142.512	114.227	101.442	119.131	132.832	93.5732	108.435	117.782	76.4792	0
MPC54	53.776	104.801	94.6635	128.781	113.252	81.0874	88.9882	96.5178	61.4978	27.0054	29.6872	39.3716	1
MPD1	107.878	215.149	222.103	256.658	228.46	198.682	253.442	116.752	215.937	318.123	287.371	287.066	0
MPD2	462.388	1428.76	688.148	824.563	1094.3	791.494	792.174	832.931	569.247	518.438	367.922	284.557	0
MPE1	570.809	497.716	489.448	671.896	579.469	444.516	418.518	440.978	542.809	683.63	624.312	707.496	0
MPH1	496.86	557.732	584.709	640.178	542.149	400.929	405.487	269.485	413.086	432.174	353.692	422.882	0
MPH2	97.9281	135.143	112.432	101.593	90.1118	147.725	173.957	188.357	249.238	95.6446	105.393	86.2303	0
MPH3	71.0589	91.9435	100.643	129.093	102.087	141.127	186.695	186.967	144.865	90.1743	108.628	71.3465	0
MPM1	1171.09	1611	866.214	1138.93	1598.91	997.047	943.221	1207.23	766.813	807.708	761.961	727.877	0
MPP10	252.19	258.859	521.475	450.639	387.398	535.264	557.266	643.848	586.616	412.605	517.215	492.707	0
MPS1	157.216	193.925	223.885	193.385	218.559	241.076	198.062	185.297	169.187	286.245	278.955	249.693	0
MPS2	68.8412	70.3241	50.3427	90.7677	68.4933	75.1375	84.1537	50.5452	63.3769	64.5312	74.6026	51.5172	3
MPS3	28.1069	29.6344	32.3163	26.4436	48.8882	31.1622	39.9791	43.3158	29.1677	29.9207	48.2453	29.5715	0
MPT5	632.135	552.597	684.322	547.331	460.939	469.159	412.379	398.441	522.601	617.685	676.177	900.582	0
MRC1	131.347	95.0185	80.7849	84.4103	84.7766	94.797	121.116	124.404	138.138	131.081	130.372	157.32	0
MRD1	98.9457	107.394	114.008	112.941	99.8754	136.525	149.059	119.825	171.109	106.969	145.537	139.802	0
MRE11	120.754	126.058	120.314	206.686	145.383	118.217	143.619	111.422	138.906	123.024	139.514	149.633	0
MRF1	200.021	250.967	390.157	568.026	463.902	292.895	370.101	114	506.383	633.373	683.948	614.699	0
MRH1	2314.76	2444.31	2831.62	3264.19	3097.33	2321.02	2674.7	2165.07	1495.95	2553.64	2514.42	1837.65	0
MRH4	176.81	175.371	159.437	173.788	135.724	182.78	182.033	188.232	266.041	200.892	271.26	324.881	0
MRK1	707.274	860.354	307.61	507.926	550.905	630.591	721.669	598.867	620.442	2617.12	767.055	550.308	0
MRL1	271.812	190.97	123.981	135.812	139.368	146.312	164.204	169.692	185.085	194.088	173.114	152.878	0
MRM2	275.138	143.854	168.665	190.863	194.807	160.894	173.924	157.105	168.43	153.141	132.254	114.912	0
MRP1	700.493	778.906	643.493	846.749	841.777	1303.55	1254.45	1479.06	1779.02	2029.09	1812.76	2091.25	0
MRP10	889.602	800.988	992.858	957.379	804.495	1211.94	1091.43	1340.04	1741.57	1528.52	1509.59	1803.66	0
MRP13	120.817	76.4888	101.846	77.461	82.2606	103.231	93.6469	83.1499	139.446	115.554	141.041	174.341	0
MRP17	1395.38	1608.25	1895.29	1772.14	1652.69	2267.32	2331.26	2841.82	2999.33	2894.52	3000.23	3435.69	0
MRP2	1758.12	1156.49	2414.73	2448.96	1449.32	3016.61	3081.31	2801.2	3819.92	4214.26	2761.4	3601.37	0
MRP20	703.209	607.472	342.16	570.964	489.804	591.188	781.168	923.225	832.955	742.432	882.681	1723.73	0
MRP21	255.583	343.477	401.013	392.316	336.871	418.464	290.34	407.953	659.005	767.446	505.881	513.186	0
MRP4	299.924	260.729	247.576	477.731	497.936	578.728	622.893	520.22	629.558	586.568	1000.51	1136.67	0
MRP49	1509.94	705.166	1428.95	1648.2	1467.24	1401.47	1379.69	1589.85	1978.91	2081.69	1914.45	2153.41	0
MRP51	139.622	146.239	213.943	163.52	171.675	240.311	219.994	226.626	289.858	244.403	209.955	215.425	0
MRP7	198.562	219.892	505.742	386.044	441.915	616.622	661.618	465.533	785.073	554.352	617.898	612.231	0
MRP8	2286.56	1495.57	2295.2	3517.47	3249.42	2066.71	2576.61	1705.94	2106.96	2674.03	1613.13	1567.91	0
MRPL1	617.964	754.827	590.404	717.412	929.933	1028.43	868.175	951.162	1232.69	1317.48	1093.4	1140.88	0
MRPL10	1738.46	1600.28	1531.81	1673.8	1823.13	2230.32	2398.03	2661.3	2863.22	2095.78	2366.44	2696.64	0
MRPL11	381.818	579.546	631.775	569.24	595.313	867.406	800.338	838.403	1260.41	1287.77	1177.03	1121.3	0
MRPL13	1055.94	604.941	571.82	662.181	877.982	1078.56	1052.66	1317.12	1597.83	1575.14	1564.41	1305.11	0
MRPL15	1031.91	1354.91	1640.04	1282.04	1909.62	1868.76	1999.51	1946.56	1949.94	1906.65	1797.41	1226.3	0
MRPL16	986.678	734.218	567.656	628.404	808.168	1026.17	1047.49	854.445	1104.98	962.116	942.665	873.898	0
MRPL17	139.727	318.692	445.763	410.784	349.119	411.691	437.907	452.161	537.765	653.986	471.078	535.799	0
MRPL19	368.247	419.27	400.398	557.554	556.398	889.045	1005.2	1117.32	965.826	1170.15	1574.96	1480.39	0
MRPL20	1112.52	1318.37	934.723	1207.05	1333.7	1775.62	1707.12	1980.87	2367.62	2281.7	2671.46	1372.51	0
MRPL22	156.72	166.11	181.451	179.699	241.992	284.684	244.042	238.883	318.226	269.121	277.096	255.231	0
MRPL23	548.552	1139.3	724.885	1143.52	1177.42	1021.6	1076.2	1350.48	1449.34	1630.94	1550.22	1468.13	0
MRPL24	308.593	217.946	508.999	423.198	412.182	430.448	430.681	346.602	793.068	837.443	817.721	850.924	0
MRPL25	577.483	349.522	659.769	430.986	327.892	574.629	610.028	421.343	937.044	649.324	771.346	897.154	0
MRPL27	520.813	532.046	1304.31	1156.44	959.174	1716.55	1407.1	1551.51	2493.54	1967.88	2108.94	2109.05	0
MRPL28	1552.9	2422.01	1431.27	2142.05	1999.43	1672.57	1629.53	1760.25	1763.24	1572.39	1731.85	1802.52	0
MRPL3	488.347	865.732	739.576	1119.06	991.181	1286.16	1393.33	1539.72	1664.55	1809.49	1683.22	1642.36	0
MRPL31	466.994	146.234	486.289	478.427	467.68	771.653	822.936	557.158	1064.21	1054.32	1206.64	1491.77	0
MRPL32	688.157	450.926	575.799	688.18	640.475	1017.31	1038.1	962.629	1395.65	1052.39	1129.41	983.247	0
MRPL33	1192.48	2282.44	2069.6	3279.62	2564.25	3419.48	3195.38	3990.33	4522.21	4403.89	4264.79	3961.88	0
MRPL35	285.335	248.228	283.241	203.378	271.651	380.599	356.092	299.781	453.567	487.035	459.393	496.382	0
MRPL36	865.159	1381.83	1312.29	1290.47	1273.94	1534.11	1494.26	1384.81	1798.52	2083.74	1712.98	1240.58	0
MRPL37	2792.54	3127.72	2587.85	3789.05	2700.26	3456.11	3517.06	4317.67	4901.47	5381.38	4761.58	4786.58	0
MRPL38	1303.52	698.16	2067.26	2761.22	2236.36	1778.73	1622.61	1261.53	2365.44	2624.7	2461.57	2459.42	0
MRPL39	2681.81	1713.21	3094.17	2023.25	2133.94	3861.39	3913.1	3681.19	5028.93	4174.88	4515.34	4274.97	0
MRPL4	628.77	725.741	355.068	699.46	794.755	1210.05	1401.96	1659.16	1617.72	1242.57	1630.51	1599.71	0
MRPL40	398.423	423.106	373.109	468.742	558.856	961.346	859.852	1021.41	1186.22	1071.19	1246.64	1022.48	0
MRPL44	1601.34	1061.56	1751.29	1476.7	1327.34	2056.23	2197.01	1910.13	2731.93	3007.53	3982.46	4459.29	0
MRPL49	247.893	265.008	1214.31	790.368	1314.15	1692.7	1456.56	1685.67	1500.98	1300.32	1404.95	1048.42	0
MRPL50	119.44	210.516	193.114	249.714	296.641	321.171	249.543	268.101	314.285	519.232	437.124	403.402	0
MRPL51	3233.24	3083.39	3142.22	3340.59	2874.27	3121.66	2942.41	2837.61	4704.57	4437.02	4483.01	4245.42	0
MRPL6	1809.21	1413.54	932.73	1178.24	1132.55	1398.74	1330.82	1335.57	1802.31	1057.21	1656.2	1081.19	0
MRPL7	391.275	275.17	476.273	469.198	491.568	665.49	728.844	432.107	1166.33	769.138	1008.11	802.373	0
MRPL8	420.41	925.679	1402.33	1827.46	2077.02	2127.94	2116.07	2791.81	2613.07	2952.97	3209.99	3302.09	0
MRPL9	1087.69	746.597	1317.23	1260.51	1262.61	1692.84	1462.15	1276.45	1998.01	1729.24	1821.04	1779.54	0
MRPS16	4788.77	2747.45	4351.07	2846.72	2687.79	2528.53	3377.67	2694.69	4738.08	3244.37	4289.94	5061.41	0
MRPS17	442.537	431.27	928.847	696.865	706.56	939.987	924.102	821.732	1294.94	1059.08	1236.46	1512.21	0
MRPS18	399.346	741.199	878.191	979.125	1288.22	1118.2	917.769	1093.29	1143.19	1058.91	1004.94	826.779	0
MRPS28	717.878	508.136	444.555	993.482	792.28	1007.3	1269.32	624.886	1479.11	1053.27	994.771	1103.92	0
MRPS35	620.74	312.171	315.46	467.354	438.888	755.241	752.769	725.543	934.055	628.475	662.366	401.559	0
MRPS5	49.8706	39.0507	60.2995	60.1193	67.5057	69.0012	84.0222	38.2738	93.2229	117.192	92.359	82.822	0
MRPS8	463.952	540.449	549.517	620.938	740.371	739.067	630.818	857.924	823.046	1136.89	1191.07	1031.49	0
MRPS9	385.727	523.445	862.128	754.92	990.925	1150.2	1082.23	1077.92	1464.78	1253.47	1438.67	1449.86	0
MRS1	427.159	264.248	319.694	423.061	264.727	410.44	472.834	367.802	677.978	478.87	665.221	686.15	0
MRS11	3363.81	2204.86	3985.87	3329.25	2866.55	3711.35	3135.44	2803.27	4495.09	4479.23	4004.98	4158.91	0
MRS2	215.081	199.447	135.251	173.334	150.023	233.161	248.476	290.273	316.681	232.028	349.935	281.563	0
MRS3	104.786	129.611	368.999	439.155	349.684	400.476	371.3	519.885	435.335	479.184	636.06	616.528	0
MRS4	250.198	215.955	169.314	260.136	252.025	199.208	249.935	254.096	211.596	490.789	396.151	178.255	0
MRS5	385.962	385.852	450.361	503.434	327.953	710.405	694.93	714.886	937.932	963.68	920.178	934.595	0
MRS6	946.974	952.486	1024.29	991.086	869.779	748.408	761.03	926.087	737.907	723.306	753.873	739.768	0
MRT4	2102.07	1425.75	2571.97	2300.91	1536.9	2420.7	2998.85	2562.39	3172.98	1670.29	2758.07	2365.39	0
MSB1	196.737	280.366	190.939	304.669	265.098	272.454	283.309	361.482	298.635	307.36	442.077	338.414	0
MSB2	856.751	764.028	613.681	432.698	570.666	636.498	590.784	596.141	591.372	640.834	694.626	908.26	0
MSB3	146.515	175.101	119.687	142.389	168.407	130.913	138.671	126.252	82.4177	126.354	99.3767	92.8331	0
MSB4	220.553	322.364	208.094	279.508	287.091	290.421	269.61	242.334	272.328	226.4	249.562	188.196	0
MSC1	4303.31	3742.84	3359.03	3423.21	4040.88	2019.12	2093.89	2236.29	330.417	1087.97	205.715	127.728	0
MSC2	228.321	291.785	359.127	361.714	342.195	205.703	221.386	117.675	195.458	287.033	221.426	309.728	0
MSC3	607.553	751.895	533.038	826.512	753.374	407.684	458.157	510.77	262.631	407.067	354.989	392.351	0
MSC6	291.479	318.112	417.346	363.122	444.282	582.305	628.584	494.959	647.051	618.179	561.793	553.991	0
MSC7	1334.76	1175.29	1295.22	1686.08	1450.65	1461.55	1260.17	1467.46	853.053	1174.39	1033.45	981.813	0
MSD1	204.159	346.145	489.365	505.463	551.587	471.083	510.651	509.089	645.823	744.34	814.752	674.785	0
MSE1	116.407	81.5203	95.9215	116.728	98.2474	172.713	182.336	157.145	225.436	196.638	175.431	105.415	0
MSF1	123.441	122.808	121.244	151.006	153.017	200.483	214.471	180.692	255.659	241.111	231.9	156.76	0
MSG5	237.179	239.922	160.363	189.408	146.821	174.413	185.18	258.987	179.679	176.316	247.963	229.956	0
MSH1	222.904	194.241	177.847	202.874	130.808	182.78	229.449	216.701	248.216	164.588	188.262	177.722	0
MSH2	72.7845	101.616	108.083	132.851	173.925	190.449	205.956	157.538	145.02	159.234	143.93	131.339	0
MSH3	18.2144	19.331	19.9526	19.9932	25.5641	22.2973	26.1384	13.2152	13.6541	21.9629	30.0843	31.4441	0
MSH4	148.859	73.7222	48.9134	48.0975	32.1243	46.1341	43.2243	58.959	59.4369	46.3975	41.8054	48.4227	5
MSH5	96.464	88.536	79.6361	81.9078	76.9108	80.7006	66.4802	21.7199	82.2522	49.3426	34.1444	40.6955	0
MSH6	508.593	566.211	588.43	532.137	511.103	409.58	468.282	479.147	409.659	561.156	468.9	592.106	0
MSI1	443.62	562.119	456.184	731.466	531.777	468.527	518.322	577.225	493.54	356.348	542.117	546.63	1
[truncated: 4,092 more rows]
